# Supplementary material for: Estimating and interpreting FST: The impact of rare variants
Source: HighWire-hosted journal article supplement (doi:10.1101/gr.154831.113), 2013-07-16
Supplement: Supplemental_Material.docx [file Supplemental_Material.docx]

# Supplementary Material

*F*ST Definitions In the Literature 1

Use of the WC Estimator in Studies of Selection 2

Derivation of Hudson Estimator 4

Single SNP Estimators – Coalescent Simulations 6

Combining Estimates Across SNPs – Coalescent Simulations 7

Relationship to Divergence Time 8

Dependence on the Set of SNPs Analyzed – Coalescent Simulations 9

Moment-based Estimator of Weir and Hill 2002 (WH) 11

Maximum-likelihood Estimator of Weir and Hill 2002 (WH-ML) 11

Beta-Binomial Maximum-Likelihood Estimators (Balding) 12

Beta-Binomial MCMC Estimator (Holsinger) 16

Sampling Common SNPs from 1000 Genomes 17

Weir and Cockerham’s *F*ST (WC) 18

Derivation of WC Quantity Being Estimated 20

Nei’s *F*ST 21

Hudson’s *F*ST 23

Details of Coalescent Simulations 24

Simple Demographic Simulations 25

Simulations Including Migration 25

Correspondence Between Nei’s Estimator and Wright’s *F*ST 27

Table S1. All 1000 Genomes Pairs 28

Table S2. Correspondence between Definitions and Estimators 29

Table S3. Estimating *F*ST With Varying Sample Sizes 31

Table S4. Effects of *F*ST estimator in the case of very simple demography 31

Table S5. Effects of averaging and ascertainment in the case of very simple demography 32

Table S6. Effects of averaging and ascertainment 32

References 33

# *F*ST Definitions In the Literature

In reviewing previous work on *F*ST we use the term “conceptual definition” to refer to any definition that is not a mathematical function of the population allele frequencies of the two populations being compared, but relies on other quantities such as coalescent times, heterozygosities, allele frequencies in a hypothetical ancestral population, etc.

Wright, and later Cockerham, conceptually defined *F*ST as the correlation between uniting gametes within one population relative to the total (1000 Genomes Project Consortium 2010; Wright 1949; International HapMap 3 Consortium 2010; Cockerham 1969). Equivalently, this definition is a ratio of variance between populations to total variance (Wright 1949). These conceptual definitions, however, depend upon knowledge of the allele frequency in the “total” population, and Wright did not give a clear means for estimating this. When providing an estimator, Weir and Cockerham (Weir and Cockerham 1984) assumed that the total population referred to the most recent common ancestral population, that studied markers are polymorphic in this ancestral population, and that *F*ST is identical for each population studied—in effect assuming that each population is a replicate of an identical evolutionary history. If these assumptions do not hold, then the estimator of (Malécot 1948; Weir and Cockerham 1984; Wright 1949) produces estimates that vary with changes in sample size.

In addition to this conceptual definition, *F*ST has been conceptually defined in terms of coalescent times (Weir and Cockerham 1984; Slatkin 1991; Holsinger and Weir 2009), heterozygosities (International HapMap Consortium 2007; Nei 1973; Li et al. 2008; Hudson et al. 1992; International HapMap 3 Consortium 2010; 1000 Genomes Project Consortium 2010), time since population divergence (Malécot 1948; Cavalli-Sforza and Bodmer 1971; Selander and Hudson 1976; Wright 1949; Guries and Ledig 1982; Ellstrand and Elam 1993; Palumbi and Baker 1994), and migration rate (Lewontin and Krakauer 1973; Wright 1949; Nicholson et al. 2002; Beaumont and Balding 2004; Foll and Gaggiotti 2008; Akey 2009; McEvoy et al. 2009; Pickrell et al. 2009; Teo et al. 2009; Bhatia et al. 2011; Jin et al. 2012). Each of these conceptual definitions corresponds with estimates from extant populations only when a series of underlying assumptions about demographic history (i.e. no migration), systems of mating (i.e. panmixia) and sampling (i.e. equal sample sizes) hold (see Table S2). However, when these are violated, estimates from extant populations may not correspond with the conceptual definition

# Use of the WC Estimator in Studies of Selection

Estimation of *F*ST has a particularly strong impact on studies of selection using population differentiation. Here we consider studies that rank single-SNP estimates of *F*ST—typically made using the WC estimator—and report SNPs in the upper tail of the distribution as signals of selection (Nei 1973; Akey 2009; Weir and Cockerham 1984; McEvoy et al. 2009; Nei 1986; Pickrell et al. 2009; Hudson et al. 1992; Teo et al. 2009; Holsinger 1999; Jin et al. 2012; Weir and Hill 2002). The dependence of WC estimates on sample sizes is exacerbated for single SNPs. Consider a SNP that is rare in one population and has allele frequency zero in the other population:. If sample sizes are equal, the single SNP estimate of *F*ST from the WC estimator is approximately. Now, consider what happens as we increase n1, the sample size of population 1, arbitrarily. It is clear that both numerator and denominator tend toward

|  |
| --- |

(see below) and *F*ST approaches 1. Then, in a study of selection with large differences in sample sizes between populations, many of the highest single SNP *F*ST estimates may be the result of inflation due to unequal sample sizes.

To test the effects of variation in sample size on single SNP estimates of *F*ST, we simulated studies of selection between two populations with two regimes of very different sample size: regime 1 (n1=2500, n2=250) and regime2 (n1=250, n2=2500). We produced the top 0.01% of highly differentiated SNPs for the WC, Nei, and Hudson estimators for regimes 1 and 2 and compared the overlap of these lists. Overlap was computed as a percentage of the number of SNPs in the top 0.01%. While we might expect that these lists overlap perfectly, the noise due to sampling error distorts the “true” top 0.01% and makes the overlap imperfect. However, as the amount of drift—or time since the populations split—increases, the amount of noise decreases relative to the signal. That is, as the time since divergence increases, we expect overlap to increase as well. While we observe large and increasing overlap for the Nei and Hudson estimates, WC estimates show little overlap between regimes 1 and 2 (see Figure S1). Population-specific estimates of *F*ST (Weir and Hill 2002) also show consistency across regimes 1 and 2, indicating that these estimates do not depend on the ratio of sample sizes. However, if these estimates are combined in a sample size weighted average, as recommended by Weir and Hill (2002) (see p. 11 of Supplementary Material), they are no longer independent of sample size and show little overlap between regimes 1 and 2 (See Figure S1).

Figure S1. Estimating the overlap of highly differentiated signals of selection. We performed studies of population differentiation between populations that diverged a number of generations ago, and compared results when sample sizes were (n1=500, n2=5000) to results when sample sizes were (n1=5000, n2=500). When estimating single SNP allele frequency differences, there are 2 sources of variation. The first is genetic drift, quantified by *F*ST, and the second is variation due to finite sample sizes. As the number of generations since population split increases, we increase genetic drift while sampling variation remains the same. Therefore, we should expect that as genetic drift increases (along the x axis), the most highly differentiated (highest 0.01%) SNPs should increasingly be the result of genetic drift and not accidents of sampling. While we observe this phenomenon for the Hudson, Nei, and population-specific (WH1, WH2) estimators of *F*ST, we see that the WC and WH estimators do not exhibit this behavior. Moreover, use of the WC or WH estimator in settings of very different sample size results in almost no overlap between the reported signals of selection. This suggests that nearly all results are due to differences in sample size.

# Derivation of Hudson Estimator

We derive equation 9 of the main text. Hudson did not give an estimator of *F*ST in terms of sample allele frequencies. However, he did describe an estimation method (Xu et al. 2009; Hudson et al. 1992; Edelaar et al. 2012; Hangartner et al. 2012), which is the basis for what we describe here. We have previously presented some of these ideas, without validation via coalescent simulations and application to 1000G data, in Supplementary Note 10 of (Slatkin 1991; Keinan et al. 2007; Nei 1973; Hudson et al. 1992; Cavalli-Sforza and Bodmer 1971; Wright 1949; Cockerham 1969). We note that the estimator described here assumes that the populations analyzed are randomly mating and will be incorrect if there is significant inbreeding. For a modification to this estimator to account for inbreeding, we refer the reader to the Appendix of (Nei 1973; Reich et al. 2009; Hudson et al. 1992). Hudson’s quantity being estimated can be written as:

where

is the heterozygosity within populations, and

is the heterozygosity between populations. We recast as:

We do not make specific assumptions about the evolutionary process as Weir and Cockerham did. However, we view the above as a parameter definition as it is based on the population (and not sample) allele frequencies. Also, we note that under the assumptions made by Weir and Hill, our estimates will not depend on the ratio of sample sizes.

We now consider the estimation of this parameter from a set of SNPs genotyped over a finite set of individuals. Suppose we have a set of markers. For marker, we deﬁne and in the obvious way and for the marker setby

Note that is a function of the population allele frequencies and is not a statistic (function of the observations). We wish to compute an estimator of. Given the form of our estimator it is highly desirable to ﬁnd unbiased estimators of and else the bias will eventually dominate the estimate. We fix, for now, a marker. Suppose the population frequencies are for the variant allele, and we observe allele counts for the variant allele, for the reference allele. Take . is deﬁned as A naïve estimator for is

We calculate the bias of . Writing

Deﬁne ( is the heterozygosity at the marker for population 1).

Then a natural estimator for is

It is easy to check that is unbiased. Similarly, deﬁne for population 2, with a corresponding estimator. This is enough to show that:

is an unbiased estimator for. Now

is an unbiased estimator for . By the Lehmann-Scheﬀé theorem,andare uniformly minimum variance unbiased estimators (Cavalli-Sforza and Bodmer 1971; Bickel and Doksum 2006). No longer ﬁxing a marker and writing for our estimator of, and so on, we see that a natural estimator for is

The proposed estimator for *F*ST and a corresponding block-jackknife estimator for standard error of *F*ST are implemented in the EIGENSOFT software package (See Web Resources).

Figure S2. Genome-wide estimates of *F*ST depend on the estimator used as well as relative sample sizes. Assuming ascertainment in population 1, we see that the WC estimator is sensitive to the ratio of sample sizes, and produces identical results to the Hudson estimator when the sample sizes are the same. While the Nei estimator is insensitive to changes in the ratio of sample sizes, it results in consistently higher estimates of *F*ST.

# Single SNP Estimators – Coalescent Simulations

To test the properties of single SNP estimators we simulated two populations and a third out-group population that all diverged 1000 generations ago. These populations were simulated using the coalescent simulator GENOME (Jost 2008; Liang et al. 2007; Ryman and Leimar 2009) under a standard Wright-Fisher model with constant generation time and random mating. To begin, we used a constant and equal effective population size for all populations. Under these conditions, and ascertainment in the out-group population, Nei estimates of *F*ST are inflated while the WC and Hudson estimates are identical (see below).

To better understand the differences between these estimators, we altered the demographic history of the two non-outgroup populations. The first population was subject to a recent bottleneck, while the second population was subject to a recent expansion. *F*ST was estimated using SNPs ascertained in the out-group population, which did not undergo any bottleneck or expansion. This ascertainment and demography allow us to calculate an expected *F*ST of 0.190 (see below). Issues related to ascertainment are investigated in more detail below. We note that, in this simulation, a large percentage of this drift is a result of the bottleneck population. That is, the *F*ST between the bottleneck population and the ancestral population is larger than the *F*ST between the expansion population and the ancestral. In this setting, population-specific *F*ST values might be of interest .

With equal sample sizes (n1=n2=2500) from populations simulated with no migration or admixture we see that WC and Hudson estimates are equal and accurately reproduce the expected value. The Nei estimator produces an inflated value of 0.206 (s.e. 0.006) (see Table S3).

As the sample sizes vary *relative* to one another, the WC quantity being estimated changes (see Figure S2). The direction of the change depends upon whether the bottleneck or expansion population has the larger sample size. WC estimates range from 0.218 (s.e. 0.006) (n1 = 25, n2 = 2500) to 0.164 (s.e. 0.005) (n1 = 2500, n2 = 25). Nei estimates are inflated but insensitive to changes in sample size. Only Hudson estimates are consistent at approximately 0.187 (s.e. 0.005) regardless of relative sample sizes. The Hudson estimatoris used to produce *F*ST estimates reported in future sections.

We note that these simulations did not include any migration. However, our findings did not change fundamentally when migration was included (see below).

# Combining Estimates Across SNPs – Coalescent Simulations

We analyzed the data from the coalescent simulations described above. We obtained estimates of *F*ST 0.187 (s.e. 0.005) and 0.134 (s.e. 0.002) using the ratio of averages and average of ratios, respectively. We note that under the demographic history described above, an estimate of approximately 0.190 is expected. Thus, large reductions in *F*ST are observed when using an average of ratios. This is true in even the simplest simulations where there have been no bottlenecks or expansions since divergence (see Table S4). We note that in addition to the large bias in the *F*ST estimator using an average of ratios, there is a slight bias in the *F*ST estimator using a ratio of averages; we are not aware of any unbiased *F*ST estimator.

In addition to underestimating the value of *F*ST, use of an average of ratios will result in estimates that depend upon the number of rare variants studied. That is, as the sample sizes and sequencing depth increase, larger numbers of rare, population-specific variants will be included in the data. As an average of ratios is highly sensitive to the low *F*ST estimates at these variants, the genome-wide *F*ST estimate will decrease (see Figure S3). These changes will not be informative for population history.

Figure S3. We compare a ratio of averages with an average of ratios when using SNPs that are polymorphic in an out-group or in either population studied. A ratio of averages produces consistent estimates of *F*ST regardless of sample size, though the choice of ascertainment has a statistically significant impact on the *F*ST estimate. Estimates produced by an average of ratios are lower but consistent when ascertainment is done in an out-group population. However, when SNPs are ascertained as polymorphic in either population, an average of ratios will decrease dramatically with increased sample size. This will result in *F*ST estimates that are incomparable across studies and essentially unrelated with population demographic history.

# Relationship to Divergence Time

Based on the work of (Wright 1949; Cavalli-Sforza and Bodmer 1971) and the equations given in (Wright 1949; Weir and Hill 2002; Cockerham 1969), we relate *F*ST to divergence time since an ancestral population as

|  |  |
| --- | --- |

where is the effective population size of population *i* in generation *g*, and *t* is the number of generations since the ancestral population. Equation s12 depends on estimation from neutrally evolving loci that were polymorphic in the ancestral population, without migration or admixture between populations. We use this to give the expected value of *F*ST in simulations with known demography (see above). If the effective population size is constant for each population, then this becomes

|  |  |
| --- | --- |

Then, if the assumptions above are satisfied, estimates of *F*ST are related to divergence time as

|  |  |
| --- | --- |

|  |  |
| --- | --- |

|  |  |
| --- | --- |

where . While estimates are not unbiased, *F*ST estimates will tend toward the expressions given in the limit of large sample sizes and large numbers of SNPs. We note that the relationship between Hudson estimates of *F*ST and divergence time was given in (Nei 1973; Weir and Hill 2002; Weir and Cockerham 1984; Nei 1986; Hudson et al. 1992; Holsinger 1999) as related to the WC estimator. However, this is only valid for the case of equal sample sizes taken from each population. In order to produce estimates of *F*ST that relate to divergence time according to equation s16, we recommend use of Hudson’s *F*ST.

# Dependence on the Set of SNPs Analyzed – Coalescent Simulations

To explore the effects of different ascertainment schemes on estimates of *F*ST, we analyzed the data from the coalescent simulations described above, in addition to simulations without any bottleneck or expansion (see Table S5). We estimate *F*ST using SNPs that are polymorphic in the out-group population, and expect an *F*ST of 0.190 in this scenario. We note that SNPs are considered polymorphic if they have a non-zero minor allele frequency in the sample. The effects of modifying the ascertainment are statistically significant and dependent on the demographic history of the populations studied (see Table S6). SNPs polymorphic in the expansion population are likely to be recent and reduce the estimate of *F*ST. On the other hand, SNPs polymorphic in the bottleneck population are more likely to be ancient and polymorphic in the ancestral population. By imposing a restriction that SNPs be polymorphic in both populations, we exclude highly differentiated SNPs that have fixed in one population or the other, and lower our estimate of *F*ST.

Additionally, we observe that *F*ST estimates showed dependence on minor allele frequency (see Figure S4) when using either of the single-population ascertainment schemes. This is expected according to population genetic theory. For example, following an expansion, rare variants in one population will tend to be recent and not polymorphic in the second population. These variants will, on average, have a lower estimate of *F*ST. In the case of a bottleneck, however, rare variants in one population are likely to be highly differentiated ancestral variants and, therefore, have a higher *F*ST. All together, our results demonstrate that the estimate of *F*ST depends intrinsically on the set of SNPs used to estimate it.

We caution that the ascertainment scheme and the method of combining across SNPs can interact to affect *F*ST estimates. For example, using an average of ratios on all variants polymorphic in sequence data lowers the estimate of *F*ST to 0.020 (see Table S6). This dramatic reduction can be explained by the sensitivity of an average of ratios to variants with low *F*ST, and the tendency of a permissive ascertainment scheme include many such SNPs. Under this ascertainment scheme we observe a strong dependence of *F*ST estimate on the size of samples studied (see Figure S3).

Figure S4. Allele frequency dependence of *F*ST under different ascertainment schemes. The top panel shows *F*ST as a function of allele frequency in simulated populations when ascertaining in either the population subject to a recent expansion or the population subject to a recent bottleneck. We see that rare variants in the expansion population tend to have lower *F*ST than common variants, as they are overwhelmingly recent. The opposite is true when ascertaining in the bottleneck population, as rare variants tend to be highly differentiated ancestral variants that have higher *F*ST. Ascertainment in the out-group population removes dependence on minor allele frequency.

# Moment-based Estimator of Weir and Hill 2002 (WH)

The WH estimator is given in equation 9 of (Weir and Hill 2002), and corresponds to the conceptual definition given in the same paper. Essentially, this estimator corresponds to a sample size weighted average of population specific estimates. This can lead to variation with relative sample sizes. We show this by reproducing Figure S1 with an additional set of data-points added representing WH estimates. This figure shows that the WH estimator can be subject to extremely wide variation with sample size if populations have been subject to varied demographic history since divergence. We note that with large sample size differences estimates may even become negative (See Table S1). As human populations have been subject to variable demographic histories, we do not recommend the WH estimator for analyzing structure in human populations.

Figure S8. The purple line represents the WH estimator of *F*ST. It is clear from this that (1) for equal sample sizes, the WH, WC and Hudson estimators produce identical estimates and (2) under situations with variable demography, the WH estimator can produce very wide variation with the ratio of sample sizes. As human populations have been subject to variable demographic histories, we do not recommend the WH estimator for analyzing structure in human populations.

# Maximum-likelihood Estimator of Weir and Hill 2002 (WH-ML)

The WH-ML method of estimating *F*ST is based on equations 12 and 13 of (Weir and Hill 2002). However, Weir and Hill note that these equations only apply if sample sizes are “either equal or so large that they are approximately equal”. No equation is given for arbitrary sample sizes. We begin by analyzing equation 13.

Adapted for the case of two populations and biallelic SNPs, this equation is:

where is the sample allele frequency in population *i,* and is given by

Letting , we can simplify the estimator to

This quantity clearly depends upon the ratio of sample sizes. In fact, the difference between the minimum, when , and maxima, as or , is a factor of two. This property also applies to equation 12. Therefore, we do not recommend the application of estimators given in equation 12 or 13 to real data sets in the general case of unequal sample sizes.

If sample sizes are equal, then this simplifies to

with

This is identical to from the main text. However, as Weir and Hill suggest that estimates be “simply averaged over loci”, we believe that the WH-ML estimator is comparable, in the case of equal sample sizes, to Nei’s *F*ST combined over SNPs using an average of ratios. Use of an average of ratios will be highly sensitive to the inclusion of rare variants with low *F*ST, and Nei’s estimator will tend to overestimate *F*ST at single SNPs. As a result, we do not recommend the WH-ML approach for estimating *F*ST.

# Beta-Binomial Maximum-Likelihood Estimators (Balding)

In general, likelihood methods have the advantages that they can be more precise than moment-based methods, can have asymmetric confidence intervals around the mean, and can be used to construct a test for outlier loci. We evaluated two max-likelihood methods based on the beta-binomial distribution (Balding and Nichols 1995). The beta-binomial likelihood specifies that the distribution of population allele frequencies in current populations conditional on the ancestral allele frequency is beta:

where *p* is the allele frequency in the ancestral population and are allele frequencies in current populations. Additionally, derived allele counts in each sample are binomially distributed. A challenge when using this distribution is the unobserved ancestral allele frequency *p.* We evaluated two methods to address this via point estimates (D. Balding, personal communication):

1. We assume that the ancestral allele frequency is known. This is rarely the case in practice, but gives us insight into how well these types of methods can do if the ancestral allele frequency were known. In this case, we can write the likelihood given the observed data as

Here, are the derived allele count and total number of genotyped alleles at SNP *s* in population *i,* and *ps* is the ancestral allele frequency that is assumed known.

1. We use one of the current population allele frequencies as the ancestral allele frequency. That is, we assume

and estimate *F*ST In this case, we can write the likelihood given the observed data as

Again, are the derived allele count and total number of genotyped alleles at SNP *s* in population *i,* but the pseudo-ancestral allele frequency is estimated in the other population. (note that this method produces different estimates if or is used as ancestral, so both choices are used and the result is averaged).

Both of these likelihood functions can be maximized using standard numerical techniques (we use a grid search). While others have attempted to estimate *F*ST using beta-binomial by using MCMC (Holsinger 1999; Balding 2003), we note that these are max-likelihood estimators that do not suffer from the same performance issues as MCMC approaches.

We evaluated these methods using simple simulations, coalescent simulations, and 1000 Genomes data.

**Simple Simulations**

In these simulations, the ancestral allele frequency was chosen uniformly from the interval [0,1], current population allele frequencies were sampled from the beta distribution described above, and sample allele frequencies are subsequently from a binomial distribution. In this case, the data was generated according the model expected by the beta-binomial, with a uniform prior. Results are in the table below

| *F*ST | Method 1 | Method 2 | Hudson Estimator |
| --- | --- | --- | --- |
| 0.05 | 0.050 (0.008) | 0.049 (0.010) | 0.050 (0.014) |
| 0.1 | 0.10 (0.013) | 0.085 (0.015) | 0.098 (0.021) |
| 0.15 | 0.151 (0.017) | 0.120 (0.020) | 0.149 (0.028) |

We compared each of the beta-binomial max-likelihood estimation methods to the Hudson estimator, which we recommend in the main text. All of the methods perform well for *F*ST = 0.05, with the beta-binomial methods having a slightly smaller standard error than the moment-based Hudson estimator. As *F*ST increases, Method 1 and the Hudson estimator continue to perform well with the Hudson estimator having a larger standard error. Method 2, however, reports lower estimates as *F*ST gets large.

**Coalescent Simulations**.

The coalescent simulations were generated using GENOME (Liang et al. 2007) according to the demographic model specified below (See “Details of Coalescent Simulations” section for details). We evaluated the estimators using ascertainment in the outgroup population as well as in-sample ascertainment (including all SNPs polymorphic in either sample). Results are below.

| Ascertainment | *F*ST | Method 1 | Method 2 | Hudson Estimator |
| --- | --- | --- | --- | --- |
| In Sample | 0.19 | N/A | 0.306 (0.022) | 0.182 (0.027) |
| Outgroup | 0.19 | N/A | 0.244 (0.030) | 0.187 (0.027) |

As the ancestral allele frequency is unknown, Method 1 cannot be used in this comparison. If ascertainment is performed within the sample, including all of the rare variants, Method 2 performs poorly, overestimating *F*ST by about 50%. The Hudson estimator reports slightly lower estimates when performing in-sample ascertainment because of the effects of rare variants. When outgroup ascertainment is performed, the Method 2 estimates become closer to the value we expect, but are still overestimates. Hudson estimates are closer to the true value.

**1000 Genomes Data**

For all of these simulations 0.1% of the 1000 Genomes SNPs were randomly selected. We attempted two ascertainment schemes. For YRI-ascertainment, we compared CEU to CHB and, separately, CEU to TSI using SNPs ascertained as polymorphic in YRI. We also compared CEU-YRI, CEU-CHB, and CEU-TSI using all SNPs polymorphic in either sample. Results are below.

| Ascertainment | Comparison | Method 1 | Method 2 | Hudson Estimator |
| --- | --- | --- | --- | --- |
| In Sample | CEU-CHB | N/A | 0.117 | 0.105 |
| In Sample | CEU-YRI | N/A | 0.192 | 0.139 |
| In Sample | CEU-TSI | N/A | 0.0078 | 0.0038 |
| YRI | CEU-CHB | N/A | 0.100 | 0.108 |
| YRI | CEU-TSI | N/A | 0.0067 | 0.0036 |

As in the case of coalescent simulations, the ancestral allele frequency is unknown, and Method 1 cannot be used in this comparison. If ascertainment is performed within the sample, including all of the rare variants, Method 2 closely replicates Hudson estimates for CEU-CHB, but an estimate that is 50% higher for CEU-YRI and 100% higher for CEU-TSI. For YRI-ascertainment, the CEU-CHB result is nearly identical to that reported from the Hudson estimator, but the CEU-TSI result remains inflated. The CEU-YRI results were not reported because YRI-ascertainment does not approximate outgroup ascertainment for any comparison involving YRI.

Overall, our results show that while Method 1 performs well for the simplest simulations, it is not applicable for coalescent simulations and real data, where the ancestral allele frequency is unknown. Method 2 does well for simple simulations in which *F*ST is low. However, for larger values of *F*ST, Method 2 produces biased estimates for the simplest simulations, and coalescent simulations. For 1000 Genomes data, where we do not know the underlying value of *F*ST, Method 2 produces estimates that are different from estimates from the Hudson estimator. Method 2 is also sensitive to the choice of ascertainment—particularly the inclusion or exclusion of recent rare variants. We conclude that the beta-binomial max-likelihood methodology presents an exciting avenue of future research, including investigation of other possible ways to deal with ancestral allele frequencies (e.g. integrating over all possible ancestral allele frequencies). Currently, though, we believe that Hudson estimates are more accurate and stable in the face of differing ascertainment schemes.

# Beta-Binomial MCMC Estimator (Holsinger)

To assess the properties of Holsinger’s Bayesian method of estimating *F*ST we re-ran a subset of the experiments on simulated coalescent data. In these experiments three populations that diverged 2000 generations ago were generated using the GENOME coalescent simulator: (1) a population that underwent a recent bottleneck—the bottleneck population (2) a population that underwent a recent expansion—the expansion population, and (3) a population that evolved according to a standard Wright-Fisher model—the outgroup population. We simulated 2500 individuals from each population. We analyzed 1000 SNPs in the main analysis, and varied the number of SNPs in the runtime analysis. To estimate *F*ST we used Holsinger’s Hickory software (Hickory 1.1 http://darwin.eeb.uconn.edu/hickory/hickory.html), and report theta-II from the full model as *F*ST. In the documentation of Hickory, theta-II is listed as “directly comparable to estimates of *F*ST based on Weir and Cockerham’s approach”.

*Variation with Sample Size*

We ran Hickory on 100 SNPs that were selected to be polymorphic in the outgroup population and have MAF > 5% in both populations. While we do not believe this particular ascertainment scheme to be desirable, inclusion of variants that were had MAF of 0 in either population caused *F*ST estimates to increase substantially (See below). To assess whether *F*ST varied with relative sample size, we estimated *F*ST in various sample size configurations. We report the estimate and standard errors for each of these approaches. Overall, we do not observe significant variation with absolute or relative sample size. We consider this to be a desirable property of the Holsinger method.

| n1 | n2 | *F*ST Estimate | Std. Error |
| --- | --- | --- | --- |
| 50 | 5000 | 0.140 | 0.0186 |
| 5000 | 50 | 0.147 | 0.0194 |
| 5000 | 5000 | 0.1430 | 0.0057 |

*Sensitivity to Rare Variants*

If SNPs are ascertained in an outgroup population, we expect an *F*ST of 0.190 according to population genetic theory. This is approximately what we observe from the Hudson estimator when using a ratio of average approach to combine estimates across SNPs. However, Holsinger’s Bayesian method does not produce values that are similar to this. When run on 1000 SNPs selected to be polymorphic in an outgroup, we obtained a value of 0.287 (95% confidence interval: 0.264-0.311). The difference between this estimate and the expected value of 0.190 is statistically significant. If we restrict to the set of SNPs which are at 5% MAF or higher in both populations (in addition to being polymorphic in the outgroup), we obtain an *F*ST estimate of .0.143 (95% confidence interval: 0.132-0.155). While more concordant with our expectations under population genetic theory, such an ascertainment produces a downward bias as it removes some of the most differentiated SNPs. We caution that sequence data contains numerous variants that are private or rare in one or both populations studied. Thus, we do not recommend the Holsinger method for application to sequencing data sets.

*Runtime Analysis*

We ran Hickory on 10, 100, and 1000 SNPs that were selected to be polymorphic in the outgroup population and at least one of the bottleneck and expansion populations. For each of these runs we report runtime on a set of 50, 200, 500, or 5000 individuals.

|  | # of Samples | | | |
| --- | --- | --- | --- | --- |
| # SNPs | 50 | 200 | 500 | 5000 |
| 10 | 63 | 72 | 76 | 84 |
| 100 | 714 | 734 | 833 | 898 |
| 1000 | 8400 | 8280 | 8525 | 8475 |

From this we conclude that the runtime is roughly constant in the number of samples but linear in the number of SNPs. Extrapolating this to a modern data set of approximately 107 markers (similar to the number of markers in 1000 Genomes data), we expect a runtime of ~8x107 seconds, or approximately 2.5 years of CPU time. , Including Holsinger’s method in Table S1 would take approximately 1500 CPU years (2.5 years * (16 choose 2) pairs of populations * 5 ascertainment schemes). Therefore, the computational requirements of Holsinger’s Bayesian method to estimate *F*ST severely limit its applicability to modern data sets.

# Sampling Common SNPs from 1000 Genomes

To demonstrate that common SNPs in the 1000 Genomes data have different population genetic properties than HapMap3 SNPs of the same frequency spectrum, we selected a random subset of 1000 Genomes SNPs according to the allele frequency spectrum of the HapMap3 SNPs, binned into 1% minor allele frequency bins. Specifically, we used Bayes rule to derive the probability of selecting a SNP with frequency *f*:

where, probability of frequency *f* in the HapMap3 SNPs,

andis the probability of frequency *f* in the 1000 Genomes SNPs. Then, given we analyzed each 1000 Genomes SNP independently and included it with this probability. The allele frequency spectrum for both HapMap and 1000 Genomes data was produced by analyzing data from the YRI population. SNPs that were not polymorphic in YRI were not used as part of the *F*ST estimate between CEU and CHB. We performed this subsampling 10 separate times to produces 10 sets of SNPs matching the HapMap3 allele frequency spectrum in YRI. These 10 sets of SNPs were used to separately estimate *F*ST between CEU and CHB.

# Weir and Cockerham’s *F*ST (WC)

*Conceptual Definition*

Weir and Cockerham (Weir and Hill 2002; Weir and Cockerham 1984) used a conceptual definition provided by Wright (Weir and Cockerham 1984; Wright 1949) and Cockerham (Nei 1973; Cockerham 1969) of *F*ST as a ratio of variances. We analyze this conceptual definition for a single biallelic SNP in two populations. Let be the allelic value of a single haploid *j* chosen at random from population *i*. Then, according to Cockerham,

|  |  |
| --- | --- |

where is the population allele frequency of the “1” allele in the ancestral population. Equivalent to a ratio of variances, the conceptual definition of *F*ST is the correlation between alleles drawn randomly from the same population. We can rewrite this in terms of population allele frequencies as

|  |  |
| --- | --- |

where is the population allele frequency of population *i.*

We make two comments about this conceptual definition. First, there is a single *F*ST parameter as opposed to an *F*ST parameter for each population. This parameterization assumes that *F*ST is identical across populations, and suggests that current populations are replicates for the same evolutionary process (Hudson et al. 1992; Weir and Cockerham 1984; Keinan et al. 2007). If this assumption does not hold—and it may be unlikely to hold in practice (Weir and Cockerham 1984; Nei 1986; International HapMap 3 Consortium 2010)—the conceptual definition no longer applies. Weir and Hill (1000 Genomes Project Consortium 2010; Weir and Hill 2002) relaxed this assumption, generalizing to:

|  |
| --- |

Our second comment applies both to Cockerham’s original conceptual definition and Weir and Hill’s modified version. The relationship described by is only true if the SNP was polymorphic in the ancestral population. For the equalities to hold and *F*ST to be a correlation, we must ascertain only SNPs that were polymorphic in the ancestral population, excluding most rare variants. While it is possible to apply the WC estimator to SNPs that do not fit this criterion, such an estimate will not correspond to the conceptual definitions that are described. We analyze all estimators of *F*ST using the more general conceptual definition of (Ramírez-Soriano and Calafell 2008; Weir and Hill 2002; Albrechtsen et al. 2010).

*Estimator*

We show that the WC estimator, in a setting of population specific *F*ST, will result in estimates that vary with the ratio of sample sizes. While Weir and Hill proposed a modified estimator to account for population specific *F*ST, their estimator also has the property that “the quantities being estimated depend on the sample sizes”. Because it is highly cited and also has this property, we focus on the WC estimator. We are particularly interested in its behavior in the limit of large sample size—the quantity being estimated.

Consider a biallelic SNP in a sample of individuals from 2 populations. The WC estimator is:

|  |  |
| --- | --- |

where is the sample size and is the sample allele frequency in population *i* for *.* Then, in the limit of large sample sizes (), we can assume that sample allele frequencies become close to population allele frequencies (). We analyze the estimator as the sample sizes increase, but their ratio goes to a constant *M* (see below for a derivation). That is, the quantity being estimated is:

|  |  |
| --- | --- |

where is the population allele frequency in population *i* for . We now wish to convert from a mathematical function of allele frequencies, as in equation s2, to a mathematical function of *F*ST. To do this, we consider *expectations* *over the evolutionary process* of the numerator and denominator of equation s2 using the equations described by Weir and Hill. Following Weir and Cockerham, we do this separately for the numerator and denominator. For the numerator,

|  |
| --- |

However, if we assume that the drift between the ancestral population and population 1 is independent of the drift between the ancestral population and population 2 (Clark et al. 2005; Cockerham 1969; Barreiro et al. 2008; Weir and Cockerham 1984; Hernandez et al. 2011), we can ignore the final term and we have:

|  |
| --- |

where and are defined with respect to the ancestral population. Now, for the denominator:

|  |
| --- |

Dividing these, we see that

|  |  |
| --- | --- |

If the sample sizes are equal, , then the estimate becomes

|  |
| --- |

Also, when *F*ST is identical for both populations, i.e. , it is straightforward to see that , i.e. the estimate will not depend upon the ratio of sample sizes (*M*). If the sample sizes are unequal or this assumption does not hold, however, the estimate will depend upon the ratio of sample sizes underlying the limit. Given the complexity of human population history, it is unlikely that this assumption will hold in general. This means that even if large numbers of samples and SNPs are used to estimate *F*ST between a pair of populations, this estimate may not be comparable across studies with different sample sizes.

# Derivation of WC Quantity Being Estimated

We follow the exposition of the estimator of *F*ST () provided in (Weir and Cockerham 1984) simplifying to the case of 2 populations with large sample size. We avoid sample size considerations and use the estimator provided on the top of page 1362 to demonstrate it’s properties in the limit of large sample size. In the limit of large sample size, Weir and Cockerham give the following simplified estimator of *F*ST:

|  |  |
| --- | --- |

For the simplified case of a bialleleic SNP in two populations, the variables used in equation s17 are defined as:

|  |  |
| --- | --- |
|  |  |

Now, equation s18, *s2*, gives us a simplified expression for the numerator in the estimator of *F*ST (s17) Now we examine the denominator.

|  |  |
| --- | --- |

Expanding this gives a simplified expression for the denominator of equation s17.

|  |  |
| --- | --- |

In the limit of large sample sizes, we replace the sample allele frequencies with the true population allele frequencies. That is, and we make this replacement.

Then, the estimator of *F*ST is given by

|  |  |
| --- | --- |

Now, if , then we can restate this as

|  |  |
| --- | --- |

# Nei’s *F*ST

*Conceptual Definition*

Nei (Schaffner et al. 2005; Nei 1986) defined *F*ST (he used the term *G*ST) based upon the gene diversity between and within populations as

|  |  |
| --- | --- |

where is the average gene diversity between populations and is the diversity in the total population. Also, Nei’s term “gene diversity” is identical to heterozygosity in a randomly mating population. This conceptual definition is distinct from Wright’s in that it makes no assumption about the evolutionary process that led to the current allele frequencies, nor does it assume that SNPs were polymorphic in the ancestral population. This lack of assumptions means that *F*ST estimated according to Nei can always be interpreted as a ratio of gene diversity between populations to total gene diversity. However, this is also the basis for Cockerham and Weir’s discussion of Nei’s *F*ST as a statistic from data—as opposed to a parameter of the evolutionary process (Weir et al. 2005; Cockerham and Weir 1986; McVicker et al. 2009). Holsinger and Weir wrote that Nei’s *F*ST “does not account for genetic sampling”, and that in general, the WC *F*ST “will be a more appropriate measure of differentiation” (Weir and Hill 2002; Holsinger and Weir 2009). We believe that viewing *F*ST as a parameter of the evolutionary enables valuable insights about demographic history and, in general, we side with Cockerham and Weir (Holsinger 1999; Cockerham 1969; Cockerham and Weir 1986). However, if one is interested in properties of the sample being studied, then Nei’s estimator may prove more appropriate (see below). While we are interested in the case of 2 populations, we note that the WC and Nei quantities being estimated are identical in the case large numbers of populations (1000 Genomes Project Consortium 2010; Weir and Cockerham 1984).

To better understand the relationship between Nei’s *F*ST and the WC *F*ST, we analyze both estimators using the same conceptual definition (Keinan et al. 2007; Weir and Hill 2002). This will give us a common basis for comparing the asymptotic behavior of estimators. We note that this analysis imposes the restriction that analyzed SNPs were polymorphic in the ancestral population. Nei did not impose this restriction in his analysis.

*Estimator*

In the case of two alleles at a locus, Nei’s estimator is

|  |  |
| --- | --- |

where

|  |
| --- |

and is the sample allele frequency in population *i* for . We note that this is Nei’s updated estimator and, for the case of two populations, differs from the estimator given in (Clark et al. 2005; Nei 1973; Albrechtsen et al. 2010; Nei and Chesser 1983) by a factor of 2. We use the estimator given in (1000 Genomes Project Consortium 2010; Nei 1986) as it is most closely related to the other estimators considered. We note that Nei claimed that his estimator was “identical to Wright’s *F*ST” (Weir and Cockerham 1984; Nei 1973). We examine this claim in detail below.

Although this estimator is invariant to sample sizes, it is not related to underlying *F*ST parameters in a standard way. To show this, we again analyze the estimator in the limit of large samples sizes, as sample allele frequencies become close to population allele frequencies (). That is, the Nei quantity being estimated is:

|  |  |
| --- | --- |

We examine expectations over the evolutionary process of the numerator and denominator separately, as above. It is clear that the expected value of the numerator is identical to that for the WC *F*ST estimator:

|  |
| --- |

Examining the denominator in a similar way gives:

|  |
| --- |

Then, dividing these two, we have

|  |  |
| --- | --- |

with a maximum value of 2 as . This overestimates *F*ST and alters the relation from *F*ST to divergence time (see below). Estimates of *F*ST given for the Nei estimator were generated using the proposed estimator for the numerator (see below) and a simple estimator for the denominator.

# Hudson’s *F*ST

*Conceptual Definition*

Hudson (Jost 2008; Hudson et al. 1992) defined *F*ST in terms of heterozygosity. We note that Nei first conceptualized *F*ST in these terms. However, Nei’s method of estimation was slightly different from Hudson’s. Specifically, Hudson’s estimator analyzed the gene diversity—or heterozygosity in a randomly mating population—*between* populations, while Nei analyzed the *total* gene diversity.

*Estimator*

Hudson’s estimator for *F*ST is given by

|  |  |
| --- | --- |

where is the mean number of differences within populations, and is the mean number of differences between populations. While Hudson did not give explicit equations for and, we cast his description into an explicit estimator (see above for a derivation). The estimator that we analyze is:

|  |  |
| --- | --- |

where is the sample size and is the sample allele frequency in population *i* for *.* As before, we consider this estimator in the limit of large sample sizes

|  |  |
| --- | --- |

Again, the expected value over the evolutionary process of the numerator is identical to that for the WC *F*ST estimator:

|  |
| --- |

Examining the denominator in a similar way gives:

|  |
| --- |

This is made clear from the fact that allele frequencies in one population are independent of those in the other. Then, dividing these two, we have

|  |  |
| --- | --- |

This estimator has the desirable properties that it is (1) independent of sample composition and (2) does not overestimate *F*ST (it has a maximum value of 1). We recommend its use to produce estimates of *F*ST.

# Details of Coalescent Simulations

We simulated several populations to test the effects of changes in methods on estimates of *F*ST. We used the GENOME (Ryman and Leimar 2009; Liang et al. 2007) software package to perform the simulations. Three populations were simulated that all diverged from each other 1000 generations ago. The first population was subject to an expansion from an effective population size of 104 to an effective population size of 105, occurring 300 generations ago. The second population was subject to a reduction from an effective population size of 104 to an effective population size of 1000, also occurring 300 generations ago. The third population was not subject to any demographic events and followed a Wright-Fisher model of neutral drift with a constant effective population size of 104 and this population was used as an out-group to perform ascertainment of SNPs. The rate of mutation was set to 10-8 for all simulations. We also performed simulations without expansions or bottlenecks to showcase some effects of estimation (see below). These effective population sizes are similar to those described in (Jost 2008; Schaffner et al. 2005). We also analyzed the effect of migration on the relationship between *F*ST and divergence time (see below). Separately, we explored the effects of *F*ST estimator and use of models of neutral drift on studies of selection (See above).

# Simple Demographic Simulations

We used the coalescent-with-recombination simulator GENOME (Hudson et al. 1992; Liang et al. 2007; Keinan et al. 2007) to simulate populations that had very simple demographic history. We simulated three populations, all of which diverged from one another 2000 generations ago with a constant effective population size of 10000 since divergence. Additionally, these populations were subject to only neutral drift according to a Wright-Fisher model. These populations were used to test properties of *F*ST under scenarios that did not involve complex demographic events. *F*ST was estimated between population 1 and population 2. Population 3 was used as an out-group to perform ascertainment. Using ascertainment in an out-group, this demography allows us to calculate an expected *F*ST of 0.181. We obtain estimates of 0.183 (s.e. 0.004), 0.201 (s.e. 0.004), and 0.183 (s.e. 0.004) when applying the WC, Nei, or Hudson estimator, respectively. As expected, the identical demographic history for these populations leads to equivalent WC and Hudson estimates, while Nei estimates are inflated.

# Simulations Including Migration

In order to assess the effect of migration on estimates of *F*ST, we performed simulations that varied the migration rate. These simulations were identical to those described above, with the addition of migration. Without migration we would expect an *F*ST of 0.190. The migration rate was varied from 10-4 to 10-1. The results are plotted below in Figure S5. These results showcase that as migration rate increases, estimated *F*ST decreases for two populations independent of their divergence time. As a result, the relationship between divergence time and *F*ST is lost.

However, our remaining results are largely unchanged. Specifically, WC estimates continue to depend upon the ratio of sample sizes (see Figure S6), while Nei estimates are consistently inflated. Also, use of the average of ratios produces artificially reduced estimates, especially when analyzing large numbers of rare SNPs. (see Figure S7). Both of these analyses were performed with a migration rate of 10-3.

Figure S5. This clearly shows that as migration rate increases, the estimate of *F*ST decreases from its predicted value in the setting of no migration. This is to be expected as populations become more similar with increasing migration. While Wright did describe a relationship between *F*ST and migration, this applied only in the context of a theoretical model of isolation by distance.

Figure S6. This is analogous to Figure S1 and shows that in a setting with significant migration, WC estimates still depend upon the ratio of sample sizes. Also, Nei estimates remain elevated relative to Hudson estimates.

Figure S7. This is analogous to Figure S3 and showcases several important findings. Namely, an average of ratios still results in a large reduction relative to a ratio of averages. The effect of ascertainment is small, but statistically significant, even using a ratio of averages. Also, an average of ratios results in a dependence of *F*ST on sample size used to estimate it. Without migration, sample size dependence only occurs if a permissive ascertainment scheme is used. However, with migration sample size dependence is observed even if an outgroup ascertainment scheme is used. This underscores the importance of using a ratio of averages.

# Correspondence Between Nei’s Estimator and Wright’s *F*ST

Nei (Cockerham 1969; Nei 1973) wrote that his estimator was “equivalent to Wright’s *F*ST”. This equivalence has been separately claimed by (Nei 1986; Liang et al. 2007; Cockerham 1969; Weir and Cockerham 1984) who provide a different estimator. We believe that the confusion lies in whether the “total variance” is estimated in populations studied or in an ancestral population. This distinction has been previously noted by (Nei 1973; Cockerham and Weir 1986; Nei and Chesser 1983). It is challenging to discern Wright’s intent as he refers to a “total population” without giving a means to estimate allele frequencies in this population. If we are to believe Nei, then the “total population” is the combined set of populations being currently studied and allele frequencies in the total population are sample allele frequencies. If we are to believe Cockerham and Weir, then the “total population” is an ancestral population and allele frequencies in this population must be estimated according to a specified evolutionary model. For the purposes of Table S2 we agree with Cockerham and Weir.

However, what if one were interested in properties of the sample? If one were interested in the proportion of genotypic variance in the *sample* that is explained by population label, and equal sample sizes were used Nei’s estimator would be more appropriate. If there are unequal sample sizes, it is possible to modify the estimator given in the main text to use a sample size weighted average of allele frequencies.

# Table S1. All 1000 Genomes Pairs

*F*ST between all pairs of 1000 Genomes populations was estimated using each of four estimators:

- WC
- Nei
- Hudson
- WH

each of two averaging methods:

- Ratio of Averages
- Average of Ratios

and ascertaining for SNPs that are polymorphic in one of:

- Population 1
- Population 2
- Both population 1 & population 2
- Either population 1 OR population 2
- YRI (This may or may not be an out-group)

All told, there are (16 choose 2) pairs x 4 x 2 x 5 = 4800 *F*ST estimates and the corresponding standard errors. Because of this very large number of *F*ST estimates, we have provided Table S1 as a separate excel spreadsheet that can be used to easily search, sort, and filter results that are of interest.

# Table S2. Correspondence between Definitions and Estimators

| **Conceptual definition** | **Citation(s)** | **Evolutionary Assumptions** | **Corresponds With Estimator** | | |
| --- | --- | --- | --- | --- | --- |
| **WC** | **Nei** | **Hudson** |
| Ratio of variances/Correlation between alleles | Wright 1949;  Cockerham 1969;  Weir and Cockerham 1984 | SNPs analyzed were polymorphic in the ancestral population | *F*ST is identical across populations OR Equal sample sizes* | Noc | Yes* |
| Ratio of gene diversity/heterozygosity | Nei 1973; Nei 1986 |  | No | Yes* | No |
| Hudson 1992 |  | Only if equal sample sizes* | No | Yes* |
| Ratio of coalescent timesa | Slatkin 1991 | SNPs analyzed were polymorphic in the ancestral population | No | No | No |
| Transform of Divergence Time | Cavalli-Sforza and Bodmer 1971;  Weir and Hill 2002 | SNPs analyzed were polymorphic in the ancestral population; No migration or admixture | Only if equal sample sizes* | No | Yes* |
| Transform of Migration Rate | Wright 1949 | Finite Island Modelb | Yes* | No | No |

* This correspondence is valid subject to the evolutionary assumptions that underlie the conceptual definition. For example, if SNPs analyzed are not polymorphic in the ancestral population, then estimates produced using the WC estimator *will not* be the correlation that (Nei 1986; Wright 1949; Cockerham 1969) described.

Table S2. We describe five conceptual definitions of *F*ST and their correspondence with the three moment-based estimators studied. This correspondence depends upon a series of assumptions about evolutionary history and sampling that may or may not hold in application to real data. The “Evolutionary Assumptions” are assumptions that must hold for any estimator to correspond to that conceptual definition. The columns labeled “WC”, “Nei” and “Hudson” contain a Yes, No, or “Only if equal sample sizes” for each conceptual definition. This indicates if the estimator and definition correspond, or if sample sizes must be equal for a correspondence. (a) We note that Slatkin’s conceptual definition of *F*ST corresponds to Nei’s original estimator of *F*ST (Price et al. 2009; Nei 1973; Bhatia et al. 2011) but not to Nei’s updated estimator (Hudson et al. 1992; Nei 1986), which is what we analyze here. (b) The finite island model is a theoretical model of isolation by distance that includes numerous assumptions including that *F*ST (in this case influenced by effective population size and migration rate) is identical across populations. (c) We note that Nei describes his estimator as “equivalent to Wright’s *F*ST” (Reynolds et al. 1983; Nei 1973; Weir and Cockerham 1984). We do not agree. Specifically, we believe that Nei’s *F*ST estimates properties of the sample as opposed to the ancestral population (see Supplementary Material for details).

# Table S3. Estimating *F*ST With Varying Sample Sizes

|  |  | *F*ST Estimator | | | | | |
| --- | --- | --- | --- | --- | --- | --- | --- |
| Sample Sizes | | WC | | Nei | | Hudson | |
| n1 | n2 | Est. | Std. Error | Est. | Std. Error | Est. | Std. Error |
| 2500 | 2500 | 0.187 | 4.93E-03 | 0.206 | 6.00E-03 | 0.187 | 4.93E-03 |
| 25 | 2500 | 0.218 | 6.30E-03 | 0.206 | 7.02E-03 | 0.186 | 5.75E-03 |
| 2500 | 25 | 0.164 | 4.95E-03 | 0.204 | 5.07E-03 | 0.185 | 4.68E-03 |

Table S3. Here we assess the effect of sample size and estimator on the resulting genome-wide estimate of *F*ST. These estimates should be compared with a value of 0.190 expected given the demographic history specified and a population split 1000 generations ago (see above). We see that with equal sample sizes, the WC and Hudson estimators result in identical estimates that are in accordance with the expected result. When the sample sizes are altered, the WC estimates become biased, with the direction of bias depending upon the relative sample sizes. While the Nei estimator is insensitive to sample sizes, it consistently produces an upwardly biased estimate of *F*ST.

# Table S4. Effects of *F*ST estimator in the case of very simple demography

|  |  | *F*ST Estimator | | | | | |
| --- | --- | --- | --- | --- | --- | --- | --- |
| Sample Sizes | | WC | | Nei | | Hudson | |
| n1 | n2 | Est. | Std. Error | Est. | Std. Error | Est. | Std. Error |
| 2500 | 2500 | 0.183 | 3.52E-03 | 0.201 | 4.27E-03 | 0.183 | 3.52E-03 |
| 25 | 2500 | 0.181 | 5.29E-03 | 0.196 | 6.45E-03 | 0.177 | 5.32E-03 |
| 2500 | 25 | 0.179 | 4.83E-03 | 0.196 | 5.83E-03 | 0.179 | 4.83E-03 |

We assessed the effects of *F*ST estimator on estimates between populations simulated with simple demographic history (See above). In these instances, and with ascertainment in an out-group, we expect the WC and Hudson estimates to be identical and the Weir estimate to be independent of relative sample size. If the drift time of population 1 is equal to the drift time of population 2 then, the relationship between *F*ST and divergence time is the same between the WC and Hudson estimators and matches the results reported in (1000 Genomes Project Consortium 2010; Cavalli-Sforza and Bodmer 1971; Weir and Hill 2002). The estimator of Nei (International HapMap 3 Consortium 2010; Nei 1986) remains elevated relative to the others though, and continues to be independent of sample size. In the above simulations, we focused on a more complex demographic scenario to illustrate properties of rare variants.

# Table S5. Effects of averaging and ascertainment in the case of very simple demography

| Polymorphic In | Ratio of Averages | | Average of Ratios | |
| --- | --- | --- | --- | --- |
| OUTGROUP | 0.183 | 3.52E-03 | 0.139 | 2.15E-03 |
| POP1 | 0.167 | 2.64E-03 | 0.052 | 5.94E-04 |
| POP2 | 0.169 | 2.77E-03 | 0.052 | 6.02E-04 |
| POP1 AND POP2 | 0.168 | 3.21E-03 | 0.130 | 1.27E-03 |
| POP1 OR POP2 | 0.169 | 2.46E-03 | 0.041 | 4.38E-04 |

Here we vary both the ascertainment and averaging method in the case of very simple demography. Here it becomes clear that ascertainment in the populations studied results in an exclusion of some of the most diverged SNPs and a smaller *F*ST estimate. As *F*ST can be estimated from any set of SNPs, we do not view this as incorrect, but motivating for future publications of *F*ST estimates to include details of ascertainment scheme. When using an average of ratios, we see large reductions in *F*ST for all ascertainment schemes and a large variation between different ascertainment schemes. Indeed, if for a permissive ascertainment scheme (POP1 or POP2) an estimate of 0.169 from a ratio of averages drops more than four-fold when using an average of ratios. The large variation between estimates from an average of ratios suggests that these estimates are essentially unrelated to the population demographic history, and that an average of ratios should be avoided in even the simplest demographic scenarios.

# Table S6. Effects of averaging and ascertainment

| Polymorphic In | Ratio of Averages | | Average of Ratios | |
| --- | --- | --- | --- | --- |
| POP1 | 0.172 | 3.05E-03 | 0.018 | 2.96E-04 |
| POP2 | 0.185 | 2.05E-03 | 0.115 | 7.45E-04 |
| POP1 AND POP2 | 0.176 | 3.16E-03 | 0.138 | 9.18E-04 |
| POP1 OR POP2 | 0.180 | 3.02E-03 | 0.020 | 3.30E-04 |

Table S6. We compare different ascertainment schemes and combination methods under a scenario of differing demography. In this simulation population 1 was subject to a recent expansion and population 2 was subject to a recent bottleneck. These estimates should be compared with a value of 0.190 expected given the demography specified (see above), a population split 1000 generations ago, and ascertainment in an out-group population. It is clear that the effect of ascertainment depends on the demographic history of the populations studied. While the effect of ascertainment when using a ratio of averages is statistically significant, we observe a much larger effect due to ascertainment when using an average of ratios. Specifically, because of the recent expansion of population 1, it contains many rare, recent variants with low *F*ST. Inclusion of these variants in an average of ratios produces a dramatically reduced genome-wide *F*ST estimate.

# References

1000 Genomes Project Consortium. 2010. A map of human genome variation from population-scale sequencing. *Nature* **467**: 1061–1073.

Akey JM. 2009. Constructing genomic maps of positive selection in humans: where do we go from here? *Genome Res* **19**: 711–722.

Albrechtsen A, Nielsen FC, Nielsen R. 2010. Ascertainment biases in SNP chips affect measures of population divergence. *Molecular biology and evolution* **27**: 2534–2547.

Balding DJ. 2003. Likelihood-based inference for genetic correlation coefficients. *Theor Popul Biol* **63**: 221–230.

Balding DJ, Nichols RA. 1995. A method for quantifying differentiation between populations at multi-allelic loci and its implications for investigating identity and paternity. *Genetica* **96**: 3–12.

Barreiro LB, Laval G, Quach H, Patin E, Quintana-Murci L. 2008. Natural selection has driven population differentiation in modern humans. *Nature genetics* **40**: 340–345.

Beaumont MA, Balding DJ. 2004. Identifying adaptive genetic divergence among populations from genome scans. *Mol Ecol* **13**: 969–980.

Bhatia G, Patterson N, Pasaniuc B, Zaitlen N, Genovese G, Pollack S, Mallick S, Myers S, Tandon A, Spencer C, et al. 2011. Genome-wide comparison of African-ancestry populations from CARe and other cohorts reveals signals of natural selection. *Am J Hum Genet* **89**: 368–381.

Bickel PJ, Doksum KA. 2006. *Mathematical Statistics, Basic Ideas and Selected Topics, Vol. 1*. 2nd ed. Prentice Hall.

Cavalli-Sforza LL, Bodmer WF. 1971. *The genetics of human populations*. W.H. Freeman, San Francisco.

Clark AG, Hubisz MJ, Bustamante CD, Williamson SH, Nielsen R. 2005. Ascertainment bias in studies of human genome-wide polymorphism. *Genome research* **15**: 1496–1502.

Cockerham CC. 1969. Variance of Gene Frequencies. *Evolution* **23**: 72–84.

Cockerham CC, Weir BS. 1986. Estimation of inbreeding parameters in stratified populations. *Ann Hum Genet* **50**: 271–281.

Edelaar P, Alonso D, Lagerveld S, Senar JC, Björklund M. 2012. Population differentiation and restricted gene flow in Spanish crossbills: not isolation-by-distance but isolation-by-ecology. *Journal of Evolutionary Biology* **25**: 417–430.

Ellstrand NC, Elam DR. 1993. Population Genetic Consequences of Small Population Size: Implications for Plant Conservation. *Annual Review of Ecology and Systematics* **24 IS -**: 217–242.

Foll M, Gaggiotti O. 2008. A genome-scan method to identify selected loci appropriate for both dominant and codominant markers: a Bayesian perspective. *Genetics* **180**: 977–993.

Guries RP, Ledig FT. 1982. Genetic Diversity and Population Structure in Pitch Pine (Pinus rigida Mill.). *Evolution* **36**: 387–402.

Hangartner S, Laurila A, Räsänen K. 2012. Adaptive divergence in moor frog (Rana arvalis) populations along an acidification gradient: inferences from Q(st) -F(st) correlations. *Evolution* **66**: 867–881.

Hernandez RD, Kelley JL, Elyashiv E, Melton SC, Auton A, McVean G, 1000 Genomes Project, Sella G, Przeworski M. 2011. Classic selective sweeps were rare in recent human evolution. *Science* **331**: 920–924.

Holsinger KE. 1999. Analysis of Genetic Diversity in Geographically Structured Populations: A Bayesian Perspective. *Hereditas* **130**: 245–255.

Holsinger KE, Weir BS. 2009. Genetics in geographically structured populations: defining, estimating and interpreting F(ST). *Nature reviews Genetics* **10**: 639–650.

Hudson RR, Slatkin M, Maddison WP. 1992. Estimation of levels of gene flow from DNA sequence data. *Genetics* **132**: 583–589.

International HapMap 3 Consortium. 2010. Integrating common and rare genetic variation in diverse human populations. *Nature* **467**: 52–58.

International HapMap Consortium. 2007. A second generation human haplotype map of over 3.1 million SNPs. *Nature* **449**: 851–861.

Jin W, Xu S, Wang H, Yu Y, Shen Y, Wu B, Jin L. 2012. Genome-wide detection of natural selection in African Americans pre- and post-admixture. *Genome Res* **22**: 519–527.

Jost L. 2008. GST and its relatives do not measure differentiation. *Mol Ecol* **17**: 4015–4026.

Keinan A, Mullikin JC, Patterson N, Reich D. 2007. Measurement of the human allele frequency spectrum demonstrates greater genetic drift in East Asians than in Europeans. *Nature genetics* **39**: 1251–1255.

Lewontin RC, Krakauer J. 1973. Distribution of gene frequency as a test of the theory of the selective neutrality of polymorphisms. *Genetics* **74**: 175–195.

Li JZ, Absher DM, Tang H, Southwick AM, Casto AM, Ramachandran S, Cann HM, Barsh GS, Feldman M, Cavalli-Sforza LL, et al. 2008. Worldwide human relationships inferred from genome-wide patterns of variation. *Science* **319**: 1100–1104.

Liang L, Zöllner S, Abecasis GR. 2007. GENOME: a rapid coalescent-based whole genome simulator. *Bioinformatics* **23**: 1565–1567.

Malécot G. 1948. Les mathématiques de l'hérédié. *Masson*.

McEvoy BP, Montgomery GW, McRae AF, Ripatti S, Perola M, Spector TD, Cherkas L, Ahmadi KR, Boomsma D, Willemsen G, et al. 2009. Geographical structure and differential natural selection among North European populations. *Genome Res* **19**: 804–814.

McVicker G, Gordon D, Davis C, Green P. 2009. Widespread genomic signatures of natural selection in hominid evolution. *PLoS Genet* **5**: e1000471.

Nei M. 1973. Analysis of Gene Diversity in Subdivided Populations. *Proceedings of the National Academy of Sciences* **70**: 3321–3323.

Nei M. 1986. Definition and Estimation of Fixation Indices. *Evolution* **40**: 643–645.

Nei M, Chesser RK. 1983. Estimation of fixation indices and gene diversities. *Ann Hum Genet* **47**: 253–259.

Nicholson G, Smith AV, Jonsson F, Gústafsson Ó, Stefansson K, Donnelly P. 2002. Assessing population differentiation and isolation from single-nucleotide polymorphism data. *Journal of the Royal Statistical Society: Series B (Statistical Methodology)* **64**: 695–715.

Palumbi SR, Baker CS. 1994. Contrasting population structure from nuclear intron sequences and mtDNA of humpback whales. *Molecular biology and evolution* **11**: 426–435.

Pickrell JK, Coop G, Novembre J, Kudaravalli S, Li JZ, Absher D, Srinivasan BS, Barsh GS, Myers RM, Feldman MW, et al. 2009. Signals of recent positive selection in a worldwide sample of human populations. *Genome Res* **19**: 826–837.

Price AL, Helgason A, Palsson S, Stefansson H, St Clair D, Andreassen OA, Reich D, Kong A, Stefansson K. 2009. The impact of divergence time on the nature of population structure: an example from Iceland. *PLoS Genet* **5**: e1000505.

Ramírez-Soriano A, Calafell F. 2008. FABSIM: a software for generating FST distributions with various ascertainment biases. *Bioinformatics* **24**: 2790–2791.

Reich D, Thangaraj K, Patterson N, Price AL, Singh L. 2009. Reconstructing Indian population history. *Nature* **461**: 489–494.

Reynolds J, Weir BS, Cockerham CC. 1983. Estimation of the coancestry coefficient: basis for a short-term genetic distance. *Genetics* **105**: 767–779.

Ryman N, Leimar O. 2009. G(ST) is still a useful measure of genetic differentiation - a comment on Jost's D. *Mol Ecol* **18**: 2084–7– discussion 2088–91.

Schaffner SF, Foo C, Gabriel S, Reich D, Daly MJ, Altshuler D. 2005. Calibrating a coalescent simulation of human genome sequence variation. *Genome Res* **15**: 1576–1583.

Selander RK, Hudson RO. 1976. Animal Population Structure Under Close Inbreeding: The Land Snail Rumina in Southern France. *The American Naturalist* **110**: 695–718.

Slatkin M. 1991. Inbreeding coefficients and coalescence times. *Genetics Research* **58**: 167.

Teo Y-Y, Sim X, Ong RTH, Tan AKS, Chen J, Tantoso E, Small KS, Ku C-S, Lee EJD, Seielstad M, et al. 2009. Singapore Genome Variation Project: a haplotype map of three Southeast Asian populations. *Genome Res* **19**: 2154–2162.

Weir BS, Cardon LR, Anderson AD, Nielsen DM, Hill WG. 2005. Measures of human population structure show heterogeneity among genomic regions. *Genome Res* **15**: 1468–1476.

Weir BS, Cockerham CC. 1984. Estimating F-Statistics for the Analysis of Population Structure. *Evolution* **38**: 1358–1370.

Weir BS, Hill WG. 2002. Estimating F-statistics. *Annu Rev Genet* **36**: 721–750.

Wright S. 1949. THE GENETICAL STRUCTURE OF POPULATIONS. *Ann Hum Genet* **15**: 323–354.

Xu S, Yin X, Li S, Jin W, Lou H, Yang L, Gong X, Wang H, Shen Y, Pan X, et al. 2009. Genomic dissection of population substructure of Han Chinese and its implication in association studies. *Am J Hum Genet* **85**: 762–774.
