# Supplementary material for: Estimating and interpreting FST: The impact of rare variants
Source: HighWire-hosted journal article supplement (doi:10.1101/gr.154831.113), 2013-07-16
Supplement: Supplemental_TableS1.xlsx [file Supplemental_TableS1.xlsx]

## Sheet: Table S1 (All 1000G Pairs).txt
Population 1	Population 2	Estimator	Combination Method	Polymorphic in	Estimate	Std. Error	# of SNPs
ASW	CEU	WC	Average of Ratios	YRI	0.0556696	0.000141597	15028481
ASW	CEU	WC	Ratio of Averages	YRI	0.0914002	0.00036583	15028481
ASW	CEU	Hudson	Average of Ratios	YRI	0.0485654	0.000131681	15028481
ASW	CEU	Hudson	Ratio of Averages	YRI	0.0871179	0.000350392	15028481
ASW	CEU	Nei	Average of Ratios	YRI	0.0531992	0.000158153	15028481
ASW	CEU	Nei	Ratio of Averages	YRI	0.0914013	0.000384323	15028481
ASW	CEU	WH	Average of Ratios	YRI	0.135997	0.00019922	15028481
ASW	CEU	WH	Ratio of Averages	YRI	0.113002	0.000423175	15028481
ASW	CEU	Population-specific (ASW)	Average of Ratios	YRI	-0.48331	0.000679078	15028481
ASW	CEU	Population-specific (ASW)	Ratio of Averages	YRI	-0.0703419	0.000534596	15028481
ASW	CEU	Population-specific (CEU)	Average of Ratios	YRI	0.580441	0.000754559	15028481
ASW	CEU	Population-specific (CEU)	Ratio of Averages	YRI	0.244578	0.000909983	15028481
ASW	CEU	WC	Average of Ratios	ASW	0.048097	0.000117808	18307185
ASW	CEU	WC	Ratio of Averages	ASW	0.0899126	0.000349884	18307185
ASW	CEU	Hudson	Average of Ratios	ASW	0.0417141	0.00010958	18307185
ASW	CEU	Hudson	Ratio of Averages	ASW	0.0858888	0.000335842	18307185
ASW	CEU	Nei	Average of Ratios	ASW	0.0456423	0.000131478	18307185
ASW	CEU	Nei	Ratio of Averages	ASW	0.0900534	0.000367889	18307185
ASW	CEU	WH	Average of Ratios	ASW	0.131076	0.00017226	18307185
ASW	CEU	WH	Ratio of Averages	ASW	0.109583	0.00040731	18307185
ASW	CEU	Population-specific (ASW)	Average of Ratios	ASW	-0.501906	0.000631868	18307185
ASW	CEU	Population-specific (ASW)	Ratio of Averages	ASW	-0.0582489	0.000531363	18307185
ASW	CEU	Population-specific (CEU)	Average of Ratios	ASW	0.585334	0.000688844	18307185
ASW	CEU	Population-specific (CEU)	Ratio of Averages	ASW	0.230027	0.000888502	18307185
ASW	CEU	WC	Average of Ratios	CEU	0.0480658	0.000187741	10858788
ASW	CEU	WC	Ratio of Averages	CEU	0.0863624	0.000421811	10858788
ASW	CEU	Hudson	Average of Ratios	CEU	0.0461162	0.000178899	10858788
ASW	CEU	Hudson	Ratio of Averages	CEU	0.0846558	0.000416382	10858788
ASW	CEU	Nei	Average of Ratios	CEU	0.0511587	0.000217422	10858788
ASW	CEU	Nei	Ratio of Averages	CEU	0.0886962	0.000455483	10858788
ASW	CEU	WH	Average of Ratios	CEU	0.00973225	0.000256604	10858788
ASW	CEU	WH	Ratio of Averages	CEU	0.0855567	0.000482612	10858788
ASW	CEU	Population-specific (ASW)	Average of Ratios	CEU	0.267452	0.000765561	10858788
ASW	CEU	Population-specific (ASW)	Ratio of Averages	CEU	0.0791755	0.000533373	10858788
ASW	CEU	Population-specific (CEU)	Average of Ratios	CEU	-0.17522	0.000885009	10858788
ASW	CEU	Population-specific (CEU)	Ratio of Averages	CEU	0.0901362	0.00093555	10858788
ASW	CEU	WC	Average of Ratios	Both	0.0612931	0.000266519	8254567
ASW	CEU	WC	Ratio of Averages	Both	0.0875531	0.000460958	8254567
ASW	CEU	Hudson	Average of Ratios	Both	0.0583426	0.000253894	8254567
ASW	CEU	Hudson	Ratio of Averages	Both	0.0856021	0.000453647	8254567
ASW	CEU	Nei	Average of Ratios	Both	0.064927	0.000309492	8254567
ASW	CEU	Nei	Ratio of Averages	Both	0.0897326	0.000496742	8254567
ASW	CEU	WH	Average of Ratios	Both	0.0619591	0.000339592	8254567
ASW	CEU	WH	Ratio of Averages	Both	0.0889713	0.000527206	8254567
ASW	CEU	Population-specific (ASW)	Average of Ratios	Both	0.0363416	0.000739266	8254567
ASW	CEU	Population-specific (ASW)	Ratio of Averages	Both	0.0651061	0.00056218	8254567
ASW	CEU	Population-specific (CEU)	Average of Ratios	Both	0.0803435	0.00097049	8254567
ASW	CEU	Population-specific (CEU)	Ratio of Averages	Both	0.106098	0.00101922	8254567
ASW	CEU	WC	Average of Ratios	Either	0.0428717	0.000101113	20911406
ASW	CEU	WC	Ratio of Averages	Either	0.0888273	0.000333499	20911406
ASW	CEU	Hudson	Average of Ratios	Either	0.0374361	9.39921e-05	20911406
ASW	CEU	Hudson	Ratio of Averages	Either	0.0850683	0.000321091	20911406
ASW	CEU	Nei	Average of Ratios	Either	0.0408944	0.000112565	20911406
ASW	CEU	Nei	Ratio of Averages	Either	0.0891542	0.000351427	20911406
ASW	CEU	WH	Average of Ratios	Either	0.0953485	0.000153538	20911406
ASW	CEU	WH	Ratio of Averages	Either	0.106368	0.000387981	20911406
ASW	CEU	Population-specific (ASW)	Average of Ratios	Either	-0.314865	0.000559519	20911406
ASW	CEU	Population-specific (ASW)	Ratio of Averages	Either	-0.0445023	0.000502911	20911406
ASW	CEU	Population-specific (CEU)	Average of Ratios	Either	0.389737	0.000617394	20911406
ASW	CEU	Population-specific (CEU)	Ratio of Averages	Either	0.214639	0.000840364	20911406
ASW	CEU14	WC	Average of Ratios	YRI	0.0361237	0.000123326	14924632
ASW	CEU14	WC	Ratio of Averages	YRI	0.0807891	0.000338056	14924632
ASW	CEU14	Hudson	Average of Ratios	YRI	0.0485984	0.000150026	14924632
ASW	CEU14	Hudson	Ratio of Averages	YRI	0.0874821	0.000402637	14924632
ASW	CEU14	Nei	Average of Ratios	YRI	0.05413	0.000182287	14924632
ASW	CEU14	Nei	Ratio of Averages	YRI	0.092346	0.000443928	14924632
ASW	CEU14	WH	Average of Ratios	YRI	-0.306696	0.000425512	14924632
ASW	CEU14	WH	Ratio of Averages	YRI	-0.0116345	0.000378973	14924632
ASW	CEU14	Population-specific (ASW)	Average of Ratios	YRI	-0.518361	0.000686465	14924632
ASW	CEU14	Population-specific (ASW)	Ratio of Averages	YRI	-0.0706827	0.000566613	14924632
ASW	CEU14	Population-specific (CEU14)	Average of Ratios	YRI	0.615558	0.000788836	14924632
ASW	CEU14	Population-specific (CEU14)	Ratio of Averages	YRI	0.245647	0.00100635	14924632
ASW	CEU14	WC	Average of Ratios	ASW	0.030812	0.000103149	18307185
ASW	CEU14	WC	Ratio of Averages	ASW	0.0805627	0.000325514	18307185
ASW	CEU14	Hudson	Average of Ratios	ASW	0.0411622	0.000123806	18307185
ASW	CEU14	Hudson	Ratio of Averages	ASW	0.0862442	0.000385075	18307185
ASW	CEU14	Nei	Average of Ratios	ASW	0.0458232	0.000150289	18307185
ASW	CEU14	Nei	Ratio of Averages	ASW	0.09099	0.000424065	18307185
ASW	CEU14	WH	Average of Ratios	ASW	-0.326874	0.000398937	18307185
ASW	CEU14	WH	Ratio of Averages	ASW	-0.00446735	0.000376266	18307185
ASW	CEU14	Population-specific (ASW)	Average of Ratios	ASW	-0.54613	0.000642201	18307185
ASW	CEU14	Population-specific (ASW)	Ratio of Averages	ASW	-0.0585083	0.000568174	18307185
ASW	CEU14	Population-specific (CEU14)	Average of Ratios	ASW	0.628454	0.000718356	18307185
ASW	CEU14	Population-specific (CEU14)	Ratio of Averages	ASW	0.230997	0.000982907	18307185
ASW	CEU14	WC	Average of Ratios	CEU14	0.0689332	0.000269037	7454856
ASW	CEU14	WC	Ratio of Averages	CEU14	0.0871816	0.000482353	7454856
ASW	CEU14	Hudson	Average of Ratios	CEU14	0.0500538	0.000281127	7454856
ASW	CEU14	Hudson	Ratio of Averages	CEU14	0.0793534	0.000498632	7454856
ASW	CEU14	Nei	Average of Ratios	CEU14	0.0574144	0.000345659	7454856
ASW	CEU14	Nei	Ratio of Averages	CEU14	0.0835334	0.000546135	7454856
ASW	CEU14	WH	Average of Ratios	CEU14	0.151067	0.000501298	7454856
ASW	CEU14	WH	Ratio of Averages	CEU14	0.10271	0.000464482	7454856
ASW	CEU14	Population-specific (ASW)	Average of Ratios	CEU14	0.211245	0.000776026	7454856
ASW	CEU14	Population-specific (ASW)	Ratio of Averages	CEU14	0.116625	0.000602044	7454856
ASW	CEU14	Population-specific (CEU14)	Average of Ratios	CEU14	-0.111137	0.000941261	7454856
ASW	CEU14	Population-specific (CEU14)	Ratio of Averages	CEU14	0.0420823	0.00101279	7454856
ASW	CEU14	WC	Average of Ratios	Both	0.0658132	0.000301266	6706713
ASW	CEU14	WC	Ratio of Averages	Both	0.0869253	0.000495645	6706713
ASW	CEU14	Hudson	Average of Ratios	Both	0.0545287	0.000322087	6706713
ASW	CEU14	Hudson	Ratio of Averages	Both	0.0802605	0.000517935	6706713
ASW	CEU14	Nei	Average of Ratios	Both	0.0626504	0.000396142	6706713
ASW	CEU14	Nei	Ratio of Averages	Both	0.0845185	0.000567736	6706713
ASW	CEU14	WH	Average of Ratios	Both	0.0975991	0.000462752	6706713
ASW	CEU14	WH	Ratio of Averages	Both	0.0942486	0.000471659	6706713
ASW	CEU14	Population-specific (ASW)	Average of Ratios	Both	0.123258	0.000713779	6706713
ASW	CEU14	Population-specific (ASW)	Ratio of Averages	Both	0.102582	0.000608628	6706713
ASW	CEU14	Population-specific (CEU14)	Average of Ratios	Both	-0.0142008	0.000963247	6706713
ASW	CEU14	Population-specific (CEU14)	Ratio of Averages	Both	0.0579389	0.00105115	6706713
ASW	CEU14	WC	Average of Ratios	Either	0.0334068	9.83495e-05	19055328
ASW	CEU14	WC	Ratio of Averages	Either	0.0807834	0.000320541	19055328
ASW	CEU14	Hudson	Average of Ratios	Either	0.0399363	0.000118066	19055328
ASW	CEU14	Hudson	Ratio of Averages	Either	0.085425	0.000375863	19055328
ASW	CEU14	Nei	Average of Ratios	Either	0.0444354	0.000143192	19055328
ASW	CEU14	Nei	Ratio of Averages	Either	0.0900971	0.000413621	19055328
ASW	CEU14	WH	Average of Ratios	Either	-0.289291	0.000387001	19055328
ASW	CEU14	WH	Ratio of Averages	Either	0.00372411	0.000365857	19055328
ASW	CEU14	Population-specific (ASW)	Average of Ratios	Either	-0.485426	0.00062438	19055328
ASW	CEU14	Population-specific (ASW)	Ratio of Averages	Either	-0.0449488	0.000550298	19055328
ASW	CEU14	Population-specific (CEU14)	Average of Ratios	Either	0.565299	0.000700479	19055328
ASW	CEU14	Population-specific (CEU14)	Ratio of Averages	Either	0.215799	0.000953226	19055328
ASW	CHB	WC	Average of Ratios	YRI	0.0720454	0.000179355	15027116
ASW	CHB	WC	Ratio of Averages	YRI	0.126813	0.000507816	15027116
ASW	CHB	Hudson	Average of Ratios	YRI	0.061357	0.000163547	15027116
ASW	CHB	Hudson	Ratio of Averages	YRI	0.119677	0.000475247	15027116
ASW	CHB	Nei	Average of Ratios	YRI	0.0689906	0.000208359	15027116
ASW	CHB	Nei	Ratio of Averages	YRI	0.127712	0.000539362	15027116
ASW	CHB	WH	Average of Ratios	YRI	0.190716	0.000256874	15027116
ASW	CHB	WH	Ratio of Averages	YRI	0.160845	0.000581603	15027116
ASW	CHB	Population-specific (ASW)	Average of Ratios	YRI	-0.506384	0.000692265	15027116
ASW	CHB	Population-specific (ASW)	Ratio of Averages	YRI	-0.0610007	0.000624188	15027116
ASW	CHB	Population-specific (CHB)	Average of Ratios	YRI	0.629098	0.000769284	15027116
ASW	CHB	Population-specific (CHB)	Ratio of Averages	YRI	0.300356	0.00106414	15027116
ASW	CHB	WC	Average of Ratios	ASW	0.0622793	0.000150134	18307185
ASW	CHB	WC	Ratio of Averages	ASW	0.126242	0.00049301	18307185
ASW	CHB	Hudson	Average of Ratios	ASW	0.0526113	0.000137274	18307185
ASW	CHB	Hudson	Ratio of Averages	ASW	0.119249	0.000461898	18307185
ASW	CHB	Nei	Average of Ratios	ASW	0.0591495	0.00017467	18307185
ASW	CHB	Nei	Ratio of Averages	ASW	0.127226	0.000523972	18307185
ASW	CHB	WH	Average of Ratios	ASW	0.193849	0.00022028	18307185
ASW	CHB	WH	Ratio of Averages	ASW	0.159536	0.000566029	18307185
ASW	CHB	Population-specific (ASW)	Average of Ratios	ASW	-0.567265	0.000649222	18307185
ASW	CHB	Population-specific (ASW)	Ratio of Averages	ASW	-0.0575657	0.000628429	18307185
ASW	CHB	Population-specific (CHB)	Average of Ratios	ASW	0.672487	0.000695865	18307185
ASW	CHB	Population-specific (CHB)	Ratio of Averages	ASW	0.296065	0.00104535	18307185
ASW	CHB	WC	Average of Ratios	CHB	0.0662956	0.000263674	10162696
ASW	CHB	WC	Ratio of Averages	CHB	0.122597	0.000612529	10162696
ASW	CHB	Hudson	Average of Ratios	CHB	0.0643422	0.000247528	10162696
ASW	CHB	Hudson	Ratio of Averages	CHB	0.120915	0.000599655	10162696
ASW	CHB	Nei	Average of Ratios	CHB	0.0737827	0.000321122	10162696
ASW	CHB	Nei	Ratio of Averages	CHB	0.129099	0.000681336	10162696
ASW	CHB	WH	Average of Ratios	CHB	0.00592242	0.000379478	10162696
ASW	CHB	WH	Ratio of Averages	CHB	0.122523	0.000708676	10162696
ASW	CHB	Population-specific (ASW)	Average of Ratios	CHB	0.32074	0.000865854	10162696
ASW	CHB	Population-specific (ASW)	Ratio of Averages	CHB	0.113859	0.000646276	10162696
ASW	CHB	Population-specific (CHB)	Average of Ratios	CHB	-0.192056	0.00104195	10162696
ASW	CHB	Population-specific (CHB)	Ratio of Averages	CHB	0.127971	0.00118988	10162696
ASW	CHB	WC	Average of Ratios	Both	0.0909433	0.000416414	7062458
ASW	CHB	WC	Ratio of Averages	Both	0.124716	0.000686951	7062458
ASW	CHB	Hudson	Average of Ratios	Both	0.0867945	0.000390871	7062458
ASW	CHB	Hudson	Ratio of Averages	Both	0.122278	0.000668546	7062458
ASW	CHB	Nei	Average of Ratios	Both	0.100074	0.000508568	7062458
ASW	CHB	Nei	Ratio of Averages	Both	0.130652	0.000760726	7062458
ASW	CHB	WH	Average of Ratios	Both	0.10143	0.000538282	7062458
ASW	CHB	WH	Ratio of Averages	Both	0.129459	0.000788924	7062458
ASW	CHB	Population-specific (ASW)	Average of Ratios	Both	0.0225626	0.000861633	7062458
ASW	CHB	Population-specific (ASW)	Ratio of Averages	Both	0.0907619	0.000688132	7062458
ASW	CHB	Population-specific (CHB)	Average of Ratios	Both	0.151027	0.00122586	7062458
ASW	CHB	Population-specific (CHB)	Ratio of Averages	Both	0.153794	0.00131069	7062458
ASW	CHB	WC	Average of Ratios	Either	0.0547295	0.000125158	21407423
ASW	CHB	WC	Ratio of Averages	Either	0.124369	0.000460265	21407423
ASW	CHB	Hudson	Average of Ratios	Either	0.046903	0.000114235	21407423
ASW	CHB	Hudson	Ratio of Averages	Either	0.118175	0.000433729	21407423
ASW	CHB	Nei	Average of Ratios	Either	0.0525949	0.000144828	21407423
ASW	CHB	Nei	Ratio of Averages	Either	0.126006	0.000491448	21407423
ASW	CHB	WH	Average of Ratios	Either	0.135125	0.000196968	21407423
ASW	CHB	WH	Ratio of Averages	Either	0.153103	0.000531905	21407423
ASW	CHB	Population-specific (ASW)	Average of Ratios	Either	-0.340292	0.000566727	21407423
ASW	CHB	Population-specific (ASW)	Ratio of Averages	Either	-0.0351217	0.000592408	21407423
ASW	CHB	Population-specific (CHB)	Average of Ratios	Either	0.434098	0.000625207	21407423
ASW	CHB	Population-specific (CHB)	Ratio of Averages	Either	0.271472	0.000983996	21407423
ASW	CHB14	WC	Average of Ratios	YRI	0.0471345	0.000152131	14931080
ASW	CHB14	WC	Ratio of Averages	YRI	0.108086	0.000436479	14931080
ASW	CHB14	Hudson	Average of Ratios	YRI	0.0611554	0.000179755	14931080
ASW	CHB14	Hudson	Ratio of Averages	YRI	0.119689	0.000523925	14931080
ASW	CHB14	Nei	Average of Ratios	YRI	0.0697667	0.000230931	14931080
ASW	CHB14	Nei	Ratio of Averages	YRI	0.128458	0.000597219	14931080
ASW	CHB14	WH	Average of Ratios	YRI	-0.312654	0.000438057	14931080
ASW	CHB14	WH	Ratio of Averages	YRI	0.00626056	0.000474755	14931080
ASW	CHB14	Population-specific (ASW)	Average of Ratios	YRI	-0.535349	0.00069555	14931080
ASW	CHB14	Population-specific (ASW)	Ratio of Averages	YRI	-0.061314	0.000649004	14931080
ASW	CHB14	Population-specific (CHB14)	Average of Ratios	YRI	0.65766	0.000797033	14931080
ASW	CHB14	Population-specific (CHB14)	Ratio of Averages	YRI	0.300693	0.00115478	14931080
ASW	CHB14	WC	Average of Ratios	ASW	0.03945	0.000129085	18307185
ASW	CHB14	WC	Ratio of Averages	ASW	0.107988	0.000425119	18307185
ASW	CHB14	Hudson	Average of Ratios	ASW	0.0519728	0.000149438	18307185
ASW	CHB14	Hudson	Ratio of Averages	ASW	0.119226	0.000508699	18307185
ASW	CHB14	Nei	Average of Ratios	ASW	0.0592882	0.000191831	18307185
ASW	CHB14	Nei	Ratio of Averages	ASW	0.127934	0.000579603	18307185
ASW	CHB14	WH	Average of Ratios	ASW	-0.351384	0.000410351	18307185
ASW	CHB14	WH	Ratio of Averages	ASW	0.00824119	0.000473828	18307185
ASW	CHB14	Population-specific (ASW)	Average of Ratios	ASW	-0.591682	0.000649072	18307185
ASW	CHB14	Population-specific (ASW)	Ratio of Averages	ASW	-0.0578777	0.000652983	18307185
ASW	CHB14	Population-specific (CHB14)	Average of Ratios	ASW	0.695628	0.000715603	18307185
ASW	CHB14	Population-specific (CHB14)	Ratio of Averages	ASW	0.296331	0.00113224	18307185
ASW	CHB14	WC	Average of Ratios	CHB14	0.0983071	0.000372601	6795740
ASW	CHB14	WC	Ratio of Averages	CHB14	0.122138	0.000663727	6795740
ASW	CHB14	Hudson	Average of Ratios	CHB14	0.0737946	0.000384571	6795740
ASW	CHB14	Hudson	Ratio of Averages	CHB14	0.1135	0.0006877	6795740
ASW	CHB14	Nei	Average of Ratios	CHB14	0.0871498	0.000502685	6795740
ASW	CHB14	Nei	Ratio of Averages	CHB14	0.121619	0.000780364	6795740
ASW	CHB14	WH	Average of Ratios	CHB14	0.180811	0.00058692	6795740
ASW	CHB14	WH	Ratio of Averages	CHB14	0.138557	0.000607361	6795740
ASW	CHB14	Population-specific (ASW)	Average of Ratios	CHB14	0.244565	0.000887303	6795740
ASW	CHB14	Population-specific (ASW)	Ratio of Averages	CHB14	0.153485	0.000726738	6795740
ASW	CHB14	Population-specific (CHB14)	Average of Ratios	CHB14	-0.0969763	0.00111956	6795740
ASW	CHB14	Population-specific (CHB14)	Ratio of Averages	CHB14	0.0735152	0.00126608	6795740
ASW	CHB14	WC	Average of Ratios	Both	0.0943031	0.000440519	5831557
ASW	CHB14	WC	Ratio of Averages	Both	0.120949	0.000696816	5831557
ASW	CHB14	Hudson	Average of Ratios	Both	0.0820688	0.000468349	5831557
ASW	CHB14	Hudson	Ratio of Averages	Both	0.11476	0.000732729	5831557
ASW	CHB14	Nei	Average of Ratios	Both	0.0972574	0.000612827	5831557
ASW	CHB14	Nei	Ratio of Averages	Both	0.123028	0.000832398	5831557
ASW	CHB14	WH	Average of Ratios	Both	0.105628	0.000547256	5831557
ASW	CHB14	WH	Ratio of Averages	Both	0.124345	0.000630125	5831557
ASW	CHB14	Population-specific (ASW)	Average of Ratios	Both	0.119663	0.000803602	5831557
ASW	CHB14	Population-specific (ASW)	Ratio of Averages	Both	0.130055	0.00073454	5831557
ASW	CHB14	Population-specific (CHB14)	Average of Ratios	Both	0.0444748	0.00117995	5831557
ASW	CHB14	Population-specific (CHB14)	Ratio of Averages	Both	0.0994659	0.00132055	5831557
ASW	CHB14	WC	Average of Ratios	Either	0.0436063	0.000122596	19271368
ASW	CHB14	WC	Ratio of Averages	Either	0.108931	0.000417531	19271368
ASW	CHB14	Hudson	Average of Ratios	Either	0.0505608	0.000141207	19271368
ASW	CHB14	Hudson	Ratio of Averages	Either	0.118141	0.000493647	19271368
ASW	CHB14	Nei	Average of Ratios	Either	0.0576236	0.000181278	19271368
ASW	CHB14	Nei	Ratio of Averages	Either	0.12672	0.000561917	19271368
ASW	CHB14	WH	Average of Ratios	Either	-0.302007	0.000403707	19271368
ASW	CHB14	WH	Ratio of Averages	Either	0.0218703	0.000457878	19271368
ASW	CHB14	Population-specific (ASW)	Average of Ratios	Either	-0.512047	0.000642845	19271368
ASW	CHB14	Population-specific (ASW)	Ratio of Averages	Either	-0.0354827	0.000631221	19271368
ASW	CHB14	Population-specific (CHB14)	Average of Ratios	Either	0.613169	0.000714743	19271368
ASW	CHB14	Population-specific (CHB14)	Ratio of Averages	Either	0.271765	0.00109951	19271368
ASW	CHS	WC	Average of Ratios	YRI	0.0737031	0.000182349	15031164
ASW	CHS	WC	Ratio of Averages	YRI	0.129274	0.000514828	15031164
ASW	CHS	Hudson	Average of Ratios	YRI	0.0622066	0.000165066	15031164
ASW	CHS	Hudson	Ratio of Averages	YRI	0.121657	0.000479272	15031164
ASW	CHS	Nei	Average of Ratios	YRI	0.0700353	0.000210629	15031164
ASW	CHS	Nei	Ratio of Averages	YRI	0.129957	0.000545063	15031164
ASW	CHS	WH	Average of Ratios	YRI	0.200312	0.000262997	15031164
ASW	CHS	WH	Ratio of Averages	YRI	0.165739	0.000594432	15031164
ASW	CHS	Population-specific (ASW)	Average of Ratios	YRI	-0.507921	0.000684356	15031164
ASW	CHS	Population-specific (ASW)	Ratio of Averages	YRI	-0.0603213	0.000627866	15031164
ASW	CHS	Population-specific (CHS)	Average of Ratios	YRI	0.632334	0.000758245	15031164
ASW	CHS	Population-specific (CHS)	Ratio of Averages	YRI	0.303635	0.00107325	15031164
ASW	CHS	WC	Average of Ratios	ASW	0.0637558	0.000152758	18307185
ASW	CHS	WC	Ratio of Averages	ASW	0.128699	0.000499395	18307185
ASW	CHS	Hudson	Average of Ratios	ASW	0.0533633	0.000138661	18307185
ASW	CHS	Hudson	Ratio of Averages	ASW	0.121232	0.000465406	18307185
ASW	CHS	Nei	Average of Ratios	ASW	0.0600684	0.000176675	18307185
ASW	CHS	Nei	Ratio of Averages	ASW	0.129474	0.000529053	18307185
ASW	CHS	WH	Average of Ratios	ASW	0.204449	0.000226026	18307185
ASW	CHS	WH	Ratio of Averages	ASW	0.164415	0.000578358	18307185
ASW	CHS	Population-specific (ASW)	Average of Ratios	ASW	-0.570351	0.00064357	18307185
ASW	CHS	Population-specific (ASW)	Ratio of Averages	ASW	-0.0570392	0.000632847	18307185
ASW	CHS	Population-specific (CHS)	Average of Ratios	ASW	0.677077	0.000686958	18307185
ASW	CHS	Population-specific (CHS)	Ratio of Averages	ASW	0.299502	0.00105468	18307185
ASW	CHS	WC	Average of Ratios	CHS	0.0662714	0.000260612	10147887
ASW	CHS	WC	Ratio of Averages	CHS	0.123946	0.000612395	10147887
ASW	CHS	Hudson	Average of Ratios	CHS	0.0645121	0.000244045	10147887
ASW	CHS	Hudson	Ratio of Averages	CHS	0.122429	0.000599488	10147887
ASW	CHS	Nei	Average of Ratios	CHS	0.0740571	0.000317389	10147887
ASW	CHS	Nei	Ratio of Averages	CHS	0.130816	0.000682218	10147887
ASW	CHS	WH	Average of Ratios	CHS	-0.00262367	0.00038873	10147887
ASW	CHS	WH	Ratio of Averages	CHS	0.122957	0.000714434	10147887
ASW	CHS	Population-specific (ASW)	Average of Ratios	CHS	0.341662	0.000881311	10147887
ASW	CHS	Population-specific (ASW)	Ratio of Averages	CHS	0.120253	0.000654944	10147887
ASW	CHS	Population-specific (CHS)	Average of Ratios	CHS	-0.212638	0.00105144	10147887
ASW	CHS	Population-specific (CHS)	Ratio of Averages	CHS	0.124606	0.00118559	10147887
ASW	CHS	WC	Average of Ratios	Both	0.0926607	0.000421792	6907802
ASW	CHS	WC	Ratio of Averages	Both	0.126265	0.000692048	6907802
ASW	CHS	Hudson	Average of Ratios	Both	0.0885279	0.000394576	6907802
ASW	CHS	Hudson	Ratio of Averages	Both	0.123901	0.000672799	6907802
ASW	CHS	Nei	Average of Ratios	Both	0.102224	0.000514967	6907802
ASW	CHS	Nei	Ratio of Averages	Both	0.132495	0.000766861	6907802
ASW	CHS	WH	Average of Ratios	Both	0.10201	0.000550553	6907802
ASW	CHS	WH	Ratio of Averages	Both	0.130619	0.000801646	6907802
ASW	CHS	Population-specific (ASW)	Average of Ratios	Both	0.0328711	0.00085536	6907802
ASW	CHS	Population-specific (ASW)	Ratio of Averages	Both	0.09617	0.000690047	6907802
ASW	CHS	Population-specific (CHS)	Average of Ratios	Both	0.144185	0.00121935	6907802
ASW	CHS	Population-specific (CHS)	Ratio of Averages	Both	0.151632	0.00131517	6907802
ASW	CHS	WC	Average of Ratios	Either	0.055674	0.000127022	21547270
ASW	CHS	WC	Ratio of Averages	Either	0.126634	0.000465858	21547270
ASW	CHS	Hudson	Average of Ratios	Either	0.0473406	0.000115067	21547270
ASW	CHS	Hudson	Ratio of Averages	Either	0.12007	0.000436993	21547270
ASW	CHS	Nei	Average of Ratios	Either	0.0531419	0.000146109	21547270
ASW	CHS	Nei	Ratio of Averages	Either	0.128151	0.000496131	21547270
ASW	CHS	WH	Average of Ratios	Either	0.139767	0.000202743	21547270
ASW	CHS	WH	Ratio of Averages	Either	0.157312	0.000543219	21547270
ASW	CHS	Population-specific (ASW)	Average of Ratios	Either	-0.334216	0.000559243	21547270
ASW	CHS	Population-specific (ASW)	Ratio of Averages	Either	-0.0336749	0.00059446	21547270
ASW	CHS	Population-specific (CHS)	Average of Ratios	Either	0.428897	0.000617365	21547270
ASW	CHS	Population-specific (CHS)	Ratio of Averages	Either	0.273814	0.000991003	21547270
ASW	CLM	WC	Average of Ratios	YRI	0.0382628	0.000106429	15201584
ASW	CLM	WC	Ratio of Averages	YRI	0.0678084	0.00027619	15201584
ASW	CLM	Hudson	Average of Ratios	YRI	0.0364188	0.000106947	15201584
ASW	CLM	Hudson	Ratio of Averages	YRI	0.0659467	0.000277247	15201584
ASW	CLM	Nei	Average of Ratios	YRI	0.0392888	0.000123743	15201584
ASW	CLM	Nei	Ratio of Averages	YRI	0.0684684	0.00029762	15201584
ASW	CLM	WH	Average of Ratios	YRI	0.032874	0.000105405	15201584
ASW	CLM	WH	Ratio of Averages	YRI	0.0649146	0.000274874	15201584
ASW	CLM	Population-specific (ASW)	Average of Ratios	YRI	-0.392494	0.000647146	15201584
ASW	CLM	Population-specific (ASW)	Ratio of Averages	YRI	-0.0589474	0.000468691	15201584
ASW	CLM	Population-specific (CLM)	Average of Ratios	YRI	0.465331	0.000710973	15201584
ASW	CLM	Population-specific (CLM)	Ratio of Averages	YRI	0.190841	0.000736074	15201584
ASW	CLM	WC	Average of Ratios	ASW	0.0335307	8.92784e-05	18307185
ASW	CLM	WC	Ratio of Averages	ASW	0.0670614	0.000264054	18307185
ASW	CLM	Hudson	Average of Ratios	ASW	0.0316619	8.97026e-05	18307185
ASW	CLM	Hudson	Ratio of Averages	ASW	0.0651913	0.000265045	18307185
ASW	CLM	Nei	Average of Ratios	ASW	0.0341341	0.000103647	18307185
ASW	CLM	Nei	Ratio of Averages	ASW	0.0676577	0.0002843	18307185
ASW	CLM	WH	Average of Ratios	ASW	0.0277454	8.86097e-05	18307185
ASW	CLM	WH	Ratio of Averages	ASW	0.0642339	0.000262754	18307185
ASW	CLM	Population-specific (ASW)	Average of Ratios	ASW	-0.442239	0.000597351	18307185
ASW	CLM	Population-specific (ASW)	Ratio of Averages	ASW	-0.0506581	0.000468186	18307185
ASW	CLM	Population-specific (CLM)	Average of Ratios	ASW	0.505563	0.000640465	18307185
ASW	CLM	Population-specific (CLM)	Ratio of Averages	ASW	0.181041	0.000718819	18307185
ASW	CLM	WC	Average of Ratios	CLM	0.038272	0.000129423	13266798
ASW	CLM	WC	Ratio of Averages	CLM	0.0680126	0.000302902	13266798
ASW	CLM	Hudson	Average of Ratios	CLM	0.0362871	0.000129993	13266798
ASW	CLM	Hudson	Ratio of Averages	CLM	0.0660925	0.000303826	13266798
ASW	CLM	Nei	Average of Ratios	CLM	0.0394289	0.00015104	13266798
ASW	CLM	Nei	Ratio of Averages	CLM	0.0686251	0.000326202	13266798
ASW	CLM	WH	Average of Ratios	CLM	0.0371357	0.000128099	13266798
ASW	CLM	WH	Ratio of Averages	CLM	0.0657792	0.000301443	13266798
ASW	CLM	Population-specific (ASW)	Average of Ratios	CLM	0.138963	0.000652076	13266798
ASW	CLM	Population-specific (ASW)	Ratio of Averages	CLM	0.0281819	0.000467383	13266798
ASW	CLM	Population-specific (CLM)	Average of Ratios	CLM	-0.0663884	0.000742472	13266798
ASW	CLM	Population-specific (CLM)	Ratio of Averages	CLM	0.104003	0.00075664	13266798
ASW	CLM	WC	Average of Ratios	Both	0.0451326	0.000169262	10699868
ASW	CLM	WC	Ratio of Averages	Both	0.0687155	0.000325817	10699868
ASW	CLM	Hudson	Average of Ratios	Both	0.0432146	0.000170007	10699868
ASW	CLM	Hudson	Ratio of Averages	Both	0.0668085	0.00032686	10699868
ASW	CLM	Nei	Average of Ratios	Both	0.0470662	0.000197946	10699868
ASW	CLM	Nei	Ratio of Averages	Both	0.069394	0.000351191	10699868
ASW	CLM	WH	Average of Ratios	Both	0.0422988	0.000167669	10699868
ASW	CLM	WH	Ratio of Averages	Both	0.0663574	0.000324267	10699868
ASW	CLM	Population-specific (ASW)	Average of Ratios	Both	-0.0676027	0.000644454	10699868
ASW	CLM	Population-specific (ASW)	Ratio of Averages	Both	0.0122303	0.000494028	10699868
ASW	CLM	Population-specific (CLM)	Average of Ratios	Both	0.154032	0.000783839	10699868
ASW	CLM	Population-specific (CLM)	Ratio of Averages	Both	0.121387	0.000811415	10699868
ASW	CLM	WC	Average of Ratios	Either	0.0305971	7.6834e-05	20874115
ASW	CLM	WC	Ratio of Averages	Either	0.0664305	0.000253214	20874115
ASW	CLM	Hudson	Average of Ratios	Either	0.0286797	7.72035e-05	20874115
ASW	CLM	Hudson	Ratio of Averages	Either	0.0645475	0.000254125	20874115
ASW	CLM	Nei	Average of Ratios	Either	0.0308704	8.91156e-05	20874115
ASW	CLM	Nei	Ratio of Averages	Either	0.0669675	0.000272407	20874115
ASW	CLM	WH	Average of Ratios	Either	0.0262536	7.59968e-05	20874115
ASW	CLM	WH	Ratio of Averages	Either	0.0637263	0.000251964	20874115
ASW	CLM	Population-specific (ASW)	Average of Ratios	Either	-0.264884	0.000534389	20874115
ASW	CLM	Population-specific (ASW)	Ratio of Averages	Either	-0.0348256	0.000441133	20874115
ASW	CLM	Population-specific (CLM)	Average of Ratios	Either	0.322244	0.000579086	20874115
ASW	CLM	Population-specific (CLM)	Ratio of Averages	Either	0.163921	0.000680985	20874115
ASW	FIN	WC	Average of Ratios	YRI	0.0581889	0.000147326	15029738
ASW	FIN	WC	Ratio of Averages	YRI	0.0941484	0.000380285	15029738
ASW	FIN	Hudson	Average of Ratios	YRI	0.0494058	0.00013406	15029738
ASW	FIN	Hudson	Ratio of Averages	YRI	0.0891514	0.000359894	15029738
ASW	FIN	Nei	Average of Ratios	YRI	0.0542158	0.000161765	15029738
ASW	FIN	Nei	Ratio of Averages	YRI	0.0936245	0.00039555	15029738
ASW	FIN	WH	Average of Ratios	YRI	0.159811	0.000226184	15029738
ASW	FIN	WH	Ratio of Averages	YRI	0.121864	0.000454324	15029738
ASW	FIN	Population-specific (ASW)	Average of Ratios	YRI	-0.48192	0.000683552	15029738
ASW	FIN	Population-specific (ASW)	Ratio of Averages	YRI	-0.0682758	0.000537393	15029738
ASW	FIN	Population-specific (FIN)	Average of Ratios	YRI	0.580731	0.000759688	15029738
ASW	FIN	Population-specific (FIN)	Ratio of Averages	YRI	0.246579	0.000920165	15029738
ASW	FIN	WC	Average of Ratios	ASW	0.0502946	0.000122596	18307185
ASW	FIN	WC	Ratio of Averages	ASW	0.0926677	0.00036345	18307185
ASW	FIN	Hudson	Average of Ratios	ASW	0.0424596	0.000111603	18307185
ASW	FIN	Hudson	Ratio of Averages	ASW	0.0879935	0.000344905	18307185
ASW	FIN	Nei	Average of Ratios	ASW	0.0465438	0.000134476	18307185
ASW	FIN	Nei	Ratio of Averages	ASW	0.0923519	0.000378615	18307185
ASW	FIN	WH	Average of Ratios	ASW	0.156042	0.000197309	18307185
ASW	FIN	WH	Ratio of Averages	ASW	0.118043	0.000437272	18307185
ASW	FIN	Population-specific (ASW)	Average of Ratios	ASW	-0.504154	0.000636943	18307185
ASW	FIN	Population-specific (ASW)	Ratio of Averages	ASW	-0.0566193	0.00053284	18307185
ASW	FIN	Population-specific (FIN)	Average of Ratios	ASW	0.589074	0.000693811	18307185
ASW	FIN	Population-specific (FIN)	Ratio of Averages	ASW	0.232606	0.000896049	18307185
ASW	FIN	WC	Average of Ratios	FIN	0.0499375	0.000195679	10614356
ASW	FIN	WC	Ratio of Averages	FIN	0.0880102	0.000432662	10614356
ASW	FIN	Hudson	Average of Ratios	FIN	0.0480825	0.000184298	10614356
ASW	FIN	Hudson	Ratio of Averages	FIN	0.0864532	0.000426074	10614356
ASW	FIN	Nei	Average of Ratios	FIN	0.0533971	0.000225017	10614356
ASW	FIN	Nei	Ratio of Averages	FIN	0.0906529	0.000466907	10614356
ASW	FIN	WH	Average of Ratios	FIN	0.00271792	0.000283084	10614356
ASW	FIN	WH	Ratio of Averages	FIN	0.0864808	0.00051025	10614356
ASW	FIN	Population-specific (ASW)	Average of Ratios	FIN	0.2664	0.00074782	10614356
ASW	FIN	Population-specific (ASW)	Ratio of Averages	FIN	0.0863204	0.000528864	10614356
ASW	FIN	Population-specific (FIN)	Average of Ratios	FIN	-0.170235	0.000863965	10614356
ASW	FIN	Population-specific (FIN)	Ratio of Averages	FIN	0.0865861	0.000934884	10614356
ASW	FIN	WC	Average of Ratios	Both	0.0626363	0.000274202	8139025
ASW	FIN	WC	Ratio of Averages	Both	0.0893612	0.000470226	8139025
ASW	FIN	Hudson	Average of Ratios	Both	0.0594941	0.000258282	8139025
ASW	FIN	Hudson	Ratio of Averages	Both	0.0874502	0.000461166	8139025
ASW	FIN	Nei	Average of Ratios	Both	0.0663509	0.000315844	8139025
ASW	FIN	Nei	Ratio of Averages	Both	0.0917471	0.000505894	8139025
ASW	FIN	WH	Average of Ratios	Both	0.0628615	0.000365423	8139025
ASW	FIN	WH	Ratio of Averages	Both	0.0910132	0.000553527	8139025
ASW	FIN	Population-specific (ASW)	Average of Ratios	Both	0.0432887	0.000708775	8139025
ASW	FIN	Population-specific (ASW)	Ratio of Averages	Both	0.0703031	0.000561057	8139025
ASW	FIN	Population-specific (FIN)	Average of Ratios	Both	0.0756995	0.00094074	8139025
ASW	FIN	Population-specific (FIN)	Ratio of Averages	Both	0.104597	0.00101316	8139025
ASW	FIN	WC	Average of Ratios	Either	0.0452788	0.000105918	20782516
ASW	FIN	WC	Ratio of Averages	Either	0.0914152	0.000346469	20782516
ASW	FIN	Hudson	Average of Ratios	Either	0.0386602	9.63382e-05	20782516
ASW	FIN	Hudson	Ratio of Averages	Either	0.0871289	0.000330222	20782516
ASW	FIN	Nei	Average of Ratios	Either	0.042287	0.000115912	20782516
ASW	FIN	Nei	Ratio of Averages	Either	0.0914022	0.000362165	20782516
ASW	FIN	WH	Average of Ratios	Either	0.114226	0.000177051	20782516
ASW	FIN	WH	Ratio of Averages	Either	0.113749	0.000416631	20782516
ASW	FIN	Population-specific (ASW)	Average of Ratios	Either	-0.325	0.000567702	20782516
ASW	FIN	Population-specific (ASW)	Ratio of Averages	Either	-0.0409793	0.000503727	20782516
ASW	FIN	Population-specific (FIN)	Average of Ratios	Either	0.40232	0.000624844	20782516
ASW	FIN	Population-specific (FIN)	Ratio of Averages	Either	0.215237	0.000847491	20782516
ASW	GBR	WC	Average of Ratios	YRI	0.056373	0.000143687	15039712
ASW	GBR	WC	Ratio of Averages	YRI	0.0915774	0.000369078	15039712
ASW	GBR	Hudson	Average of Ratios	YRI	0.0484762	0.000132014	15039712
ASW	GBR	Hudson	Ratio of Averages	YRI	0.0869983	0.00035135	15039712
ASW	GBR	Nei	Average of Ratios	YRI	0.0531135	0.000158555	15039712
ASW	GBR	Nei	Ratio of Averages	YRI	0.0912652	0.000385309	15039712
ASW	GBR	WH	Average of Ratios	YRI	0.146854	0.000214712	15039712
ASW	GBR	WH	Ratio of Averages	YRI	0.11608	0.000436061	15039712
ASW	GBR	Population-specific (ASW)	Average of Ratios	YRI	-0.47855	0.000688922	15039712
ASW	GBR	Population-specific (ASW)	Ratio of Averages	YRI	-0.0687977	0.000532438	15039712
ASW	GBR	Population-specific (GBR)	Average of Ratios	YRI	0.575503	0.000767901	15039712
ASW	GBR	Population-specific (GBR)	Ratio of Averages	YRI	0.242794	0.000913993	15039712
ASW	GBR	WC	Average of Ratios	ASW	0.0487543	0.000119467	18307185
ASW	GBR	WC	Ratio of Averages	ASW	0.0900762	0.000352498	18307185
ASW	GBR	Hudson	Average of Ratios	ASW	0.0416859	0.000109813	18307185
ASW	GBR	Hudson	Ratio of Averages	ASW	0.0857915	0.000336402	18307185
ASW	GBR	Nei	Average of Ratios	ASW	0.0456209	0.000131764	18307185
ASW	GBR	Nei	Ratio of Averages	ASW	0.0899419	0.00036845	18307185
ASW	GBR	WH	Average of Ratios	ASW	0.142461	0.000186084	18307185
ASW	GBR	WH	Ratio of Averages	ASW	0.112381	0.000419534	18307185
ASW	GBR	Population-specific (ASW)	Average of Ratios	ASW	-0.498182	0.000639746	18307185
ASW	GBR	Population-specific (ASW)	Ratio of Averages	ASW	-0.056652	0.000530959	18307185
ASW	GBR	Population-specific (GBR)	Average of Ratios	ASW	0.581554	0.000698623	18307185
ASW	GBR	Population-specific (GBR)	Ratio of Averages	ASW	0.228235	0.000892311	18307185
ASW	GBR	WC	Average of Ratios	GBR	0.0472536	0.000185467	11019700
ASW	GBR	WC	Ratio of Averages	GBR	0.0859512	0.000419345	11019700
ASW	GBR	Hudson	Average of Ratios	GBR	0.0453337	0.000175271	11019700
ASW	GBR	Hudson	Ratio of Averages	GBR	0.0843108	0.000413262	11019700
ASW	GBR	Nei	Average of Ratios	GBR	0.0502821	0.00021301	11019700
ASW	GBR	Nei	Ratio of Averages	GBR	0.0883131	0.000451883	11019700
ASW	GBR	WH	Average of Ratios	GBR	0.00198815	0.000265802	11019700
ASW	GBR	WH	Ratio of Averages	GBR	0.0848573	0.000489705	11019700
ASW	GBR	Population-specific (ASW)	Average of Ratios	GBR	0.277542	0.000758016	11019700
ASW	GBR	Population-specific (ASW)	Ratio of Averages	GBR	0.0813828	0.000527722	11019700
ASW	GBR	Population-specific (GBR)	Average of Ratios	GBR	-0.186875	0.000874078	11019700
ASW	GBR	Population-specific (GBR)	Ratio of Averages	GBR	0.0872388	0.00093157	11019700
ASW	GBR	WC	Average of Ratios	Both	0.0608829	0.000267994	8290217
ASW	GBR	WC	Ratio of Averages	Both	0.0872049	0.000461847	8290217
ASW	GBR	Hudson	Average of Ratios	Both	0.0578149	0.000253514	8290217
ASW	GBR	Hudson	Ratio of Averages	Both	0.0852811	0.000453658	8290217
ASW	GBR	Nei	Average of Ratios	Both	0.0643424	0.000308758	8290217
ASW	GBR	Nei	Ratio of Averages	Both	0.0893755	0.00049656	8290217
ASW	GBR	WH	Average of Ratios	Both	0.0612003	0.000351885	8290217
ASW	GBR	WH	Ratio of Averages	Both	0.08871	0.000537855	8290217
ASW	GBR	Population-specific (ASW)	Average of Ratios	Both	0.0396789	0.000727689	8290217
ASW	GBR	Population-specific (ASW)	Ratio of Averages	Both	0.0669116	0.0005583	8290217
ASW	GBR	Population-specific (GBR)	Average of Ratios	Both	0.075951	0.000959613	8290217
ASW	GBR	Population-specific (GBR)	Ratio of Averages	Both	0.10365	0.00101594	8290217
ASW	GBR	WC	Average of Ratios	Either	0.0431885	0.000101359	21036668
ASW	GBR	WC	Ratio of Averages	Either	0.0889224	0.000334219	21036668
ASW	GBR	Hudson	Average of Ratios	Either	0.0372406	9.31276e-05	21036668
ASW	GBR	Hudson	Ratio of Averages	Either	0.0849474	0.000320094	21036668
ASW	GBR	Nei	Average of Ratios	Either	0.0406848	0.000111524	21036668
ASW	GBR	Nei	Ratio of Averages	Either	0.089017	0.000350275	21036668
ASW	GBR	WH	Average of Ratios	Either	0.1009	0.000163098	21036668
ASW	GBR	WH	Ratio of Averages	Either	0.10874	0.000397499	21036668
ASW	GBR	Population-specific (ASW)	Average of Ratios	Either	-0.303795	0.000555711	21036668
ASW	GBR	Population-specific (ASW)	Ratio of Averages	Either	-0.0425118	0.000498422	21036668
ASW	GBR	Population-specific (GBR)	Average of Ratios	Either	0.378276	0.0006134	21036668
ASW	GBR	Population-specific (GBR)	Ratio of Averages	Either	0.212407	0.000839056	21036668
ASW	IBS	WC	Average of Ratios	YRI	0.0353852	0.000118366	14938756
ASW	IBS	WC	Ratio of Averages	YRI	0.0783956	0.000319214	14938756
ASW	IBS	Hudson	Average of Ratios	YRI	0.0470225	0.000143432	14938756
ASW	IBS	Hudson	Ratio of Averages	YRI	0.084296	0.000378464	14938756
ASW	IBS	Nei	Average of Ratios	YRI	0.052274	0.00017289	14938756
ASW	IBS	Nei	Ratio of Averages	YRI	0.0888414	0.000415936	14938756
ASW	IBS	WH	Average of Ratios	YRI	-0.299233	0.00043321	14938756
ASW	IBS	WH	Ratio of Averages	YRI	-0.0101145	0.000368324	14938756
ASW	IBS	Population-specific (ASW)	Average of Ratios	YRI	-0.505512	0.00069985	14938756
ASW	IBS	Population-specific (ASW)	Ratio of Averages	YRI	-0.066359	0.000556258	14938756
ASW	IBS	Population-specific (IBS)	Average of Ratios	YRI	0.599557	0.000797848	14938756
ASW	IBS	Population-specific (IBS)	Ratio of Averages	YRI	0.234951	0.000965441	14938756
ASW	IBS	WC	Average of Ratios	ASW	0.0299616	9.91989e-05	18307185
ASW	IBS	WC	Ratio of Averages	ASW	0.0780773	0.000308086	18307185
ASW	IBS	Hudson	Average of Ratios	ASW	0.0398193	0.0001186	18307185
ASW	IBS	Hudson	Ratio of Averages	ASW	0.0831122	0.000363133	18307185
ASW	IBS	Nei	Average of Ratios	ASW	0.0442442	0.000142856	18307185
ASW	IBS	Nei	Ratio of Averages	ASW	0.0875478	0.000398635	18307185
ASW	IBS	WH	Average of Ratios	ASW	-0.322934	0.00040387	18307185
ASW	IBS	WH	Ratio of Averages	ASW	-0.00405515	0.000365307	18307185
ASW	IBS	Population-specific (ASW)	Average of Ratios	ASW	-0.539043	0.000650964	18307185
ASW	IBS	Population-specific (ASW)	Ratio of Averages	ASW	-0.0559847	0.000556191	18307185
ASW	IBS	Population-specific (IBS)	Average of Ratios	ASW	0.618681	0.000724572	18307185
ASW	IBS	Population-specific (IBS)	Ratio of Averages	ASW	0.222209	0.000944269	18307185
ASW	IBS	WC	Average of Ratios	IBS	0.0670878	0.000251803	7709984
ASW	IBS	WC	Ratio of Averages	IBS	0.0846615	0.00044965	7709984
ASW	IBS	Hudson	Average of Ratios	IBS	0.0480065	0.000262326	7709984
ASW	IBS	Hudson	Ratio of Averages	IBS	0.0769227	0.000465174	7709984
ASW	IBS	Nei	Average of Ratios	IBS	0.0549378	0.00032001	7709984
ASW	IBS	Nei	Ratio of Averages	IBS	0.0808731	0.000508215	7709984
ASW	IBS	WH	Average of Ratios	IBS	0.149816	0.000487284	7709984
ASW	IBS	WH	Ratio of Averages	IBS	0.0998622	0.000443979	7709984
ASW	IBS	Population-specific (ASW)	Average of Ratios	IBS	0.210468	0.000758839	7709984
ASW	IBS	Population-specific (ASW)	Ratio of Averages	IBS	0.113528	0.000587182	7709984
ASW	IBS	Population-specific (IBS)	Average of Ratios	IBS	-0.114455	0.000914558	7709984
ASW	IBS	Population-specific (IBS)	Ratio of Averages	IBS	0.0403172	0.000969821	7709984
ASW	IBS	WC	Average of Ratios	Both	0.0634939	0.000284302	6895850
ASW	IBS	WC	Ratio of Averages	Both	0.0843492	0.000464832	6895850
ASW	IBS	Hudson	Average of Ratios	Both	0.0524623	0.00030298	6895850
ASW	IBS	Hudson	Ratio of Averages	Both	0.0778429	0.000485759	6895850
ASW	IBS	Nei	Average of Ratios	Both	0.0601448	0.000369663	6895850
ASW	IBS	Nei	Ratio of Averages	Both	0.0818697	0.00053114	6895850
ASW	IBS	WH	Average of Ratios	Both	0.0930654	0.000454233	6895850
ASW	IBS	WH	Ratio of Averages	Both	0.090656	0.000455204	6895850
ASW	IBS	Population-specific (ASW)	Average of Ratios	Both	0.117254	0.000704906	6895850
ASW	IBS	Population-specific (ASW)	Ratio of Averages	Both	0.0982893	0.000596726	6895850
ASW	IBS	Population-specific (IBS)	Average of Ratios	Both	-0.0123297	0.000936895	6895850
ASW	IBS	Population-specific (IBS)	Ratio of Averages	Both	0.0573965	0.00100256	6895850
ASW	IBS	WC	Average of Ratios	Either	0.0328385	9.48684e-05	19121319
ASW	IBS	WC	Ratio of Averages	Either	0.0783456	0.000305223	19121319
ASW	IBS	Hudson	Average of Ratios	Either	0.038561	0.000113407	19121319
ASW	IBS	Hudson	Ratio of Averages	Either	0.082277	0.000356301	19121319
ASW	IBS	Nei	Average of Ratios	Either	0.0428216	0.000136546	19121319
ASW	IBS	Nei	Ratio of Averages	Either	0.0866405	0.00039085	19121319
ASW	IBS	WH	Average of Ratios	Either	-0.28234	0.000389544	19121319
ASW	IBS	WH	Ratio of Averages	Either	0.00488857	0.00035519	19121319
ASW	IBS	Population-specific (ASW)	Average of Ratios	Either	-0.473514	0.00062957	19121319
ASW	IBS	Population-specific (ASW)	Ratio of Averages	Either	-0.0412152	0.000538071	19121319
ASW	IBS	Population-specific (IBS)	Average of Ratios	Either	0.550636	0.000704662	19121319
ASW	IBS	Population-specific (IBS)	Ratio of Averages	Either	0.205769	0.00091763	19121319
ASW	JPT	WC	Average of Ratios	YRI	0.0710041	0.000176316	15017718
ASW	JPT	WC	Ratio of Averages	YRI	0.12723	0.000499628	15017718
ASW	JPT	Hudson	Average of Ratios	YRI	0.0620876	0.000163706	15017718
ASW	JPT	Hudson	Ratio of Averages	YRI	0.121026	0.000473216	15017718
ASW	JPT	Nei	Average of Ratios	YRI	0.0698836	0.000208752	15017718
ASW	JPT	Nei	Ratio of Averages	YRI	0.129255	0.000537862	15017718
ASW	JPT	WH	Average of Ratios	YRI	0.168813	0.000233054	15017718
ASW	JPT	WH	Ratio of Averages	YRI	0.15485	0.000559096	15017718
ASW	JPT	Population-specific (ASW)	Average of Ratios	YRI	-0.509657	0.000688958	15017718
ASW	JPT	Population-specific (ASW)	Ratio of Averages	YRI	-0.0601762	0.000625178	15017718
ASW	JPT	Population-specific (JPT)	Average of Ratios	YRI	0.633832	0.000763012	15017718
ASW	JPT	Population-specific (JPT)	Ratio of Averages	YRI	0.302228	0.00106714	15017718
ASW	JPT	WC	Average of Ratios	ASW	0.0613377	0.000147847	18307185
ASW	JPT	WC	Ratio of Averages	ASW	0.126703	0.000485743	18307185
ASW	JPT	Hudson	Average of Ratios	ASW	0.0532268	0.000137652	18307185
ASW	JPT	Hudson	Ratio of Averages	ASW	0.12061	0.000460509	18307185
ASW	JPT	Nei	Average of Ratios	ASW	0.0598981	0.000175257	18307185
ASW	JPT	Nei	Ratio of Averages	ASW	0.128782	0.000523187	18307185
ASW	JPT	WH	Average of Ratios	ASW	0.169835	0.000198086	18307185
ASW	JPT	WH	Ratio of Averages	ASW	0.153751	0.000544171	18307185
ASW	JPT	Population-specific (ASW)	Average of Ratios	ASW	-0.571462	0.000646539	18307185
ASW	JPT	Population-specific (ASW)	Ratio of Averages	ASW	-0.0569305	0.00062952	18307185
ASW	JPT	Population-specific (JPT)	Average of Ratios	ASW	0.677916	0.000689682	18307185
ASW	JPT	Population-specific (JPT)	Ratio of Averages	ASW	0.298151	0.00104749	18307185
ASW	JPT	WC	Average of Ratios	JPT	0.0666295	0.000259113	9807096
ASW	JPT	WC	Ratio of Averages	JPT	0.122359	0.000604358	9807096
ASW	JPT	Hudson	Average of Ratios	JPT	0.0652742	0.000247738	9807096
ASW	JPT	Hudson	Ratio of Averages	JPT	0.120959	0.000596011	9807096
ASW	JPT	Nei	Average of Ratios	JPT	0.0748936	0.00032218	9807096
ASW	JPT	Nei	Ratio of Averages	JPT	0.129163	0.000677281	9807096
ASW	JPT	WH	Average of Ratios	JPT	0.0131904	0.000344228	9807096
ASW	JPT	WH	Ratio of Averages	JPT	0.120044	0.000679116	9807096
ASW	JPT	Population-specific (ASW)	Average of Ratios	JPT	0.344295	0.000879961	9807096
ASW	JPT	Population-specific (ASW)	Ratio of Averages	JPT	0.125861	0.000656637	9807096
ASW	JPT	Population-specific (JPT)	Average of Ratios	JPT	-0.213746	0.00103235	9807096
ASW	JPT	Population-specific (JPT)	Ratio of Averages	JPT	0.116058	0.00116793	9807096
ASW	JPT	WC	Average of Ratios	Both	0.0912199	0.000413863	6758989
ASW	JPT	WC	Ratio of Averages	Both	0.124561	0.000676515	6758989
ASW	JPT	Hudson	Average of Ratios	Both	0.0881017	0.000395339	6758989
ASW	JPT	Hudson	Ratio of Averages	Both	0.122491	0.000663561	6758989
ASW	JPT	Nei	Average of Ratios	Both	0.101719	0.000515069	6758989
ASW	JPT	Nei	Ratio of Averages	Both	0.130908	0.000755283	6758989
ASW	JPT	WH	Average of Ratios	Both	0.095477	0.000504781	6758989
ASW	JPT	WH	Ratio of Averages	Both	0.126544	0.000756297	6758989
ASW	JPT	Population-specific (ASW)	Average of Ratios	Both	0.0485911	0.000870719	6758989
ASW	JPT	Population-specific (ASW)	Ratio of Averages	Both	0.10078	0.000699387	6758989
ASW	JPT	Population-specific (JPT)	Average of Ratios	Both	0.127612	0.00120758	6758989
ASW	JPT	Population-specific (JPT)	Ratio of Averages	Both	0.144203	0.00128943	6758989
ASW	JPT	WC	Average of Ratios	Either	0.0543101	0.000123627	21355292
ASW	JPT	WC	Ratio of Averages	Either	0.124775	0.000454381	21355292
ASW	JPT	Hudson	Average of Ratios	Either	0.0477215	0.000115002	21355292
ASW	JPT	Hudson	Ratio of Averages	Either	0.119391	0.000433066	21355292
ASW	JPT	Nei	Average of Ratios	Either	0.0535482	0.000146007	21355292
ASW	JPT	Nei	Ratio of Averages	Either	0.127395	0.000491364	21355292
ASW	JPT	WH	Average of Ratios	Either	0.121433	0.000175272	21355292
ASW	JPT	WH	Ratio of Averages	Either	0.147768	0.000511397	21355292
ASW	JPT	Population-specific (ASW)	Average of Ratios	Either	-0.347162	0.000558232	21355292
ASW	JPT	Population-specific (ASW)	Ratio of Averages	Either	-0.0326318	0.000593045	21355292
ASW	JPT	Population-specific (JPT)	Average of Ratios	Either	0.442605	0.000612948	21355292
ASW	JPT	Population-specific (JPT)	Ratio of Averages	Either	0.271413	0.000983881	21355292
ASW	LWK	WC	Average of Ratios	YRI	0.00879541	3.04629e-05	16422709
ASW	LWK	WC	Ratio of Averages	YRI	0.0120165	6.10314e-05	16422709
ASW	LWK	Hudson	Average of Ratios	YRI	0.00703389	3.01207e-05	16422709
ASW	LWK	Hudson	Ratio of Averages	YRI	0.0103847	6.12668e-05	16422709
ASW	LWK	Nei	Average of Ratios	YRI	0.0072626	3.14345e-05	16422709
ASW	LWK	Nei	Ratio of Averages	YRI	0.0104736	6.21128e-05	16422709
ASW	LWK	WH	Average of Ratios	YRI	0.00218725	9.94703e-05	16422709
ASW	LWK	WH	Ratio of Averages	YRI	0.00914982	7.5584e-05	16422709
ASW	LWK	Population-specific (ASW)	Average of Ratios	YRI	0.0283052	0.000431789	16422709
ASW	LWK	Population-specific (ASW)	Ratio of Averages	YRI	0.0158042	0.000221813	16422709
ASW	LWK	Population-specific (LWK)	Average of Ratios	YRI	-0.0142375	0.000426417	16422709
ASW	LWK	Population-specific (LWK)	Ratio of Averages	YRI	0.00496512	0.00021527	16422709
ASW	LWK	WC	Average of Ratios	ASW	0.00875337	2.83917e-05	18307185
ASW	LWK	WC	Ratio of Averages	ASW	0.0119954	6.05943e-05	18307185
ASW	LWK	Hudson	Average of Ratios	ASW	0.0059449	2.74385e-05	18307185
ASW	LWK	Hudson	Ratio of Averages	ASW	0.0102529	6.05232e-05	18307185
ASW	LWK	Nei	Average of Ratios	ASW	0.00614967	2.86362e-05	18307185
ASW	LWK	Nei	Ratio of Averages	ASW	0.0103402	6.13518e-05	18307185
ASW	LWK	WH	Average of Ratios	ASW	0.0499633	9.80909e-05	18307185
ASW	LWK	WH	Ratio of Averages	ASW	0.0136901	7.6116e-05	18307185
ASW	LWK	Population-specific (ASW)	Average of Ratios	ASW	-0.187247	0.000416875	18307185
ASW	LWK	Population-specific (ASW)	Ratio of Averages	ASW	-0.00483239	0.000222507	18307185
ASW	LWK	Population-specific (LWK)	Average of Ratios	ASW	0.199137	0.000415896	18307185
ASW	LWK	Population-specific (LWK)	Ratio of Averages	ASW	0.0253383	0.000218462	18307185
ASW	LWK	WC	Average of Ratios	LWK	0.00729566	2.54661e-05	19631988
ASW	LWK	WC	Ratio of Averages	LWK	0.0118836	5.88733e-05	19631988
ASW	LWK	Hudson	Average of Ratios	LWK	0.00642504	2.5253e-05	19631988
ASW	LWK	Hudson	Ratio of Averages	LWK	0.0103426	5.93222e-05	19631988
ASW	LWK	Nei	Average of Ratios	LWK	0.00662601	2.63501e-05	19631988
ASW	LWK	Nei	Ratio of Averages	LWK	0.0104309	6.01381e-05	19631988
ASW	LWK	WH	Average of Ratios	LWK	-0.0468356	9.90103e-05	19631988
ASW	LWK	WH	Ratio of Averages	LWK	0.00522965	7.43044e-05	19631988
ASW	LWK	Population-specific (ASW)	Average of Ratios	LWK	0.24018	0.000428414	19631988
ASW	LWK	Population-specific (ASW)	Ratio of Averages	LWK	0.032783	0.000220843	19631988
ASW	LWK	Population-specific (LWK)	Average of Ratios	LWK	-0.22733	0.000425653	19631988
ASW	LWK	Population-specific (LWK)	Ratio of Averages	LWK	-0.0120977	0.000215149	19631988
ASW	LWK	WC	Average of Ratios	Both	0.0079499	3.50766e-05	14880205
ASW	LWK	WC	Ratio of Averages	Both	0.0118559	6.42141e-05	14880205
ASW	LWK	Hudson	Average of Ratios	Both	0.00611814	3.44483e-05	14880205
ASW	LWK	Hudson	Ratio of Averages	Both	0.0102017	6.43878e-05	14880205
ASW	LWK	Nei	Average of Ratios	Both	0.00634912	3.59713e-05	14880205
ASW	LWK	Nei	Ratio of Averages	Both	0.0102881	6.52652e-05	14880205
ASW	LWK	WH	Average of Ratios	Both	0.00807217	7.99228e-05	14880205
ASW	LWK	WH	Ratio of Averages	Both	0.009896	7.88973e-05	14880205
ASW	LWK	Population-specific (ASW)	Average of Ratios	Both	-0.00245788	0.000327531	14880205
ASW	LWK	Population-specific (ASW)	Ratio of Averages	Both	0.0115433	0.000225322	14880205
ASW	LWK	Population-specific (LWK)	Average of Ratios	Both	0.0146942	0.000324167	14880205
ASW	LWK	Population-specific (LWK)	Ratio of Averages	Both	0.00886007	0.000219838	14880205
ASW	LWK	WC	Average of Ratios	Either	0.00803079	2.17362e-05	23058968
ASW	LWK	WC	Ratio of Averages	Either	0.0120192	5.60026e-05	23058968
ASW	LWK	Hudson	Average of Ratios	Either	0.00624188	2.12127e-05	23058968
ASW	LWK	Hudson	Ratio of Averages	Either	0.0103905	5.62134e-05	23058968
ASW	LWK	Nei	Average of Ratios	Either	0.00642651	2.21241e-05	23058968
ASW	LWK	Nei	Ratio of Averages	Either	0.0104795	5.699e-05	23058968
ASW	LWK	WH	Average of Ratios	Either	-0.00541672	9.27594e-05	23058968
ASW	LWK	WH	Ratio of Averages	Either	0.00901949	7.12204e-05	23058968
ASW	LWK	Population-specific (ASW)	Average of Ratios	Either	0.0574102	0.000400741	23058968
ASW	LWK	Population-specific (ASW)	Ratio of Averages	Either	0.0164078	0.000212544	23058968
ASW	LWK	Population-specific (LWK)	Average of Ratios	Either	-0.0449264	0.000399316	23058968
ASW	LWK	Population-specific (LWK)	Ratio of Averages	Either	0.00437322	0.000207974	23058968
ASW	MXL	WC	Average of Ratios	YRI	0.0470477	0.000123956	15126260
ASW	MXL	WC	Ratio of Averages	YRI	0.0846987	0.000329826	15126260
ASW	MXL	Hudson	Average of Ratios	YRI	0.0441799	0.000122474	15126260
ASW	MXL	Hudson	Ratio of Averages	YRI	0.0823188	0.000327384	15126260
ASW	MXL	Nei	Average of Ratios	YRI	0.0482433	0.000145343	15126260
ASW	MXL	Nei	Ratio of Averages	YRI	0.0861797	0.000357394	15126260
ASW	MXL	WH	Average of Ratios	YRI	0.0630512	0.000132612	15126260
ASW	MXL	WH	Ratio of Averages	YRI	0.0880045	0.000340536	15126260
ASW	MXL	Population-specific (ASW)	Average of Ratios	YRI	-0.43515	0.000669967	15126260
ASW	MXL	Population-specific (ASW)	Ratio of Averages	YRI	-0.0620979	0.000517355	15126260
ASW	MXL	Population-specific (MXL)	Average of Ratios	YRI	0.523509	0.000736472	15126260
ASW	MXL	Population-specific (MXL)	Ratio of Averages	YRI	0.226735	0.000827555	15126260
ASW	MXL	WC	Average of Ratios	ASW	0.0410743	0.000103984	18307185
ASW	MXL	WC	Ratio of Averages	ASW	0.0840094	0.000315799	18307185
ASW	MXL	Hudson	Average of Ratios	ASW	0.0383078	0.000102799	18307185
ASW	MXL	Hudson	Ratio of Averages	ASW	0.0816731	0.000313595	18307185
ASW	MXL	Nei	Average of Ratios	ASW	0.0418209	0.00012178	18307185
ASW	MXL	Nei	Ratio of Averages	ASW	0.0854749	0.000342111	18307185
ASW	MXL	WH	Average of Ratios	ASW	0.0585799	0.000111077	18307185
ASW	MXL	WH	Ratio of Averages	ASW	0.0869375	0.000326294	18307185
ASW	MXL	Population-specific (ASW)	Average of Ratios	ASW	-0.476602	0.000621792	18307185
ASW	MXL	Population-specific (ASW)	Ratio of Averages	ASW	-0.0520419	0.000516589	18307185
ASW	MXL	Population-specific (MXL)	Average of Ratios	ASW	0.553217	0.000666834	18307185
ASW	MXL	Population-specific (MXL)	Ratio of Averages	ASW	0.215388	0.000807017	18307185
ASW	MXL	WC	Average of Ratios	MXL	0.0474907	0.000160073	12338622
ASW	MXL	WC	Ratio of Averages	MXL	0.0853511	0.000370332	12338622
ASW	MXL	Hudson	Average of Ratios	MXL	0.0454332	0.000158629	12338622
ASW	MXL	Hudson	Ratio of Averages	MXL	0.0833764	0.000369264	12338622
ASW	MXL	Nei	Average of Ratios	MXL	0.0501525	0.000189484	12338622
ASW	MXL	Nei	Ratio of Averages	MXL	0.0873334	0.000403549	12338622
ASW	MXL	WH	Average of Ratios	MXL	0.0409641	0.00017079	12338622
ASW	MXL	WH	Ratio of Averages	MXL	0.0849335	0.000382253	12338622
ASW	MXL	Population-specific (ASW)	Average of Ratios	MXL	0.15895	0.000733349	12338622
ASW	MXL	Population-specific (ASW)	Ratio of Averages	MXL	0.0438267	0.000527173	12338622
ASW	MXL	Population-specific (MXL)	Average of Ratios	MXL	-0.0680831	0.000833528	12338622
ASW	MXL	Population-specific (MXL)	Ratio of Averages	MXL	0.122926	0.000862702	12338622
ASW	MXL	WC	Average of Ratios	Both	0.0573062	0.000213647	9818375
ASW	MXL	WC	Ratio of Averages	Both	0.0862165	0.000398863	9818375
ASW	MXL	Hudson	Average of Ratios	Both	0.0549997	0.000211711	9818375
ASW	MXL	Hudson	Ratio of Averages	Both	0.0841773	0.000397423	9818375
ASW	MXL	Nei	Average of Ratios	Both	0.0608561	0.000253325	9818375
ASW	MXL	Nei	Ratio of Averages	Both	0.0882092	0.000434685	9818375
ASW	MXL	WH	Average of Ratios	Both	0.0594067	0.000225587	9818375
ASW	MXL	WH	Ratio of Averages	Both	0.0863862	0.000411591	9818375
ASW	MXL	Population-specific (ASW)	Average of Ratios	Both	-0.056937	0.000718812	9818375
ASW	MXL	Population-specific (ASW)	Ratio of Averages	Both	0.0280725	0.000557261	9818375
ASW	MXL	Population-specific (MXL)	Average of Ratios	Both	0.166936	0.000881781	9818375
ASW	MXL	Population-specific (MXL)	Ratio of Averages	Both	0.140282	0.000926929	9818375
ASW	MXL	WC	Average of Ratios	Either	0.0372236	8.98861e-05	20827432
ASW	MXL	WC	Ratio of Averages	Either	0.0832502	0.00030296	20827432
ASW	MXL	Hudson	Average of Ratios	Either	0.0346602	8.88472e-05	20827432
ASW	MXL	Hudson	Ratio of Averages	Either	0.0809782	0.000301068	20827432
ASW	MXL	Nei	Average of Ratios	Either	0.0377832	0.000105149	20827432
ASW	MXL	Nei	Ratio of Averages	Either	0.0847169	0.000328208	20827432
ASW	MXL	WH	Average of Ratios	Either	0.0477541	9.74491e-05	20827432
ASW	MXL	WH	Ratio of Averages	Either	0.0856017	0.000313024	20827432
ASW	MXL	Population-specific (ASW)	Average of Ratios	Either	-0.297924	0.000554935	20827432
ASW	MXL	Population-specific (ASW)	Ratio of Averages	Either	-0.0364568	0.000487951	20827432
ASW	MXL	Population-specific (MXL)	Average of Ratios	Either	0.367244	0.000602946	20827432
ASW	MXL	Population-specific (MXL)	Ratio of Averages	Either	0.198413	0.000765369	20827432
ASW	PUR	WC	Average of Ratios	YRI	0.0330855	9.63752e-05	15238996
ASW	PUR	WC	Ratio of Averages	YRI	0.0593049	0.000247484	15238996
ASW	PUR	Hudson	Average of Ratios	YRI	0.0318363	9.81292e-05	15238996
ASW	PUR	Hudson	Ratio of Averages	YRI	0.0576866	0.000250486	15238996
ASW	PUR	Nei	Average of Ratios	YRI	0.0341391	0.000111984	15238996
ASW	PUR	Nei	Ratio of Averages	YRI	0.0596485	0.000266659	15238996
ASW	PUR	WH	Average of Ratios	YRI	0.0113368	9.29088e-05	15238996
ASW	PUR	WH	Ratio of Averages	YRI	0.051801	0.000237818	15238996
ASW	PUR	Population-specific (ASW)	Average of Ratios	YRI	-0.364488	0.000631599	15238996
ASW	PUR	Population-specific (ASW)	Ratio of Averages	YRI	-0.0561012	0.000437201	15238996
ASW	PUR	Population-specific (PUR)	Average of Ratios	YRI	0.428161	0.000694299	15238996
ASW	PUR	Population-specific (PUR)	Ratio of Averages	YRI	0.171474	0.000676299	15238996
ASW	PUR	WC	Average of Ratios	ASW	0.0289902	8.12679e-05	18307185
ASW	PUR	WC	Ratio of Averages	ASW	0.0586665	0.000237746	18307185
ASW	PUR	Hudson	Average of Ratios	ASW	0.0276771	8.26972e-05	18307185
ASW	PUR	Hudson	Ratio of Averages	ASW	0.0570164	0.000240551	18307185
ASW	PUR	Nei	Average of Ratios	ASW	0.0296631	9.42631e-05	18307185
ASW	PUR	Nei	Ratio of Averages	ASW	0.0589354	0.000255907	18307185
ASW	PUR	WH	Average of Ratios	ASW	0.00439214	8.02313e-05	18307185
ASW	PUR	WH	Ratio of Averages	ASW	0.0514932	0.000228259	18307185
ASW	PUR	Population-specific (ASW)	Average of Ratios	ASW	-0.422499	0.000583328	18307185
ASW	PUR	Population-specific (ASW)	Ratio of Averages	ASW	-0.0497662	0.000437683	18307185
ASW	PUR	Population-specific (PUR)	Average of Ratios	ASW	0.477853	0.00062692	18307185
ASW	PUR	Population-specific (PUR)	Ratio of Averages	ASW	0.163799	0.000664174	18307185
ASW	PUR	WC	Average of Ratios	PUR	0.0336623	0.000116218	13501139
ASW	PUR	WC	Ratio of Averages	PUR	0.0595995	0.000269472	13501139
ASW	PUR	Hudson	Average of Ratios	PUR	0.0316271	0.000117987	13501139
ASW	PUR	Hudson	Ratio of Averages	PUR	0.0576873	0.000271587	13501139
ASW	PUR	Nei	Average of Ratios	PUR	0.034128	0.000135052	13501139
ASW	PUR	Nei	Ratio of Averages	PUR	0.0596502	0.000289128	13501139
ASW	PUR	WH	Average of Ratios	PUR	0.0363331	0.000110566	13501139
ASW	PUR	WH	Ratio of Averages	PUR	0.0557828	0.000258861	13501139
ASW	PUR	Population-specific (ASW)	Average of Ratios	PUR	0.12261	0.000617527	13501139
ASW	PUR	Population-specific (ASW)	Ratio of Averages	PUR	0.0208668	0.000435688	13501139
ASW	PUR	Population-specific (PUR)	Average of Ratios	PUR	-0.0593559	0.000700411	13501139
ASW	PUR	Population-specific (PUR)	Ratio of Averages	PUR	0.0945078	0.000691182	13501139
ASW	PUR	WC	Average of Ratios	Both	0.0385505	0.000148572	11111616
ASW	PUR	WC	Ratio of Averages	Both	0.0601406	0.000287974	11111616
ASW	PUR	Hudson	Average of Ratios	Both	0.0368279	0.000150856	11111616
ASW	PUR	Hudson	Ratio of Averages	Both	0.0582932	0.000290506	11111616
ASW	PUR	Nei	Average of Ratios	Both	0.0398309	0.000172897	11111616
ASW	PUR	Nei	Ratio of Averages	Both	0.0602953	0.000309459	11111616
ASW	PUR	WH	Average of Ratios	Both	0.0315055	0.000139868	11111616
ASW	PUR	WH	Ratio of Averages	Both	0.0555532	0.000276554	11111616
ASW	PUR	Population-specific (ASW)	Average of Ratios	Both	-0.0660702	0.000589566	11111616
ASW	PUR	Population-specific (ASW)	Ratio of Averages	Both	0.00531837	0.000459559	11111616
ASW	PUR	Population-specific (PUR)	Average of Ratios	Both	0.139726	0.000716438	11111616
ASW	PUR	Population-specific (PUR)	Ratio of Averages	Both	0.111268	0.000740025	11111616
ASW	PUR	WC	Average of Ratios	Either	0.0269052	7.026e-05	20696708
ASW	PUR	WC	Ratio of Averages	Either	0.0581788	0.000227558	20696708
ASW	PUR	Hudson	Average of Ratios	Either	0.025341	7.15172e-05	20696708
ASW	PUR	Hudson	Ratio of Averages	Either	0.0564646	0.000230034	20696708
ASW	PUR	Nei	Average of Ratios	Either	0.0271169	8.14396e-05	20696708
ASW	PUR	Nei	Ratio of Averages	Either	0.0583486	0.000244581	20696708
ASW	PUR	WH	Average of Ratios	Either	0.0106717	6.83714e-05	20696708
ASW	PUR	WH	Ratio of Averages	Either	0.0517692	0.000218466	20696708
ASW	PUR	Population-specific (ASW)	Average of Ratios	Either	-0.258266	0.00053061	20696708
ASW	PUR	Population-specific (ASW)	Ratio of Averages	Either	-0.0343124	0.000412474	20696708
ASW	PUR	Population-specific (PUR)	Average of Ratios	Either	0.308947	0.00057415	20696708
ASW	PUR	Population-specific (PUR)	Ratio of Averages	Either	0.147242	0.00062807	20696708
ASW	TSI	WC	Average of Ratios	YRI	0.0566841	0.000142157	15064568
ASW	TSI	WC	Ratio of Averages	YRI	0.089554	0.000358831	15064568
ASW	TSI	Hudson	Average of Ratios	YRI	0.047249	0.000127655	15064568
ASW	TSI	Hudson	Ratio of Averages	YRI	0.0844392	0.000337733	15064568
ASW	TSI	Nei	Average of Ratios	YRI	0.0516235	0.000152423	15064568
ASW	TSI	Nei	Ratio of Averages	YRI	0.0884534	0.000369357	15064568
ASW	TSI	WH	Average of Ratios	YRI	0.168088	0.000236295	15064568
ASW	TSI	WH	Ratio of Averages	YRI	0.120131	0.000441883	15064568
ASW	TSI	Population-specific (ASW)	Average of Ratios	YRI	-0.472034	0.000678443	15064568
ASW	TSI	Population-specific (ASW)	Ratio of Averages	YRI	-0.0689369	0.000524804	15064568
ASW	TSI	Population-specific (TSI)	Average of Ratios	YRI	0.566532	0.000753878	15064568
ASW	TSI	Population-specific (TSI)	Ratio of Averages	YRI	0.237815	0.000883526	15064568
ASW	TSI	WC	Average of Ratios	ASW	0.0490711	0.000118693	18307185
ASW	TSI	WC	Ratio of Averages	ASW	0.0881006	0.00034324	18307185
ASW	TSI	Hudson	Average of Ratios	ASW	0.0406238	0.000106748	18307185
ASW	TSI	Hudson	Ratio of Averages	ASW	0.083303	0.000324037	18307185
ASW	TSI	Nei	Average of Ratios	ASW	0.0443402	0.000127263	18307185
ASW	TSI	Nei	Ratio of Averages	ASW	0.0872108	0.000353956	18307185
ASW	TSI	WH	Average of Ratios	ASW	0.166057	0.00020718	18307185
ASW	TSI	WH	Ratio of Averages	ASW	0.116294	0.000426016	18307185
ASW	TSI	Population-specific (ASW)	Average of Ratios	ASW	-0.498401	0.000632021	18307185
ASW	TSI	Population-specific (ASW)	Ratio of Averages	ASW	-0.05847	0.000531644	18307185
ASW	TSI	Population-specific (TSI)	Average of Ratios	ASW	0.579648	0.000687576	18307185
ASW	TSI	Population-specific (TSI)	Ratio of Averages	ASW	0.225076	0.000865375	18307185
ASW	TSI	WC	Average of Ratios	TSI	0.0463245	0.000177073	11633602
ASW	TSI	WC	Ratio of Averages	TSI	0.0846503	0.000400589	11633602
ASW	TSI	Hudson	Average of Ratios	TSI	0.0439264	0.000164313	11633602
ASW	TSI	Hudson	Ratio of Averages	TSI	0.0828245	0.000392323	11633602
ASW	TSI	Nei	Average of Ratios	TSI	0.0485627	0.000197923	11633602
ASW	TSI	Nei	Ratio of Averages	TSI	0.0866793	0.000428281	11633602
ASW	TSI	WH	Average of Ratios	TSI	-0.00806235	0.000286079	11633602
ASW	TSI	WH	Ratio of Averages	TSI	0.0859429	0.000486844	11633602
ASW	TSI	Population-specific (ASW)	Average of Ratios	TSI	0.267337	0.000753115	11633602
ASW	TSI	Population-specific (ASW)	Ratio of Averages	TSI	0.0694236	0.000530944	11633602
ASW	TSI	Population-specific (TSI)	Average of Ratios	TSI	-0.179485	0.000863485	11633602
ASW	TSI	Population-specific (TSI)	Ratio of Averages	TSI	0.0962253	0.000901645	11633602
ASW	TSI	WC	Average of Ratios	Both	0.0610138	0.000260908	8600009
ASW	TSI	WC	Ratio of Averages	Both	0.0859464	0.00044258	8600009
ASW	TSI	Hudson	Average of Ratios	Both	0.0570383	0.000242065	8600009
ASW	TSI	Hudson	Ratio of Averages	Both	0.0837666	0.000431519	8600009
ASW	TSI	Nei	Average of Ratios	Both	0.0632606	0.0002924	8600009
ASW	TSI	Nei	Ratio of Averages	Both	0.0877093	0.000471539	8600009
ASW	TSI	WH	Average of Ratios	Both	0.0682413	0.000374562	8600009
ASW	TSI	WH	Ratio of Averages	Both	0.0905091	0.000537148	8600009
ASW	TSI	Population-specific (ASW)	Average of Ratios	Both	0.00889581	0.000757992	8600009
ASW	TSI	Population-specific (ASW)	Ratio of Averages	Both	0.0547923	0.000565918	8600009
ASW	TSI	Population-specific (TSI)	Average of Ratios	Both	0.105181	0.000974362	8600009
ASW	TSI	Population-specific (TSI)	Ratio of Averages	Both	0.112741	0.000991479	8600009
ASW	TSI	WC	Average of Ratios	Either	0.0427611	9.92018e-05	21340778
ASW	TSI	WC	Ratio of Averages	Either	0.0868989	0.000324526	21340778
ASW	TSI	Hudson	Average of Ratios	Either	0.0358094	8.91348e-05	21340778
ASW	TSI	Hudson	Ratio of Averages	Either	0.0824848	0.000307733	21340778
ASW	TSI	Nei	Average of Ratios	Either	0.0390174	0.000106034	21340778
ASW	TSI	Nei	Ratio of Averages	Either	0.0863164	0.000335857	21340778
ASW	TSI	WH	Average of Ratios	Either	0.110557	0.00018201	21340778
ASW	TSI	WH	Ratio of Averages	Either	0.111949	0.000402638	21340778
ASW	TSI	Population-specific (ASW)	Average of Ratios	Either	-0.285403	0.00055091	21340778
ASW	TSI	Population-specific (ASW)	Ratio of Averages	Either	-0.0441317	0.000498099	21340778
ASW	TSI	Population-specific (TSI)	Average of Ratios	Either	0.357022	0.00060621	21340778
ASW	TSI	Population-specific (TSI)	Ratio of Averages	Either	0.209101	0.000812544	21340778
ASW	YRI	WC	Average of Ratios	YRI	0.00630589	2.68054e-05	17814120
ASW	YRI	WC	Ratio of Averages	YRI	0.0106871	5.73388e-05	17814120
ASW	YRI	Hudson	Average of Ratios	YRI	0.00497176	2.63019e-05	17814120
ASW	YRI	Hudson	Ratio of Averages	YRI	0.0090304	5.76085e-05	17814120
ASW	YRI	Nei	Average of Ratios	YRI	0.00515537	2.74115e-05	17814120
ASW	YRI	Nei	Ratio of Averages	YRI	0.00910269	5.83322e-05	17814120
ASW	YRI	WH	Average of Ratios	YRI	-0.0256029	7.58621e-05	17814120
ASW	YRI	WH	Ratio of Averages	YRI	0.00580704	6.87217e-05	17814120
ASW	YRI	Population-specific (ASW)	Average of Ratios	YRI	0.173699	0.000399237	17814120
ASW	YRI	Population-specific (ASW)	Ratio of Averages	YRI	0.0268186	0.000209709	17814120
ASW	YRI	Population-specific (YRI)	Average of Ratios	YRI	-0.163755	0.000397504	17814120
ASW	YRI	Population-specific (YRI)	Ratio of Averages	YRI	-0.00875776	0.000211237	17814120
ASW	YRI	WC	Average of Ratios	ASW	0.00770884	2.75395e-05	18307185
ASW	YRI	WC	Ratio of Averages	ASW	0.0109614	5.73491e-05	18307185
ASW	YRI	Hudson	Average of Ratios	ASW	0.00506125	2.6368e-05	18307185
ASW	YRI	Hudson	Ratio of Averages	ASW	0.0091809	5.72899e-05	18307185
ASW	YRI	Nei	Average of Ratios	ASW	0.00525591	2.75078e-05	18307185
ASW	YRI	Nei	Ratio of Averages	ASW	0.00925528	5.80195e-05	18307185
ASW	YRI	WH	Average of Ratios	ASW	0.0380812	7.95777e-05	18307185
ASW	YRI	WH	Ratio of Averages	ASW	0.0113764	6.92523e-05	18307185
ASW	YRI	Population-specific (ASW)	Average of Ratios	ASW	-0.17716	0.000408824	18307185
ASW	YRI	Population-specific (ASW)	Ratio of Averages	ASW	-0.00293503	0.00020934	18307185
ASW	YRI	Population-specific (YRI)	Average of Ratios	ASW	0.187283	0.000410785	18307185
ASW	YRI	Population-specific (YRI)	Ratio of Averages	ASW	0.0212968	0.000213375	18307185
ASW	YRI	WC	Average of Ratios	YRI	0.00630589	2.68054e-05	17814120
ASW	YRI	WC	Ratio of Averages	YRI	0.0106871	5.73388e-05	17814120
ASW	YRI	Hudson	Average of Ratios	YRI	0.00497176	2.63019e-05	17814120
ASW	YRI	Hudson	Ratio of Averages	YRI	0.0090304	5.76085e-05	17814120
ASW	YRI	Nei	Average of Ratios	YRI	0.00515537	2.74115e-05	17814120
ASW	YRI	Nei	Ratio of Averages	YRI	0.00910269	5.83322e-05	17814120
ASW	YRI	WH	Average of Ratios	YRI	-0.0256029	7.58621e-05	17814120
ASW	YRI	WH	Ratio of Averages	YRI	0.00580704	6.87217e-05	17814120
ASW	YRI	Population-specific (ASW)	Average of Ratios	YRI	0.173699	0.000399237	17814120
ASW	YRI	Population-specific (ASW)	Ratio of Averages	YRI	0.0268186	0.000209709	17814120
ASW	YRI	Population-specific (YRI)	Average of Ratios	YRI	-0.163755	0.000397504	17814120
ASW	YRI	Population-specific (YRI)	Ratio of Averages	YRI	-0.00875776	0.000211237	17814120
ASW	YRI	WC	Average of Ratios	Both	0.0066341	3.31651e-05	14870326
ASW	YRI	WC	Ratio of Averages	Both	0.0106875	6.07318e-05	14870326
ASW	YRI	Hudson	Average of Ratios	Both	0.00478316	3.24219e-05	14870326
ASW	YRI	Hudson	Ratio of Averages	Both	0.00898033	6.08848e-05	14870326
ASW	YRI	Nei	Average of Ratios	Both	0.00498795	3.38079e-05	14870326
ASW	YRI	Nei	Ratio of Averages	Both	0.00905207	6.1647e-05	14870326
ASW	YRI	WH	Average of Ratios	Both	0.00381597	6.31619e-05	14870326
ASW	YRI	WH	Ratio of Averages	Both	0.00796737	7.16102e-05	14870326
ASW	YRI	Population-specific (ASW)	Average of Ratios	Both	0.0101206	0.000305666	14870326
ASW	YRI	Population-specific (ASW)	Ratio of Averages	Both	0.0145704	0.000211358	14870326
ASW	YRI	Population-specific (YRI)	Average of Ratios	Both	-0.000554255	0.000304207	14870326
ASW	YRI	Population-specific (YRI)	Ratio of Averages	Both	0.00339031	0.000213029	14870326
ASW	YRI	WC	Average of Ratios	Either	0.00728482	2.32097e-05	21250979
ASW	YRI	WC	Ratio of Averages	Either	0.0109571	5.48921e-05	21250979
ASW	YRI	Hudson	Average of Ratios	Either	0.00518083	2.22938e-05	21250979
ASW	YRI	Hudson	Ratio of Averages	Either	0.00922763	5.49503e-05	21250979
ASW	YRI	Nei	Average of Ratios	Either	0.00535914	2.32453e-05	21250979
ASW	YRI	Nei	Ratio of Averages	Either	0.00930253	5.56522e-05	21250979
ASW	YRI	WH	Average of Ratios	Either	0.00867356	7.79163e-05	21250979
ASW	YRI	WH	Ratio of Averages	Either	0.00921279	6.69805e-05	21250979
ASW	YRI	Population-specific (ASW)	Average of Ratios	Either	-0.0140939	0.000408786	21250979
ASW	YRI	Population-specific (ASW)	Ratio of Averages	Either	0.00930951	0.000204032	21250979
ASW	YRI	Population-specific (YRI)	Average of Ratios	Either	0.0244555	0.000409963	21250979
ASW	YRI	Population-specific (YRI)	Ratio of Averages	Either	0.00914575	0.00020854	21250979
CEU	CEU14	WC	Average of Ratios	YRI	-0.00156138	5.42198e-05	7160258
CEU	CEU14	WC	Ratio of Averages	YRI	-0.000533847	7.77497e-05	7160258
CEU	CEU14	Hudson	Average of Ratios	YRI	-0.00385467	6.31125e-05	7160258
CEU	CEU14	Hudson	Ratio of Averages	YRI	-0.00579582	8.02893e-05	7160258
CEU	CEU14	Nei	Average of Ratios	YRI	-0.00366699	6.51682e-05	7160258
CEU	CEU14	Nei	Ratio of Averages	YRI	-0.00583994	8.0673e-05	7160258
CEU	CEU14	WH	Average of Ratios	YRI	-0.102764	0.000625769	7160258
CEU	CEU14	WH	Ratio of Averages	YRI	-0.00642151	0.000224554	7160258
CEU	CEU14	Population-specific (CEU)	Average of Ratios	YRI	-0.14177	0.000881443	7160258
CEU	CEU14	Population-specific (CEU)	Ratio of Averages	YRI	-0.00666826	0.000312306	7160258
CEU	CEU14	Population-specific (CEU14)	Average of Ratios	YRI	0.134061	0.000935473	7160258
CEU	CEU14	Population-specific (CEU14)	Ratio of Averages	YRI	-0.00492338	0.000354757	7160258
CEU	CEU14	WC	Average of Ratios	CEU	-0.00229092	4.28117e-05	10858788
CEU	CEU14	WC	Ratio of Averages	CEU	-0.000544401	8.01258e-05	10858788
CEU	CEU14	Hudson	Average of Ratios	CEU	-0.00299864	5.02054e-05	10858788
CEU	CEU14	Hudson	Ratio of Averages	CEU	-0.00580424	8.2798e-05	10858788
CEU	CEU14	Nei	Average of Ratios	CEU	-0.00285439	5.1792e-05	10858788
CEU	CEU14	Nei	Ratio of Averages	CEU	-0.0058484	8.31931e-05	10858788
CEU	CEU14	WH	Average of Ratios	CEU	-0.1876	0.000596195	10858788
CEU	CEU14	WH	Ratio of Averages	CEU	-0.00649142	0.000242369	10858788
CEU	CEU14	Population-specific (CEU)	Average of Ratios	CEU	-0.2604	0.000838846	10858788
CEU	CEU14	Population-specific (CEU)	Ratio of Averages	CEU	-0.00676242	0.000337502	10858788
CEU	CEU14	Population-specific (CEU14)	Average of Ratios	CEU	0.254403	0.000882907	10858788
CEU	CEU14	Population-specific (CEU14)	Ratio of Averages	CEU	-0.00484606	0.000381045	10858788
CEU	CEU14	WC	Average of Ratios	CEU14	-0.00020403	6.35086e-05	7454856
CEU	CEU14	WC	Ratio of Averages	CEU14	-0.000757021	8.7884e-05	7454856
CEU	CEU14	Hudson	Average of Ratios	CEU14	-0.0084952	6.39427e-05	7454856
CEU	CEU14	Hudson	Ratio of Averages	CEU14	-0.00664901	8.86118e-05	7454856
CEU	CEU14	Nei	Average of Ratios	CEU14	-0.00838297	6.59546e-05	7454856
CEU	CEU14	Nei	Ratio of Averages	CEU14	-0.00669804	8.8976e-05	7454856
CEU	CEU14	WH	Average of Ratios	CEU14	0.0471187	0.000381578	7454856
CEU	CEU14	WH	Ratio of Averages	CEU14	0.0101674	0.000239861	7454856
CEU	CEU14	Population-specific (CEU)	Average of Ratios	CEU14	0.069051	0.000534263	7454856
CEU	CEU14	Population-specific (CEU)	Ratio of Averages	CEU14	0.0167993	0.000330985	7454856
CEU	CEU14	Population-specific (CEU14)	Average of Ratios	CEU14	-0.0860414	0.000562967	7454856
CEU	CEU14	Population-specific (CEU14)	Ratio of Averages	CEU14	-0.0300973	0.000368028	7454856
CEU	CEU14	WC	Average of Ratios	Both	-0.00020403	6.35086e-05	7454856
CEU	CEU14	WC	Ratio of Averages	Both	-0.000757021	8.7884e-05	7454856
CEU	CEU14	Hudson	Average of Ratios	Both	-0.0084952	6.39427e-05	7454856
CEU	CEU14	Hudson	Ratio of Averages	Both	-0.00664901	8.86118e-05	7454856
CEU	CEU14	Nei	Average of Ratios	Both	-0.00838297	6.59546e-05	7454856
CEU	CEU14	Nei	Ratio of Averages	Both	-0.00669804	8.8976e-05	7454856
CEU	CEU14	WH	Average of Ratios	Both	0.0471187	0.000381578	7454856
CEU	CEU14	WH	Ratio of Averages	Both	0.0101674	0.000239861	7454856
CEU	CEU14	Population-specific (CEU)	Average of Ratios	Both	0.069051	0.000534263	7454856
CEU	CEU14	Population-specific (CEU)	Ratio of Averages	Both	0.0167993	0.000330985	7454856
CEU	CEU14	Population-specific (CEU14)	Average of Ratios	Both	-0.0860414	0.000562967	7454856
CEU	CEU14	Population-specific (CEU14)	Ratio of Averages	Both	-0.0300973	0.000368028	7454856
CEU	CEU14	WC	Average of Ratios	Either	-0.00229092	4.28117e-05	10858788
CEU	CEU14	WC	Ratio of Averages	Either	-0.000544401	8.01258e-05	10858788
CEU	CEU14	Hudson	Average of Ratios	Either	-0.00299864	5.02054e-05	10858788
CEU	CEU14	Hudson	Ratio of Averages	Either	-0.00580424	8.2798e-05	10858788
CEU	CEU14	Nei	Average of Ratios	Either	-0.00285439	5.1792e-05	10858788
CEU	CEU14	Nei	Ratio of Averages	Either	-0.0058484	8.31931e-05	10858788
CEU	CEU14	WH	Average of Ratios	Either	-0.1876	0.000596195	10858788
CEU	CEU14	WH	Ratio of Averages	Either	-0.00649142	0.000242369	10858788
CEU	CEU14	Population-specific (CEU)	Average of Ratios	Either	-0.2604	0.000838846	10858788
CEU	CEU14	Population-specific (CEU)	Ratio of Averages	Either	-0.00676242	0.000337502	10858788
CEU	CEU14	Population-specific (CEU14)	Average of Ratios	Either	0.254403	0.000882907	10858788
CEU	CEU14	Population-specific (CEU14)	Ratio of Averages	Either	-0.00484606	0.000381045	10858788
CEU	CHB	WC	Average of Ratios	YRI	0.0734422	0.000304627	7799780
CEU	CHB	WC	Ratio of Averages	YRI	0.10744	0.000567699	7799780
CEU	CHB	Hudson	Average of Ratios	YRI	0.0716137	0.000303236	7799780
CEU	CHB	Hudson	Ratio of Averages	YRI	0.105967	0.00056669	7799780
CEU	CHB	Nei	Average of Ratios	YRI	0.0809125	0.000379931	7799780
CEU	CHB	Nei	Ratio of Averages	YRI	0.112189	0.000633429	7799780
CEU	CHB	WH	Average of Ratios	YRI	0.0780739	0.000316432	7799780
CEU	CHB	WH	Ratio of Averages	YRI	0.107969	0.000574367	7799780
CEU	CHB	Population-specific (CEU)	Average of Ratios	YRI	-0.0263651	0.00122292	7799780
CEU	CHB	Population-specific (CEU)	Ratio of Averages	YRI	0.0756091	0.000903221	7799780
CEU	CHB	Population-specific (CHB)	Average of Ratios	YRI	0.169593	0.00124684	7799780
CEU	CHB	Population-specific (CHB)	Ratio of Averages	YRI	0.136325	0.00100195	7799780
CEU	CHB	WC	Average of Ratios	CEU	0.0580794	0.000257321	10858788
CEU	CHB	WC	Ratio of Averages	CEU	0.105277	0.000624375	10858788
CEU	CHB	Hudson	Average of Ratios	CEU	0.0557565	0.000255772	10858788
CEU	CHB	Hudson	Ratio of Averages	CEU	0.103543	0.000621741	10858788
CEU	CHB	Nei	Average of Ratios	CEU	0.0626794	0.00031988	10858788
CEU	CHB	Nei	Ratio of Averages	CEU	0.109484	0.000693198	10858788
CEU	CHB	WH	Average of Ratios	CEU	0.0824117	0.00026346	10858788
CEU	CHB	WH	Ratio of Averages	CEU	0.107831	0.000631214	10858788
CEU	CHB	Population-specific (CEU)	Average of Ratios	CEU	-0.348513	0.00111829	10858788
CEU	CHB	Population-specific (CEU)	Ratio of Averages	CEU	0.0385205	0.000984901	10858788
CEU	CHB	Population-specific (CHB)	Average of Ratios	CEU	0.460026	0.00110343	10858788
CEU	CHB	Population-specific (CHB)	Ratio of Averages	CEU	0.168566	0.00111157	10858788
CEU	CHB	WC	Average of Ratios	CHB	0.0580344	0.00027599	10162696
CEU	CHB	WC	Ratio of Averages	CHB	0.105182	0.000640691	10162696
CEU	CHB	Hudson	Average of Ratios	CHB	0.057086	0.000275353	10162696
CEU	CHB	Hudson	Ratio of Averages	CHB	0.104072	0.000641595	10162696
CEU	CHB	Nei	Average of Ratios	CHB	0.0643723	0.000345319	10162696
CEU	CHB	Nei	Ratio of Averages	CHB	0.110071	0.000715718	10162696
CEU	CHB	WH	Average of Ratios	CHB	0.0361758	0.000293909	10162696
CEU	CHB	WH	Ratio of Averages	CHB	0.102919	0.000650016	10162696
CEU	CHB	Population-specific (CEU)	Average of Ratios	CHB	0.374224	0.00108174	10162696
CEU	CHB	Population-specific (CEU)	Ratio of Averages	CHB	0.121552	0.00100335	10162696
CEU	CHB	Population-specific (CHB)	Average of Ratios	CHB	-0.260052	0.00115559	10162696
CEU	CHB	Population-specific (CHB)	Ratio of Averages	CHB	0.0865909	0.00111473	10162696
CEU	CHB	WC	Average of Ratios	Both	0.0794681	0.000450152	6627493
CEU	CHB	WC	Ratio of Averages	Both	0.105732	0.000724473	6627493
CEU	CHB	Hudson	Average of Ratios	Both	0.0778543	0.000448205	6627493
CEU	CHB	Hudson	Ratio of Averages	Both	0.104354	0.000723661	6627493
CEU	CHB	Nei	Average of Ratios	Both	0.0883425	0.000564255	6627493
CEU	CHB	Nei	Ratio of Averages	Both	0.110387	0.00080751	6627493
CEU	CHB	WH	Average of Ratios	Both	0.0803221	0.000462852	6627493
CEU	CHB	WH	Ratio of Averages	Both	0.105541	0.000734119	6627493
CEU	CHB	Population-specific (CEU)	Average of Ratios	Both	0.0404266	0.00121871	6627493
CEU	CHB	Population-specific (CEU)	Ratio of Averages	Both	0.0863547	0.00107051	6627493
CEU	CHB	Population-specific (CHB)	Average of Ratios	Both	0.115282	0.00130618	6627493
CEU	CHB	Population-specific (CHB)	Ratio of Averages	Both	0.122354	0.0012259	6627493
CEU	CHB	WC	Average of Ratios	Either	0.0481995	0.000187138	14393991
CEU	CHB	WC	Ratio of Averages	Either	0.104771	0.000564549	14393991
CEU	CHB	Hudson	Average of Ratios	Either	0.0465206	0.000186383	14393991
CEU	CHB	Hudson	Ratio of Averages	Either	0.103305	0.000563625	14393991
CEU	CHB	Nei	Average of Ratios	Either	0.0520585	0.000232247	14393991
CEU	CHB	Nei	Ratio of Averages	Either	0.109217	0.00062824	14393991
CEU	CHB	WH	Average of Ratios	Either	0.0507295	0.000197605	14393991
CEU	CHB	WH	Ratio of Averages	Either	0.105258	0.000571169	14393991
CEU	CHB	Population-specific (CEU)	Average of Ratios	Either	-0.0173146	0.000927649	14393991
CEU	CHB	Population-specific (CEU)	Ratio of Averages	Either	0.073682	0.000936732	14393991
CEU	CHB	Population-specific (CHB)	Average of Ratios	Either	0.110356	0.000938614	14393991
CEU	CHB	Population-specific (CHB)	Ratio of Averages	Either	0.132928	0.0010256	14393991
CEU	CHB14	WC	Average of Ratios	YRI	0.0796496	0.000370349	7465953
CEU	CHB14	WC	Ratio of Averages	YRI	0.107083	0.000606039	7465953
CEU	CHB14	Hudson	Average of Ratios	YRI	0.0720191	0.00034577	7465953
CEU	CHB14	Hudson	Ratio of Averages	YRI	0.105739	0.000632605	7465953
CEU	CHB14	Nei	Average of Ratios	YRI	0.0833324	0.000439743	7465953
CEU	CHB14	Nei	Ratio of Averages	YRI	0.112721	0.000711461	7465953
CEU	CHB14	WH	Average of Ratios	YRI	-0.0599292	0.00094969	7465953
CEU	CHB14	WH	Ratio of Averages	YRI	0.0837127	0.000789046	7465953
CEU	CHB14	Population-specific (CEU)	Average of Ratios	YRI	-0.111965	0.00129264	7465953
CEU	CHB14	Population-specific (CEU)	Ratio of Averages	YRI	0.0750262	0.000950924	7465953
CEU	CHB14	Population-specific (CHB14)	Average of Ratios	YRI	0.256004	0.00135071	7465953
CEU	CHB14	Population-specific (CHB14)	Ratio of Averages	YRI	0.136452	0.0011259	7465953
CEU	CHB14	WC	Average of Ratios	CEU	0.0508155	0.0002875	10858788
CEU	CHB14	WC	Ratio of Averages	CEU	0.101479	0.000643873	10858788
CEU	CHB14	Hudson	Average of Ratios	CEU	0.0544412	0.000276997	10858788
CEU	CHB14	Hudson	Ratio of Averages	CEU	0.103315	0.000688114	10858788
CEU	CHB14	Nei	Average of Ratios	CEU	0.0625138	0.000351594	10858788
CEU	CHB14	Nei	Ratio of Averages	CEU	0.109968	0.000771711	10858788
CEU	CHB14	WH	Average of Ratios	CEU	-0.262759	0.000851794	10858788
CEU	CHB14	WH	Ratio of Averages	CEU	0.0566709	0.000861261	10858788
CEU	CHB14	Population-specific (CEU)	Average of Ratios	CEU	-0.387851	0.00116024	10858788
CEU	CHB14	Population-specific (CEU)	Ratio of Averages	CEU	0.0382759	0.00104078	10858788
CEU	CHB14	Population-specific (CHB14)	Average of Ratios	CEU	0.496734	0.00117747	10858788
CEU	CHB14	Population-specific (CHB14)	Ratio of Averages	CEU	0.168355	0.00123703	10858788
CEU	CHB14	WC	Average of Ratios	CHB14	0.104219	0.000515448	6795740
CEU	CHB14	WC	Ratio of Averages	CHB14	0.108383	0.000787453	6795740
CEU	CHB14	Hudson	Average of Ratios	CHB14	0.0654761	0.000436268	6795740
CEU	CHB14	Hudson	Ratio of Averages	CHB14	0.0980764	0.000762456	6795740
CEU	CHB14	Nei	Average of Ratios	CHB14	0.0762369	0.000556401	6795740
CEU	CHB14	Nei	Ratio of Averages	CHB14	0.104209	0.000851402	6795740
CEU	CHB14	WH	Average of Ratios	CHB14	0.217304	0.00095052	6795740
CEU	CHB14	WH	Ratio of Averages	CHB14	0.1392	0.000966232	6795740
CEU	CHB14	Population-specific (CEU)	Average of Ratios	CHB14	0.277179	0.00126073	6795740
CEU	CHB14	Population-specific (CEU)	Ratio of Averages	CHB14	0.155418	0.00114178	6795740
CEU	CHB14	Population-specific (CHB14)	Average of Ratios	CHB14	-0.146227	0.00128569	6795740
CEU	CHB14	Population-specific (CHB14)	Ratio of Averages	CHB14	0.0407345	0.00122206	6795740
CEU	CHB14	WC	Average of Ratios	Both	0.0888915	0.000585933	5593810
CEU	CHB14	WC	Ratio of Averages	Both	0.10484	0.000810399	5593810
CEU	CHB14	Hudson	Average of Ratios	Both	0.0724602	0.000534861	5593810
CEU	CHB14	Hudson	Ratio of Averages	Both	0.0981716	0.000808098	5593810
CEU	CHB14	Nei	Average of Ratios	Both	0.0847199	0.000682016	5593810
CEU	CHB14	Nei	Ratio of Averages	Both	0.104286	0.000902171	5593810
CEU	CHB14	WH	Average of Ratios	Both	0.107894	0.000924283	5593810
CEU	CHB14	WH	Ratio of Averages	Both	0.113966	0.000977347	5593810
CEU	CHB14	Population-specific (CEU)	Average of Ratios	Both	0.121868	0.00119325	5593810
CEU	CHB14	Population-specific (CEU)	Ratio of Averages	Both	0.120195	0.00113941	5593810
CEU	CHB14	Population-specific (CHB14)	Average of Ratios	Both	0.0230522	0.00126142	5593810
CEU	CHB14	Population-specific (CHB14)	Ratio of Averages	Both	0.0761481	0.0012613	5593810
CEU	CHB14	WC	Average of Ratios	Either	0.0632464	0.000277719	12060718
CEU	CHB14	WC	Ratio of Averages	Either	0.104535	0.000631849	12060718
CEU	CHB14	Hudson	Average of Ratios	Either	0.0523017	0.000250129	12060718
CEU	CHB14	Hudson	Ratio of Averages	Either	0.103043	0.000658523	12060718
CEU	CHB14	Nei	Average of Ratios	Either	0.0599469	0.000317505	12060718
CEU	CHB14	Nei	Ratio of Averages	Either	0.109694	0.000738539	12060718
CEU	CHB14	WH	Average of Ratios	Either	-0.164173	0.000849731	12060718
CEU	CHB14	WH	Ratio of Averages	Either	0.0815508	0.000843882	12060718
CEU	CHB14	Population-specific (CEU)	Average of Ratios	Either	-0.249543	0.00116383	12060718
CEU	CHB14	Population-specific (CEU)	Ratio of Averages	Either	0.0730749	0.00102584	12060718
CEU	CHB14	Population-specific (CHB14)	Average of Ratios	Either	0.354146	0.00118485	12060718
CEU	CHB14	Population-specific (CHB14)	Ratio of Averages	Either	0.133012	0.00120171	12060718
CEU	CHS	WC	Average of Ratios	YRI	0.0754558	0.000311056	7815476
CEU	CHS	WC	Ratio of Averages	YRI	0.110578	0.000582625	7815476
CEU	CHS	Hudson	Average of Ratios	YRI	0.0734366	0.00030899	7815476
CEU	CHS	Hudson	Ratio of Averages	YRI	0.10905	0.000580998	7815476
CEU	CHS	Nei	Average of Ratios	YRI	0.0831771	0.000389289	7815476
CEU	CHS	Nei	Ratio of Averages	YRI	0.115636	0.000651514	7815476
CEU	CHS	WH	Average of Ratios	YRI	0.0816942	0.000327492	7815476
CEU	CHS	WH	Ratio of Averages	YRI	0.111649	0.000591618	7815476
CEU	CHS	Population-specific (CEU)	Average of Ratios	YRI	-0.0284075	0.00123022	7815476
CEU	CHS	Population-specific (CEU)	Ratio of Averages	YRI	0.0769909	0.000915878	7815476
CEU	CHS	Population-specific (CHS)	Average of Ratios	YRI	0.175281	0.00125277	7815476
CEU	CHS	Population-specific (CHS)	Ratio of Averages	YRI	0.141109	0.00102361	7815476
CEU	CHS	WC	Average of Ratios	CEU	0.0599274	0.000264057	10858788
CEU	CHS	WC	Ratio of Averages	CEU	0.108422	0.000642242	10858788
CEU	CHS	Hudson	Average of Ratios	CEU	0.0573104	0.000261779	10858788
CEU	CHS	Hudson	Ratio of Averages	CEU	0.106565	0.000638476	10858788
CEU	CHS	Nei	Average of Ratios	CEU	0.0645787	0.000329186	10858788
CEU	CHS	Nei	Ratio of Averages	CEU	0.112854	0.000714102	10858788
CEU	CHS	WH	Average of Ratios	CEU	0.0906325	0.000273663	10858788
CEU	CHS	WH	Ratio of Averages	CEU	0.111983	0.000651785	10858788
CEU	CHS	Population-specific (CEU)	Average of Ratios	CEU	-0.353661	0.00112185	10858788
CEU	CHS	Population-specific (CEU)	Ratio of Averages	CEU	0.0397416	0.000997933	10858788
CEU	CHS	Population-specific (CHS)	Average of Ratios	CEU	0.468282	0.0011069	10858788
CEU	CHS	Population-specific (CHS)	Ratio of Averages	CEU	0.173389	0.00113993	10858788
CEU	CHS	WC	Average of Ratios	CHS	0.0579747	0.000278609	10147887
CEU	CHS	WC	Ratio of Averages	CHS	0.107324	0.000658959	10147887
CEU	CHS	Hudson	Average of Ratios	CHS	0.0572104	0.000277982	10147887
CEU	CHS	Hudson	Ratio of Averages	CHS	0.106331	0.000660337	10147887
CEU	CHS	Nei	Average of Ratios	CHS	0.0646723	0.000350982	10147887
CEU	CHS	Nei	Ratio of Averages	CHS	0.112591	0.000738352	10147887
CEU	CHS	WH	Average of Ratios	CHS	0.0292055	0.000302381	10147887
CEU	CHS	WH	Ratio of Averages	CHS	0.104363	0.000670459	10147887
CEU	CHS	Population-specific (CEU)	Average of Ratios	CHS	0.402603	0.00107601	10147887
CEU	CHS	Population-specific (CEU)	Ratio of Averages	CHS	0.130611	0.00102066	10147887
CEU	CHS	Population-specific (CHS)	Average of Ratios	CHS	-0.288183	0.0011484	10147887
CEU	CHS	Population-specific (CHS)	Ratio of Averages	CHS	0.0820515	0.00112172	10147887
CEU	CHS	WC	Average of Ratios	Both	0.0815225	0.000472206	6432294
CEU	CHS	WC	Ratio of Averages	Both	0.108073	0.000751454	6432294
CEU	CHS	Hudson	Average of Ratios	Both	0.0799454	0.00046968	6432294
CEU	CHS	Hudson	Ratio of Averages	Both	0.106735	0.000750415	6432294
CEU	CHS	Nei	Average of Ratios	Both	0.0909924	0.000594172	6432294
CEU	CHS	Nei	Ratio of Averages	Both	0.113043	0.000839435	6432294
CEU	CHS	WH	Average of Ratios	Both	0.0817637	0.000489037	6432294
CEU	CHS	WH	Ratio of Averages	Both	0.107734	0.000764769	6432294
CEU	CHS	Population-specific (CEU)	Average of Ratios	Both	0.0575194	0.001219	6432294
CEU	CHS	Population-specific (CEU)	Ratio of Averages	Both	0.0944091	0.00108632	6432294
CEU	CHS	Population-specific (CHS)	Average of Ratios	Both	0.102371	0.00131132	6432294
CEU	CHS	Population-specific (CHS)	Ratio of Averages	Both	0.119061	0.00125849	6432294
CEU	CHS	WC	Average of Ratios	Either	0.0490369	0.000189622	14574381
CEU	CHS	WC	Ratio of Averages	Either	0.1077	0.000578575	14574381
CEU	CHS	Hudson	Average of Ratios	Either	0.047251	0.000188445	14574381
CEU	CHS	Hudson	Ratio of Averages	Either	0.106192	0.000577104	14574381
CEU	CHS	Nei	Average of Ratios	Either	0.0529864	0.000235958	14574381
CEU	CHS	Nei	Ratio of Averages	Either	0.112436	0.0006452	14574381
CEU	CHS	WH	Average of Ratios	Either	0.0517761	0.000205201	14574381
CEU	CHS	WH	Ratio of Averages	Either	0.108652	0.000587627	14574381
CEU	CHS	Population-specific (CEU)	Average of Ratios	Either	-0.00855889	0.000924088	14574381
CEU	CHS	Population-specific (CEU)	Ratio of Averages	Either	0.075851	0.000947521	14574381
CEU	CHS	Population-specific (CHS)	Average of Ratios	Either	0.103061	0.000938975	14574381
CEU	CHS	Population-specific (CHS)	Ratio of Averages	Either	0.136533	0.00104534	14574381
CEU	CLM	WC	Average of Ratios	YRI	0.0137547	6.54642e-05	10112029
CEU	CLM	WC	Ratio of Averages	YRI	0.0170944	0.000118464	10112029
CEU	CLM	Hudson	Average of Ratios	YRI	0.0104717	6.19029e-05	10112029
CEU	CLM	Hudson	Ratio of Averages	YRI	0.0151346	0.000117279	10112029
CEU	CLM	Nei	Average of Ratios	YRI	0.0108808	6.57533e-05	10112029
CEU	CLM	Nei	Ratio of Averages	YRI	0.0153044	0.000119496	10112029
CEU	CLM	WH	Average of Ratios	YRI	0.0601659	0.000176303	10112029
CEU	CLM	WH	Ratio of Averages	YRI	0.0218741	0.000151354	10112029
CEU	CLM	Population-specific (CEU)	Average of Ratios	YRI	0.298698	0.000921011	10112029
CEU	CLM	Population-specific (CEU)	Ratio of Averages	YRI	0.0542238	0.000435749	10112029
CEU	CLM	Population-specific (CLM)	Average of Ratios	YRI	-0.277754	0.000904511	10112029
CEU	CLM	Population-specific (CLM)	Ratio of Averages	YRI	-0.0239545	0.000367362	10112029
CEU	CLM	WC	Average of Ratios	CEU	0.0106996	6.79627e-05	10858788
CEU	CLM	WC	Ratio of Averages	CEU	0.0164673	0.000127113	10858788
CEU	CLM	Hudson	Average of Ratios	CEU	0.00915122	6.51734e-05	10858788
CEU	CLM	Hudson	Ratio of Averages	CEU	0.0146847	0.00012667	10858788
CEU	CLM	Nei	Average of Ratios	CEU	0.00952646	6.91368e-05	10858788
CEU	CLM	Nei	Ratio of Averages	CEU	0.0148457	0.000129004	10858788
CEU	CLM	WH	Average of Ratios	CEU	-0.0210716	0.000145668	10858788
CEU	CLM	WH	Ratio of Averages	CEU	0.0153914	0.000160034	10858788
CEU	CLM	Population-specific (CEU)	Average of Ratios	CEU	-0.166141	0.000698195	10858788
CEU	CLM	Population-specific (CEU)	Ratio of Averages	CEU	0.0187836	0.000444454	10858788
CEU	CLM	Population-specific (CLM)	Average of Ratios	CEU	0.184443	0.000671518	10858788
CEU	CLM	Population-specific (CLM)	Ratio of Averages	CEU	0.0105858	0.000372938	10858788
CEU	CLM	WC	Average of Ratios	CLM	0.012757	5.81144e-05	13266798
CEU	CLM	WC	Ratio of Averages	CLM	0.0170065	0.000121608	13266798
CEU	CLM	Hudson	Average of Ratios	CLM	0.00922591	5.47501e-05	13266798
CEU	CLM	Hudson	Ratio of Averages	CLM	0.0150127	0.000120244	13266798
CEU	CLM	Nei	Average of Ratios	CLM	0.00958925	5.81158e-05	13266798
CEU	CLM	Nei	Ratio of Averages	CLM	0.0151802	0.000122503	13266798
CEU	CLM	WH	Average of Ratios	CLM	0.0721145	0.000155447	13266798
CEU	CLM	WH	Ratio of Averages	CLM	0.0229243	0.000156562	13266798
CEU	CLM	Population-specific (CEU)	Average of Ratios	CLM	0.37398	0.000812707	13266798
CEU	CLM	Population-specific (CEU)	Ratio of Averages	CLM	0.0609	0.000461282	13266798
CEU	CLM	Population-specific (CLM)	Average of Ratios	CLM	-0.355528	0.000798605	13266798
CEU	CLM	Population-specific (CLM)	Ratio of Averages	CLM	-0.0308747	0.000393072	13266798
CEU	CLM	WC	Average of Ratios	Both	0.0125491	8.94202e-05	8670593
CEU	CLM	WC	Ratio of Averages	Both	0.0165522	0.000136203	8670593
CEU	CLM	Hudson	Average of Ratios	Both	0.0103767	8.58306e-05	8670593
CEU	CLM	Hudson	Ratio of Averages	Both	0.0147172	0.000135502	8670593
CEU	CLM	Nei	Average of Ratios	Both	0.0108315	9.10763e-05	8670593
CEU	CLM	Nei	Ratio of Averages	Both	0.014879	0.000138003	8670593
CEU	CLM	WH	Average of Ratios	Both	0.0158517	0.000150509	8670593
CEU	CLM	WH	Ratio of Averages	Both	0.0172375	0.000170203	8670593
CEU	CLM	Population-specific (CEU)	Average of Ratios	Both	0.0421318	0.000632431	8670593
CEU	CLM	Population-specific (CEU)	Ratio of Averages	Both	0.0293345	0.000468618	8670593
CEU	CLM	Population-specific (CLM)	Average of Ratios	Both	-0.0213783	0.000591009	8670593
CEU	CLM	Population-specific (CLM)	Ratio of Averages	Both	9.99742e-05	0.000393396	8670593
CEU	CLM	WC	Average of Ratios	Either	0.0114281	4.81199e-05	15454993
CEU	CLM	WC	Ratio of Averages	Either	0.0169184	0.000115396	15454993
CEU	CLM	Hudson	Average of Ratios	Either	0.00852779	4.52856e-05	15454993
CEU	CLM	Hudson	Ratio of Averages	Either	0.0149782	0.000114302	15454993
CEU	CLM	Nei	Average of Ratios	Either	0.00884821	4.8075e-05	15454993
CEU	CLM	Nei	Ratio of Averages	Either	0.015145	0.000116445	15454993
CEU	CLM	WH	Average of Ratios	Either	0.0382059	0.000140952	15454993
CEU	CLM	WH	Ratio of Averages	Either	0.0210799	0.00014881	15454993
CEU	CLM	Population-specific (CEU)	Average of Ratios	Either	0.180661	0.000744834	15454993
CEU	CLM	Population-specific (CEU)	Ratio of Averages	Either	0.0503684	0.000436076	15454993
CEU	CLM	Population-specific (CLM)	Average of Ratios	Either	-0.163605	0.000731678	15454993
CEU	CLM	Population-specific (CLM)	Ratio of Averages	Either	-0.020412	0.000369714	15454993
CEU	FIN	WC	Average of Ratios	YRI	0.0070772	4.34051e-05	7579300
CEU	FIN	WC	Ratio of Averages	YRI	0.0079236	6.20575e-05	7579300
CEU	FIN	Hudson	Average of Ratios	YRI	0.00567271	4.36403e-05	7579300
CEU	FIN	Hudson	Ratio of Averages	YRI	0.00651727	6.21483e-05	7579300
CEU	FIN	Nei	Average of Ratios	YRI	0.00582386	4.4983e-05	7579300
CEU	FIN	Nei	Ratio of Averages	YRI	0.00655698	6.27307e-05	7579300
CEU	FIN	WH	Average of Ratios	YRI	0.00636241	5.28319e-05	7579300
CEU	FIN	WH	Ratio of Averages	YRI	0.00653335	6.31937e-05	7579300
CEU	FIN	Population-specific (CEU)	Average of Ratios	YRI	-0.00967315	0.000768456	7579300
CEU	FIN	Population-specific (CEU)	Ratio of Averages	YRI	0.00615969	0.00028893	7579300
CEU	FIN	Population-specific (FIN)	Average of Ratios	YRI	0.0210186	0.000760035	7579300
CEU	FIN	Population-specific (FIN)	Ratio of Averages	YRI	0.00687486	0.000286726	7579300
CEU	FIN	WC	Average of Ratios	CEU	0.00584811	3.55001e-05	10858788
CEU	FIN	WC	Ratio of Averages	CEU	0.00777191	6.50759e-05	10858788
CEU	FIN	Hudson	Average of Ratios	CEU	0.00431895	3.55813e-05	10858788
CEU	FIN	Hudson	Ratio of Averages	CEU	0.00635859	6.51403e-05	10858788
CEU	FIN	Nei	Average of Ratios	CEU	0.00443543	3.66381e-05	10858788
CEU	FIN	Nei	Ratio of Averages	CEU	0.00639683	6.57404e-05	10858788
CEU	FIN	WH	Average of Ratios	CEU	0.0127076	4.5163e-05	10858788
CEU	FIN	WH	Ratio of Averages	CEU	0.0067591	6.66214e-05	10858788
CEU	FIN	Population-specific (CEU)	Average of Ratios	CEU	-0.182329	0.000663389	10858788
CEU	FIN	Population-specific (CEU)	Ratio of Averages	CEU	-0.00255275	0.000307865	10858788
CEU	FIN	Population-specific (FIN)	Average of Ratios	CEU	0.190966	0.000659761	10858788
CEU	FIN	Population-specific (FIN)	Ratio of Averages	CEU	0.0152699	0.000308712	10858788
CEU	FIN	WC	Average of Ratios	FIN	0.00631231	3.77771e-05	10614356
CEU	FIN	WC	Ratio of Averages	FIN	0.00788051	6.56517e-05	10614356
CEU	FIN	Hudson	Average of Ratios	FIN	0.00503256	3.80139e-05	10614356
CEU	FIN	Hudson	Ratio of Averages	FIN	0.0064821	6.5775e-05	10614356
CEU	FIN	Nei	Average of Ratios	FIN	0.00516545	3.91684e-05	10614356
CEU	FIN	Nei	Ratio of Averages	FIN	0.00652146	6.6389e-05	10614356
CEU	FIN	WH	Average of Ratios	FIN	-0.00205241	4.6849e-05	10614356
CEU	FIN	WH	Ratio of Averages	FIN	0.00604865	6.71051e-05	10614356
CEU	FIN	Population-specific (CEU)	Average of Ratios	FIN	0.162673	0.000657549	10614356
CEU	FIN	Population-specific (CEU)	Ratio of Averages	FIN	0.0161262	0.000317034	10614356
CEU	FIN	Population-specific (FIN)	Average of Ratios	FIN	-0.152608	0.000653629	10614356
CEU	FIN	Population-specific (FIN)	Ratio of Averages	FIN	-0.00316198	0.000315853	10614356
CEU	FIN	WC	Average of Ratios	Both	0.00603432	4.4578e-05	8877481
CEU	FIN	WC	Ratio of Averages	Both	0.0077557	6.80644e-05	8877481
CEU	FIN	Hudson	Average of Ratios	Both	0.00462702	4.46924e-05	8877481
CEU	FIN	Hudson	Ratio of Averages	Both	0.00634898	6.81556e-05	8877481
CEU	FIN	Nei	Average of Ratios	Both	0.00476201	4.60241e-05	8877481
CEU	FIN	Nei	Ratio of Averages	Both	0.00638712	6.87827e-05	8877481
CEU	FIN	WH	Average of Ratios	Both	0.00488664	5.02838e-05	8877481
CEU	FIN	WH	Ratio of Averages	Both	0.00637442	6.97715e-05	8877481
CEU	FIN	Population-specific (CEU)	Average of Ratios	Both	-0.0011495	0.000520126	8877481
CEU	FIN	Population-specific (CEU)	Ratio of Averages	Both	0.00578293	0.000319062	8877481
CEU	FIN	Population-specific (FIN)	Average of Ratios	Both	0.0104035	0.00051966	8877481
CEU	FIN	Population-specific (FIN)	Ratio of Averages	Both	0.00691503	0.000320835	8877481
CEU	FIN	WC	Average of Ratios	Either	0.00610805	3.11786e-05	12595663
CEU	FIN	WC	Ratio of Averages	Either	0.00789555	6.30786e-05	12595663
CEU	FIN	Hudson	Average of Ratios	Either	0.00470318	3.13679e-05	12595663
CEU	FIN	Hudson	Ratio of Averages	Either	0.00649051	6.31729e-05	12595663
CEU	FIN	Nei	Average of Ratios	Either	0.00482043	3.23215e-05	12595663
CEU	FIN	Nei	Ratio of Averages	Either	0.00652996	6.37632e-05	12595663
CEU	FIN	WH	Average of Ratios	Either	0.0057816	4.08414e-05	12595663
CEU	FIN	WH	Ratio of Averages	Either	0.00643209	6.44966e-05	12595663
CEU	FIN	Population-specific (CEU)	Average of Ratios	Either	-0.0192917	0.000650549	12595663
CEU	FIN	Population-specific (CEU)	Ratio of Averages	Either	0.00779037	0.000305435	12595663
CEU	FIN	Population-specific (FIN)	Average of Ratios	Either	0.0286981	0.000645	12595663
CEU	FIN	Population-specific (FIN)	Ratio of Averages	Either	0.00519064	0.000304641	12595663
CEU	GBR	WC	Average of Ratios	YRI	0.00213903	2.59324e-05	7608962
CEU	GBR	WC	Ratio of Averages	YRI	0.00205628	3.30255e-05	7608962
CEU	GBR	Hudson	Average of Ratios	YRI	0.000700139	2.60997e-05	7608962
CEU	GBR	Hudson	Ratio of Averages	YRI	0.000611841	3.30809e-05	7608962
CEU	GBR	Nei	Average of Ratios	YRI	0.000744174	2.66673e-05	7608962
CEU	GBR	Nei	Ratio of Averages	YRI	0.000613792	3.31965e-05	7608962
CEU	GBR	WH	Average of Ratios	YRI	0.00055737	2.87644e-05	7608962
CEU	GBR	WH	Ratio of Averages	YRI	0.00056817	3.29182e-05	7608962
CEU	GBR	Population-specific (CEU)	Average of Ratios	YRI	0.00691059	0.000711484	7608962
CEU	GBR	Population-specific (CEU)	Ratio of Averages	YRI	0.00251154	0.000213593	7608962
CEU	GBR	Population-specific (GBR)	Average of Ratios	YRI	-0.00551032	0.000704217	7608962
CEU	GBR	Population-specific (GBR)	Ratio of Averages	YRI	-0.00128786	0.000206659	7608962
CEU	GBR	WC	Average of Ratios	CEU	0.00164156	1.98993e-05	10858788
CEU	GBR	WC	Ratio of Averages	CEU	0.00197704	3.4071e-05	10858788
CEU	GBR	Hudson	Average of Ratios	CEU	0.000149559	1.99379e-05	10858788
CEU	GBR	Hudson	Ratio of Averages	CEU	0.000530595	3.41201e-05	10858788
CEU	GBR	Nei	Average of Ratios	CEU	0.000181921	2.02842e-05	10858788
CEU	GBR	Nei	Ratio of Averages	CEU	0.000532265	3.42366e-05	10858788
CEU	GBR	WH	Average of Ratios	CEU	0.00359126	2.38928e-05	10858788
CEU	GBR	WH	Ratio of Averages	CEU	0.000643699	3.41939e-05	10858788
CEU	GBR	Population-specific (CEU)	Average of Ratios	CEU	-0.149564	0.000583537	10858788
CEU	GBR	Population-specific (CEU)	Ratio of Averages	CEU	-0.00438946	0.000222683	10858788
CEU	GBR	Population-specific (GBR)	Average of Ratios	CEU	0.149864	0.000583071	10858788
CEU	GBR	Population-specific (GBR)	Ratio of Averages	CEU	0.00545065	0.000218724	10858788
CEU	GBR	WC	Average of Ratios	GBR	0.00171438	2.11176e-05	11019700
CEU	GBR	WC	Ratio of Averages	GBR	0.00201365	3.42323e-05	11019700
CEU	GBR	Hudson	Average of Ratios	GBR	0.000322896	2.12494e-05	11019700
CEU	GBR	Hudson	Ratio of Averages	GBR	0.000571014	3.42945e-05	11019700
CEU	GBR	Nei	Average of Ratios	GBR	0.000358783	2.16873e-05	11019700
CEU	GBR	Nei	Ratio of Averages	GBR	0.000572823	3.44129e-05	11019700
CEU	GBR	WH	Average of Ratios	GBR	-0.00345428	2.33321e-05	11019700
CEU	GBR	WH	Ratio of Averages	GBR	0.000373945	3.41886e-05	11019700
CEU	GBR	Population-specific (CEU)	Average of Ratios	GBR	0.16463	0.00056397	11019700
CEU	GBR	Population-specific (CEU)	Ratio of Averages	GBR	0.00914348	0.000228422	11019700
CEU	GBR	Population-specific (GBR)	Average of Ratios	GBR	-0.163984	0.000558287	11019700
CEU	GBR	Population-specific (GBR)	Ratio of Averages	GBR	-0.00800146	0.000221963	11019700
CEU	GBR	WC	Average of Ratios	Both	0.00126926	2.39769e-05	9216875
CEU	GBR	WC	Ratio of Averages	Both	0.00194916	3.54256e-05	9216875
CEU	GBR	Hudson	Average of Ratios	Both	-0.000175175	2.40422e-05	9216875
CEU	GBR	Hudson	Ratio of Averages	Both	0.000504397	3.5482e-05	9216875
CEU	GBR	Nei	Average of Ratios	Both	-0.000140381	2.44633e-05	9216875
CEU	GBR	Nei	Ratio of Averages	Both	0.000505979	3.56022e-05	9216875
CEU	GBR	WH	Average of Ratios	Both	-0.000207503	2.51275e-05	9216875
CEU	GBR	WH	Ratio of Averages	Both	0.000474943	3.55093e-05	9216875
CEU	GBR	Population-specific (CEU)	Average of Ratios	Both	0.00123109	0.00039974	9216875
CEU	GBR	Population-specific (CEU)	Ratio of Averages	Both	0.00178565	0.000227702	9216875
CEU	GBR	Population-specific (GBR)	Average of Ratios	Both	-0.00158145	0.000396452	9216875
CEU	GBR	Population-specific (GBR)	Ratio of Averages	Both	-0.000776858	0.000223022	9216875
CEU	GBR	WC	Average of Ratios	Either	0.00197596	1.806e-05	12661613
CEU	GBR	WC	Ratio of Averages	Either	0.00204093	3.31022e-05	12661613
CEU	GBR	Hudson	Average of Ratios	Either	0.000536804	1.81636e-05	12661613
CEU	GBR	Hudson	Ratio of Averages	Either	0.000596608	3.31576e-05	12661613
CEU	GBR	Nei	Average of Ratios	Either	0.000570464	1.85403e-05	12661613
CEU	GBR	Nei	Ratio of Averages	Either	0.000598506	3.3273e-05	12661613
CEU	GBR	WH	Average of Ratios	Either	0.00022463	2.13249e-05	12661613
CEU	GBR	WH	Ratio of Averages	Either	0.000542089	3.30596e-05	12661613
CEU	GBR	Population-specific (CEU)	Average of Ratios	Either	0.0141164	0.000582256	12661613
CEU	GBR	Population-specific (CEU)	Ratio of Averages	Either	0.00296816	0.000222713	12661613
CEU	GBR	Population-specific (GBR)	Average of Ratios	Either	-0.0130428	0.000578287	12661613
CEU	GBR	Population-specific (GBR)	Ratio of Averages	Either	-0.00177494	0.000216492	12661613
CEU	IBS	WC	Average of Ratios	YRI	0.0117386	0.000122906	7417569
CEU	IBS	WC	Ratio of Averages	YRI	0.00979248	0.00012916	7417569
CEU	IBS	Hudson	Average of Ratios	YRI	0.00432848	9.23148e-05	7417569
CEU	IBS	Hudson	Ratio of Averages	YRI	0.00431916	0.000129353	7417569
CEU	IBS	Nei	Average of Ratios	YRI	0.00491604	9.84057e-05	7417569
CEU	IBS	Nei	Ratio of Averages	YRI	0.00437416	0.000131281	7417569
CEU	IBS	WH	Average of Ratios	YRI	-0.0634471	0.000734323	7417569
CEU	IBS	WH	Ratio of Averages	YRI	0.0101713	0.000318856	7417569
CEU	IBS	Population-specific (CEU)	Average of Ratios	YRI	-0.0901755	0.00102517	7417569
CEU	IBS	Population-specific (CEU)	Ratio of Averages	YRI	0.0124792	0.000428756	7417569
CEU	IBS	Population-specific (IBS)	Average of Ratios	YRI	0.0988324	0.00105109	7417569
CEU	IBS	Population-specific (IBS)	Ratio of Averages	YRI	-0.00384089	0.000440199	7417569
CEU	IBS	WC	Average of Ratios	CEU	0.00413347	7.75614e-05	10858788
CEU	IBS	WC	Ratio of Averages	CEU	0.00899146	0.000129702	10858788
CEU	IBS	Hudson	Average of Ratios	CEU	0.00363098	7.14729e-05	10858788
CEU	IBS	Hudson	Ratio of Averages	CEU	0.00394341	0.000132136	10858788
CEU	IBS	Nei	Average of Ratios	CEU	0.00405947	7.56283e-05	10858788
CEU	IBS	Nei	Ratio of Averages	CEU	0.00399249	0.00013404	10858788
CEU	IBS	WH	Average of Ratios	CEU	-0.208801	0.000638468	10858788
CEU	IBS	WH	Ratio of Averages	CEU	0.000414887	0.000319366	10858788
CEU	IBS	Population-specific (CEU)	Average of Ratios	CEU	-0.292577	0.000893234	10858788
CEU	IBS	Population-specific (CEU)	Ratio of Averages	CEU	-0.000976644	0.00043269	10858788
CEU	IBS	Population-specific (IBS)	Average of Ratios	CEU	0.299839	0.000921543	10858788
CEU	IBS	Population-specific (IBS)	Ratio of Averages	CEU	0.00886347	0.000463273	10858788
CEU	IBS	WC	Average of Ratios	IBS	0.0179663	0.000145936	7709984
CEU	IBS	WC	Ratio of Averages	IBS	0.00960959	0.000146305	7709984
CEU	IBS	Hudson	Average of Ratios	IBS	0.000241791	0.000100522	7709984
CEU	IBS	Hudson	Ratio of Averages	IBS	0.00316494	0.000142828	7709984
CEU	IBS	Nei	Average of Ratios	IBS	0.000729636	0.000107173	7709984
CEU	IBS	Nei	Ratio of Averages	IBS	0.00320413	0.000144823	7709984
CEU	IBS	WH	Average of Ratios	IBS	0.102641	0.000593474	7709984
CEU	IBS	WH	Ratio of Averages	IBS	0.0300649	0.000353846	7709984
CEU	IBS	Population-specific (CEU)	Average of Ratios	IBS	0.143024	0.000821004	7709984
CEU	IBS	Population-specific (CEU)	Ratio of Averages	IBS	0.0406733	0.000473393	7709984
CEU	IBS	Population-specific (IBS)	Average of Ratios	IBS	-0.14254	0.000817292	7709984
CEU	IBS	Population-specific (IBS)	Ratio of Averages	IBS	-0.0343434	0.000473013	7709984
CEU	IBS	WC	Average of Ratios	Both	0.00925112	0.000124743	7102586
CEU	IBS	WC	Ratio of Averages	Both	0.00893192	0.000145497	7102586
CEU	IBS	Hudson	Average of Ratios	Both	-0.000351997	0.000105847	7102586
CEU	IBS	Hudson	Ratio of Averages	Both	0.00289337	0.000144072	7102586
CEU	IBS	Nei	Average of Ratios	Both	0.000128645	0.000112208	7102586
CEU	IBS	Nei	Ratio of Averages	Both	0.00292853	0.000146031	7102586
CEU	IBS	WH	Average of Ratios	Both	0.0499136	0.000471646	7102586
CEU	IBS	WH	Ratio of Averages	Both	0.0211346	0.000336859	7102586
CEU	IBS	Population-specific (CEU)	Average of Ratios	Both	0.0697367	0.000652304	7102586
CEU	IBS	Population-specific (CEU)	Ratio of Averages	Both	0.0283283	0.000451093	7102586
CEU	IBS	Population-specific (IBS)	Average of Ratios	Both	-0.0704407	0.000666074	7102586
CEU	IBS	Population-specific (IBS)	Ratio of Averages	Both	-0.0225416	0.000464731	7102586
CEU	IBS	WC	Average of Ratios	Either	0.0102648	9.38168e-05	11466186
CEU	IBS	WC	Ratio of Averages	Either	0.00963442	0.000131979	11466186
CEU	IBS	Hudson	Average of Ratios	Either	0.00381926	7.01206e-05	11466186
CEU	IBS	Hudson	Ratio of Averages	Either	0.00419381	0.000132454	11466186
CEU	IBS	Nei	Average of Ratios	Either	0.00425535	7.45866e-05	11466186
CEU	IBS	Nei	Ratio of Averages	Either	0.00424693	0.000134409	11466186
CEU	IBS	WH	Average of Ratios	Either	-0.159642	0.000662739	11466186
CEU	IBS	WH	Ratio of Averages	Either	0.00932951	0.000333265	11466186
CEU	IBS	Population-specific (CEU)	Average of Ratios	Either	-0.224106	0.00092534	11466186
CEU	IBS	Population-specific (CEU)	Ratio of Averages	Either	0.0113549	0.000449611	11466186
CEU	IBS	Population-specific (IBS)	Average of Ratios	Either	0.231744	0.00094415	11466186
CEU	IBS	Population-specific (IBS)	Ratio of Averages	Either	-0.00296723	0.000465008	11466186
CEU	JPT	WC	Average of Ratios	YRI	0.075002	0.000309002	7763825
CEU	JPT	WC	Ratio of Averages	YRI	0.109334	0.000573947	7763825
CEU	JPT	Hudson	Average of Ratios	YRI	0.0734715	0.000308827	7763825
CEU	JPT	Hudson	Ratio of Averages	YRI	0.107959	0.000574118	7763825
CEU	JPT	Nei	Average of Ratios	YRI	0.0831858	0.000388642	7763825
CEU	JPT	Nei	Ratio of Averages	YRI	0.11443	0.000643142	7763825
CEU	JPT	WH	Average of Ratios	YRI	0.0759741	0.000311077	7763825
CEU	JPT	WH	Ratio of Averages	YRI	0.108675	0.000576473	7763825
CEU	JPT	Population-specific (CEU)	Average of Ratios	YRI	-0.03539	0.00122961	7763825
CEU	JPT	Population-specific (CEU)	Ratio of Averages	YRI	0.0768212	0.000908614	7763825
CEU	JPT	Population-specific (JPT)	Average of Ratios	YRI	0.182333	0.00125175	7763825
CEU	JPT	Population-specific (JPT)	Ratio of Averages	YRI	0.139097	0.00101671	7763825
CEU	JPT	WC	Average of Ratios	CEU	0.0587606	0.000260326	10858788
CEU	JPT	WC	Ratio of Averages	CEU	0.107031	0.000629675	10858788
CEU	JPT	Hudson	Average of Ratios	CEU	0.0570408	0.000260052	10858788
CEU	JPT	Hudson	Ratio of Averages	CEU	0.105561	0.000629325	10858788
CEU	JPT	Nei	Average of Ratios	CEU	0.0642497	0.000326503	10858788
CEU	JPT	Nei	Ratio of Averages	CEU	0.111747	0.00070321	10858788
CEU	JPT	WH	Average of Ratios	CEU	0.066513	0.000260383	10858788
CEU	JPT	WH	Ratio of Averages	CEU	0.10708	0.000632247	10858788
CEU	JPT	Population-specific (CEU)	Average of Ratios	CEU	-0.355004	0.00112304	10858788
CEU	JPT	Population-specific (CEU)	Ratio of Averages	CEU	0.039518	0.000992152	10858788
CEU	JPT	Population-specific (JPT)	Average of Ratios	CEU	0.469085	0.00110555	10858788
CEU	JPT	Population-specific (JPT)	Ratio of Averages	CEU	0.171605	0.00112755	10858788
CEU	JPT	WC	Average of Ratios	JPT	0.0589974	0.000283278	9807096
CEU	JPT	WC	Ratio of Averages	JPT	0.105747	0.000652626	9807096
CEU	JPT	Hudson	Average of Ratios	JPT	0.0578372	0.000283545	9807096
CEU	JPT	Hudson	Ratio of Averages	JPT	0.104534	0.00065383	9807096
CEU	JPT	Nei	Average of Ratios	JPT	0.0653261	0.000357043	9807096
CEU	JPT	Nei	Ratio of Averages	JPT	0.1106	0.000729796	9807096
CEU	JPT	WH	Average of Ratios	JPT	0.0499139	0.000287524	9807096
CEU	JPT	WH	Ratio of Averages	JPT	0.10382	0.00065586	9807096
CEU	JPT	Population-specific (CEU)	Average of Ratios	JPT	0.402497	0.00107287	9807096
CEU	JPT	Population-specific (CEU)	Ratio of Averages	JPT	0.135605	0.00101714	9807096
CEU	JPT	Population-specific (JPT)	Average of Ratios	JPT	-0.286823	0.00113849	9807096
CEU	JPT	Population-specific (JPT)	Ratio of Averages	JPT	0.0734637	0.00111058	9807096
CEU	JPT	WC	Average of Ratios	Both	0.0804814	0.000467568	6311759
CEU	JPT	WC	Ratio of Averages	Both	0.106265	0.000736968	6311759
CEU	JPT	Hudson	Average of Ratios	Both	0.0791107	0.000467649	6311759
CEU	JPT	Hudson	Ratio of Averages	Both	0.104953	0.000737627	6311759
CEU	JPT	Nei	Average of Ratios	Both	0.0900002	0.000590557	6311759
CEU	JPT	Nei	Ratio of Averages	Both	0.111067	0.000823692	6311759
CEU	JPT	WH	Average of Ratios	Both	0.0792831	0.000470904	6311759
CEU	JPT	WH	Ratio of Averages	Both	0.105106	0.000740434	6311759
CEU	JPT	Population-specific (CEU)	Average of Ratios	Both	0.0716105	0.00121251	6311759
CEU	JPT	Population-specific (CEU)	Ratio of Averages	Both	0.0982784	0.00108708	6311759
CEU	JPT	Population-specific (JPT)	Average of Ratios	Both	0.0866108	0.00129372	6311759
CEU	JPT	Population-specific (JPT)	Ratio of Averages	Both	0.111627	0.00122719	6311759
CEU	JPT	WC	Average of Ratios	Either	0.0493714	0.000190448	14354125
CEU	JPT	WC	Ratio of Averages	Either	0.106516	0.000571318	14354125
CEU	JPT	Hudson	Average of Ratios	Either	0.0478804	0.000190388	14354125
CEU	JPT	Hudson	Ratio of Averages	Either	0.105147	0.000571545	14354125
CEU	JPT	Nei	Average of Ratios	Either	0.0536622	0.000238163	14354125
CEU	JPT	Nei	Ratio of Averages	Either	0.111284	0.000638366	14354125
CEU	JPT	WH	Average of Ratios	Either	0.0495569	0.000192008	14354125
CEU	JPT	WH	Ratio of Averages	Either	0.105801	0.000573777	14354125
CEU	JPT	Population-specific (CEU)	Average of Ratios	Either	-0.02505	0.000922126	14354125
CEU	JPT	Population-specific (CEU)	Ratio of Averages	Either	0.0766967	0.000939847	14354125
CEU	JPT	Population-specific (JPT)	Average of Ratios	Either	0.120811	0.000930812	14354125
CEU	JPT	Population-specific (JPT)	Ratio of Averages	Either	0.133596	0.00103715	14354125
CEU	LWK	WC	Average of Ratios	YRI	0.0671389	0.000163136	15447952
CEU	LWK	WC	Ratio of Averages	YRI	0.130173	0.00047224	15447952
CEU	LWK	Hudson	Average of Ratios	YRI	0.0675956	0.00016635	15447952
CEU	LWK	Hudson	Ratio of Averages	YRI	0.130386	0.000480592	15447952
CEU	LWK	Nei	Average of Ratios	YRI	0.076425	0.000214947	15447952
CEU	LWK	Nei	Ratio of Averages	YRI	0.139834	0.000551242	15447952
CEU	LWK	WH	Average of Ratios	YRI	0.0329102	0.000163419	15447952
CEU	LWK	WH	Ratio of Averages	YRI	0.120192	0.000461308	15447952
CEU	LWK	Population-specific (CEU)	Average of Ratios	YRI	0.593657	0.000764536	15447952
CEU	LWK	Population-specific (CEU)	Ratio of Averages	YRI	0.284999	0.00100674	15447952
CEU	LWK	Population-specific (LWK)	Average of Ratios	YRI	-0.458466	0.000698659	15447952
CEU	LWK	Population-specific (LWK)	Ratio of Averages	YRI	-0.024227	0.000632325	15447952
CEU	LWK	WC	Average of Ratios	CEU	0.0715913	0.000233645	10858788
CEU	LWK	WC	Ratio of Averages	CEU	0.132462	0.00058574	10858788
CEU	LWK	Hudson	Average of Ratios	CEU	0.0698256	0.00023656	10858788
CEU	LWK	Hudson	Ratio of Averages	CEU	0.131092	0.000588848	10858788
CEU	LWK	Nei	Average of Ratios	CEU	0.080463	0.000311379	10858788
CEU	LWK	Nei	Ratio of Averages	CEU	0.140649	0.000675947	10858788
CEU	LWK	WH	Average of Ratios	CEU	0.0885952	0.000224248	10858788
CEU	LWK	WH	Ratio of Averages	CEU	0.132257	0.000569209	10858788
CEU	LWK	Population-specific (CEU)	Average of Ratios	CEU	-0.214847	0.000985619	10858788
CEU	LWK	Population-specific (CEU)	Ratio of Averages	CEU	0.113427	0.00111101	10858788
CEU	LWK	Population-specific (LWK)	Average of Ratios	CEU	0.354498	0.000834706	10858788
CEU	LWK	Population-specific (LWK)	Ratio of Averages	CEU	0.148757	0.000690888	10858788
CEU	LWK	WC	Average of Ratios	LWK	0.0553588	0.000128653	19631988
CEU	LWK	WC	Ratio of Averages	LWK	0.128729	0.000450902	19631988
CEU	LWK	Hudson	Average of Ratios	LWK	0.0555867	0.00013107	19631988
CEU	LWK	Hudson	Ratio of Averages	LWK	0.128958	0.000458913	19631988
CEU	LWK	Nei	Average of Ratios	LWK	0.0627199	0.00016883	19631988
CEU	LWK	Nei	Ratio of Averages	LWK	0.138197	0.000525575	19631988
CEU	LWK	WH	Average of Ratios	LWK	0.0156581	0.000132699	19631988
CEU	LWK	WH	Ratio of Averages	LWK	0.118525	0.000440901	19631988
CEU	LWK	Population-specific (CEU)	Average of Ratios	LWK	0.661171	0.000643959	19631988
CEU	LWK	Population-specific (CEU)	Ratio of Averages	LWK	0.287183	0.000969109	19631988
CEU	LWK	Population-specific (LWK)	Average of Ratios	LWK	-0.549997	0.000614602	19631988
CEU	LWK	Population-specific (LWK)	Ratio of Averages	LWK	-0.0292673	0.000622756	19631988
CEU	LWK	WC	Average of Ratios	Both	0.0942519	0.000366773	7532030
CEU	LWK	WC	Ratio of Averages	Both	0.134043	0.000658015	7532030
CEU	LWK	Hudson	Average of Ratios	Both	0.0931222	0.000371359	7532030
CEU	LWK	Hudson	Ratio of Averages	Both	0.132961	0.000662828	7532030
CEU	LWK	Nei	Average of Ratios	Both	0.108036	0.000491545	7532030
CEU	LWK	Nei	Ratio of Averages	Both	0.142795	0.000762382	7532030
CEU	LWK	WH	Average of Ratios	Both	0.0915576	0.000350504	7532030
CEU	LWK	WH	Ratio of Averages	Both	0.132121	0.000640797	7532030
CEU	LWK	Population-specific (CEU)	Average of Ratios	Both	0.116852	0.00114087	7532030
CEU	LWK	Population-specific (CEU)	Ratio of Averages	Both	0.145704	0.00122331	7532030
CEU	LWK	Population-specific (LWK)	Average of Ratios	Both	0.0693923	0.000853936	7532030
CEU	LWK	Population-specific (LWK)	Ratio of Averages	Both	0.120217	0.000740556	7532030
CEU	LWK	WC	Average of Ratios	Either	0.0502767	0.000107526	22958746
CEU	LWK	WC	Ratio of Averages	Either	0.12755	0.00042177	22958746
CEU	LWK	Hudson	Average of Ratios	Either	0.050007	0.000109589	22958746
CEU	LWK	Hudson	Ratio of Averages	Either	0.127499	0.000428486	22958746
CEU	LWK	Nei	Average of Ratios	Either	0.0562453	0.000140543	22958746
CEU	LWK	Nei	Ratio of Averages	Either	0.136528	0.000489969	22958746
CEU	LWK	WH	Average of Ratios	Either	0.0252549	0.000108066	22958746
CEU	LWK	WH	Ratio of Averages	Either	0.11901	0.000411248	22958746
CEU	LWK	Population-specific (CEU)	Average of Ratios	Either	0.425414	0.000594609	22958746
CEU	LWK	Population-specific (CEU)	Ratio of Averages	Either	0.256255	0.000916037	22958746
CEU	LWK	Population-specific (LWK)	Average of Ratios	Either	-0.3254	0.000549429	22958746
CEU	LWK	Population-specific (LWK)	Ratio of Averages	Either	-0.0012568	0.000588314	22958746
CEU	MXL	WC	Average of Ratios	YRI	0.0248459	0.000118729	9291677
CEU	MXL	WC	Ratio of Averages	YRI	0.038776	0.000226682	9291677
CEU	MXL	Hudson	Average of Ratios	YRI	0.0223586	0.000115963	9291677
CEU	MXL	Hudson	Ratio of Averages	YRI	0.0370515	0.000226053	9291677
CEU	MXL	Nei	Average of Ratios	YRI	0.0237438	0.000128409	9291677
CEU	MXL	Nei	Ratio of Averages	YRI	0.0378762	0.000235432	9291677
CEU	MXL	WH	Average of Ratios	YRI	0.0455258	0.000171726	9291677
CEU	MXL	WH	Ratio of Averages	YRI	0.0389341	0.000245022	9291677
CEU	MXL	Population-specific (CEU)	Average of Ratios	YRI	0.206477	0.00102291	9291677
CEU	MXL	Population-specific (CEU)	Ratio of Averages	YRI	0.0520128	0.000575656	9291677
CEU	MXL	Population-specific (MXL)	Average of Ratios	YRI	-0.16176	0.00102567	9291677
CEU	MXL	Population-specific (MXL)	Ratio of Averages	YRI	0.0220903	0.000499593	9291677
CEU	MXL	WC	Average of Ratios	CEU	0.021405	0.000116904	10858788
CEU	MXL	WC	Ratio of Averages	CEU	0.037685	0.000246085	10858788
CEU	MXL	Hudson	Average of Ratios	CEU	0.0199928	0.000114424	10858788
CEU	MXL	Hudson	Ratio of Averages	CEU	0.0361487	0.000246422	10858788
CEU	MXL	Nei	Average of Ratios	CEU	0.0212148	0.000126668	10858788
CEU	MXL	Nei	Ratio of Averages	CEU	0.0369358	0.000256407	10858788
CEU	MXL	WH	Average of Ratios	CEU	-0.00911934	0.000159925	10858788
CEU	MXL	WH	Ratio of Averages	CEU	0.0342195	0.000265262	10858788
CEU	MXL	Population-specific (CEU)	Average of Ratios	CEU	-0.211372	0.000791815	10858788
CEU	MXL	Population-specific (CEU)	Ratio of Averages	CEU	0.0208166	0.000610288	10858788
CEU	MXL	Population-specific (MXL)	Average of Ratios	CEU	0.251357	0.000759418	10858788
CEU	MXL	Population-specific (MXL)	Ratio of Averages	CEU	0.0514808	0.000535642	10858788
CEU	MXL	WC	Average of Ratios	MXL	0.0224171	0.000106005	12338622
CEU	MXL	WC	Ratio of Averages	MXL	0.0386636	0.000240036	12338622
CEU	MXL	Hudson	Average of Ratios	MXL	0.0195948	0.000103239	12338622
CEU	MXL	Hudson	Ratio of Averages	MXL	0.0368722	0.000239051	12338622
CEU	MXL	Nei	Average of Ratios	MXL	0.0208036	0.000114475	12338622
CEU	MXL	Nei	Ratio of Averages	MXL	0.0376896	0.000248925	12338622
CEU	MXL	WH	Average of Ratios	MXL	0.0572853	0.00014964	12338622
CEU	MXL	WH	Ratio of Averages	MXL	0.0400861	0.000259571	12338622
CEU	MXL	Population-specific (CEU)	Average of Ratios	MXL	0.319135	0.000890633	12338622
CEU	MXL	Population-specific (CEU)	Ratio of Averages	MXL	0.0624144	0.000619577	12338622
CEU	MXL	Population-specific (MXL)	Average of Ratios	MXL	-0.279945	0.000897305	12338622
CEU	MXL	Population-specific (MXL)	Ratio of Averages	MXL	0.0113299	0.000540267	12338622
CEU	MXL	WC	Average of Ratios	Both	0.0261351	0.000156252	8470326
CEU	MXL	WC	Ratio of Averages	Both	0.0380307	0.000261664	8470326
CEU	MXL	Hudson	Average of Ratios	Both	0.0242237	0.000153044	8470326
CEU	MXL	Hudson	Ratio of Averages	Both	0.0364208	0.000261677	8470326
CEU	MXL	Nei	Average of Ratios	Both	0.0257683	0.000169572	8470326
CEU	MXL	Nei	Ratio of Averages	Both	0.0372192	0.000272357	8470326
CEU	MXL	WH	Average of Ratios	Both	0.0222064	0.000184888	8470326
CEU	MXL	WH	Ratio of Averages	Both	0.0359997	0.000280524	8470326
CEU	MXL	Population-specific (CEU)	Average of Ratios	Both	0.00819207	0.000740026	8470326
CEU	MXL	Population-specific (CEU)	Ratio of Averages	Both	0.0330741	0.000638869	8470326
CEU	MXL	Population-specific (MXL)	Average of Ratios	Both	0.0402552	0.000709139	8470326
CEU	MXL	Population-specific (MXL)	Ratio of Averages	Both	0.0397674	0.000565811	8470326
CEU	MXL	WC	Average of Ratios	Either	0.0195324	8.54648e-05	14727084
CEU	MXL	WC	Ratio of Averages	Either	0.0383186	0.000226655	14727084
CEU	MXL	Hudson	Average of Ratios	Either	0.0172259	8.31608e-05	14727084
CEU	MXL	Hudson	Ratio of Averages	Either	0.0366029	0.00022603	14727084
CEU	MXL	Nei	Average of Ratios	Either	0.0182514	9.212e-05	14727084
CEU	MXL	Nei	Ratio of Averages	Either	0.037409	0.000235301	14727084
CEU	MXL	WH	Average of Ratios	Either	0.0284986	0.000133989	14727084
CEU	MXL	WH	Ratio of Averages	Either	0.038311	0.000246184	14727084
CEU	MXL	Population-specific (CEU)	Average of Ratios	Either	0.106814	0.000827548	14727084
CEU	MXL	Population-specific (CEU)	Ratio of Averages	Either	0.0501773	0.000590082	14727084
CEU	MXL	Population-specific (MXL)	Average of Ratios	Either	-0.0723617	0.000824202	14727084
CEU	MXL	Population-specific (MXL)	Ratio of Averages	Either	0.0230285	0.000510574	14727084
CEU	PUR	WC	Average of Ratios	YRI	0.0131412	5.36622e-05	10554024
CEU	PUR	WC	Ratio of Averages	YRI	0.0128343	8.87395e-05	10554024
CEU	PUR	Hudson	Average of Ratios	YRI	0.00890315	4.84924e-05	10554024
CEU	PUR	Hudson	Ratio of Averages	YRI	0.0106806	8.71264e-05	10554024
CEU	PUR	Nei	Average of Ratios	YRI	0.00919609	5.07064e-05	10554024
CEU	PUR	Nei	Ratio of Averages	YRI	0.0107785	8.83967e-05	10554024
CEU	PUR	WH	Average of Ratios	YRI	0.0794215	0.000210626	10554024
CEU	PUR	WH	Ratio of Averages	YRI	0.0218811	0.000139275	10554024
CEU	PUR	Population-specific (CEU)	Average of Ratios	YRI	0.337989	0.000910778	10554024
CEU	PUR	Population-specific (CEU)	Ratio of Averages	YRI	0.0629495	0.00041855	10554024
CEU	PUR	Population-specific (PUR)	Average of Ratios	YRI	-0.320182	0.000884109	10554024
CEU	PUR	Population-specific (PUR)	Ratio of Averages	YRI	-0.0415883	0.000355459	10554024
CEU	PUR	WC	Average of Ratios	CEU	0.00844727	5.4335e-05	10858788
CEU	PUR	WC	Ratio of Averages	CEU	0.0120494	9.51759e-05	10858788
CEU	PUR	Hudson	Average of Ratios	CEU	0.00684502	5.14538e-05	10858788
CEU	PUR	Hudson	Ratio of Averages	CEU	0.0101341	9.4455e-05	10858788
CEU	PUR	Nei	Average of Ratios	CEU	0.00709781	5.38584e-05	10858788
CEU	PUR	Nei	Ratio of Averages	CEU	0.0102239	9.57761e-05	10858788
CEU	PUR	WH	Average of Ratios	CEU	-0.0278081	0.000162746	10858788
CEU	PUR	WH	Ratio of Averages	CEU	0.012139	0.00014214	10858788
CEU	PUR	Population-specific (CEU)	Average of Ratios	CEU	-0.154869	0.000679856	10858788
CEU	PUR	Population-specific (CEU)	Ratio of Averages	CEU	0.0194902	0.000405485	10858788
CEU	PUR	Population-specific (PUR)	Average of Ratios	CEU	0.168559	0.00065551	10858788
CEU	PUR	Population-specific (PUR)	Ratio of Averages	CEU	0.000777957	0.000339438	10858788
CEU	PUR	WC	Average of Ratios	PUR	0.0120306	4.77934e-05	13501139
CEU	PUR	WC	Ratio of Averages	PUR	0.0126429	8.98269e-05	13501139
CEU	PUR	Hudson	Average of Ratios	PUR	0.00764194	4.32433e-05	13501139
CEU	PUR	Hudson	Ratio of Averages	PUR	0.0104691	8.81099e-05	13501139
CEU	PUR	Nei	Average of Ratios	PUR	0.00789627	4.5195e-05	13501139
CEU	PUR	Nei	Ratio of Averages	PUR	0.010564	8.93759e-05	13501139
CEU	PUR	WH	Average of Ratios	PUR	0.0903943	0.000186549	13501139
CEU	PUR	WH	Ratio of Averages	PUR	0.0225151	0.000143404	13501139
CEU	PUR	Population-specific (CEU)	Average of Ratios	PUR	0.393819	0.000808484	13501139
CEU	PUR	Population-specific (CEU)	Ratio of Averages	PUR	0.0666836	0.000439805	13501139
CEU	PUR	Population-specific (PUR)	Average of Ratios	PUR	-0.378536	0.000786122	13501139
CEU	PUR	Population-specific (PUR)	Ratio of Averages	PUR	-0.0457454	0.00037767	13501139
CEU	PUR	WC	Average of Ratios	Both	0.0098475	7.05499e-05	8670932
CEU	PUR	WC	Ratio of Averages	Both	0.0120828	0.000100261	8670932
CEU	PUR	Hudson	Average of Ratios	Both	0.00745592	6.68085e-05	8670932
CEU	PUR	Hudson	Ratio of Averages	Both	0.0101098	9.92678e-05	8670932
CEU	PUR	Nei	Average of Ratios	Both	0.00775606	6.99345e-05	8670932
CEU	PUR	Nei	Ratio of Averages	Both	0.0101993	0.000100655	8670932
CEU	PUR	WH	Average of Ratios	Both	0.0178887	0.000161953	8670932
CEU	PUR	WH	Ratio of Averages	Both	0.0144055	0.000150027	8670932
CEU	PUR	Population-specific (CEU)	Average of Ratios	Both	0.0561421	0.000622293	8670932
CEU	PUR	Population-specific (CEU)	Ratio of Averages	Both	0.0301567	0.000430057	8670932
CEU	PUR	Population-specific (PUR)	Average of Ratios	Both	-0.0412303	0.000580943	8670932
CEU	PUR	Population-specific (PUR)	Ratio of Averages	Both	-0.00993719	0.000360753	8670932
CEU	PUR	WC	Average of Ratios	Either	0.0107571	4.0035e-05	15688995
CEU	PUR	WC	Ratio of Averages	Either	0.0126035	8.61911e-05	15688995
CEU	PUR	Hudson	Average of Ratios	Either	0.00719317	3.61897e-05	15688995
CEU	PUR	Hudson	Ratio of Averages	Either	0.0104889	8.4762e-05	15688995
CEU	PUR	Nei	Average of Ratios	Either	0.00742112	3.78243e-05	15688995
CEU	PUR	Nei	Ratio of Averages	Either	0.010584	8.59808e-05	15688995
CEU	PUR	WH	Average of Ratios	Either	0.0486553	0.00017172	15688995
CEU	PUR	WH	Ratio of Averages	Either	0.0202502	0.000136064	15688995
CEU	PUR	Population-specific (CEU)	Average of Ratios	Either	0.200683	0.000749197	15688995
CEU	PUR	Population-specific (CEU)	Ratio of Averages	Either	0.0560417	0.000412602	15688995
CEU	PUR	Population-specific (PUR)	Average of Ratios	Either	-0.186297	0.000729398	15688995
CEU	PUR	Population-specific (PUR)	Ratio of Averages	Either	-0.0350639	0.000352997	15688995
CEU	TSI	WC	Average of Ratios	YRI	0.00414095	3.59488e-05	7903023
CEU	TSI	WC	Ratio of Averages	YRI	0.00503397	5.76414e-05	7903023
CEU	TSI	Hudson	Average of Ratios	YRI	0.00281657	3.61706e-05	7903023
CEU	TSI	Hudson	Ratio of Averages	YRI	0.00366377	5.7775e-05	7903023
CEU	TSI	Nei	Average of Ratios	YRI	0.00289661	3.75613e-05	7903023
CEU	TSI	Nei	Ratio of Averages	YRI	0.00368058	5.81462e-05	7903023
CEU	TSI	WH	Average of Ratios	YRI	-0.0011892	6.38571e-05	7903023
CEU	TSI	WH	Ratio of Averages	YRI	0.0033019	5.80852e-05	7903023
CEU	TSI	Population-specific (CEU)	Average of Ratios	YRI	0.0592055	0.000792215	7903023
CEU	TSI	Population-specific (CEU)	Ratio of Averages	YRI	0.00875778	0.000257105	7903023
CEU	TSI	Population-specific (TSI)	Average of Ratios	YRI	-0.0535724	0.000785699	7903023
CEU	TSI	Population-specific (TSI)	Ratio of Averages	YRI	-0.00143024	0.000242325	7903023
CEU	TSI	WC	Average of Ratios	CEU	0.00368609	3.28324e-05	10858788
CEU	TSI	WC	Ratio of Averages	CEU	0.00500638	6.57136e-05	10858788
CEU	TSI	Hudson	Average of Ratios	CEU	0.00215068	3.30347e-05	10858788
CEU	TSI	Hudson	Ratio of Averages	CEU	0.00362556	6.58322e-05	10858788
CEU	TSI	Nei	Average of Ratios	CEU	0.00221904	3.45809e-05	10858788
CEU	TSI	Nei	Ratio of Averages	CEU	0.00364213	6.62526e-05	10858788
CEU	TSI	WH	Average of Ratios	CEU	0.0131979	4.98441e-05	10858788
CEU	TSI	WH	Ratio of Averages	CEU	0.00398635	6.50215e-05	10858788
CEU	TSI	Population-specific (CEU)	Average of Ratios	CEU	-0.15336	0.000602654	10858788
CEU	TSI	Population-specific (CEU)	Ratio of Averages	CEU	-0.00145333	0.000285982	10858788
CEU	TSI	Population-specific (TSI)	Average of Ratios	CEU	0.157661	0.00059311	10858788
CEU	TSI	Population-specific (TSI)	Ratio of Averages	CEU	0.00870444	0.000262151	10858788
CEU	TSI	WC	Average of Ratios	TSI	0.00337371	2.97579e-05	11633602
CEU	TSI	WC	Ratio of Averages	TSI	0.00499538	6.26293e-05	11633602
CEU	TSI	Hudson	Average of Ratios	TSI	0.00218092	2.99639e-05	11633602
CEU	TSI	Hudson	Ratio of Averages	TSI	0.00363046	6.28073e-05	11633602
CEU	TSI	Nei	Average of Ratios	TSI	0.0022459	3.12323e-05	11633602
CEU	TSI	Nei	Ratio of Averages	TSI	0.00364705	6.32086e-05	11633602
CEU	TSI	WH	Average of Ratios	TSI	-0.0126532	5.32962e-05	11633602
CEU	TSI	WH	Ratio of Averages	TSI	0.00290266	6.24751e-05	11633602
CEU	TSI	Population-specific (CEU)	Average of Ratios	TSI	0.210999	0.000658514	11633602
CEU	TSI	Population-specific (CEU)	Ratio of Averages	TSI	0.0138756	0.000282569	11633602
CEU	TSI	Population-specific (TSI)	Average of Ratios	TSI	-0.206637	0.000653683	11633602
CEU	TSI	Population-specific (TSI)	Ratio of Averages	TSI	-0.0066147	0.000262074	11633602
CEU	TSI	WC	Average of Ratios	Both	0.00350337	4.00038e-05	9182351
CEU	TSI	WC	Ratio of Averages	Both	0.00498508	6.80454e-05	9182351
CEU	TSI	Hudson	Average of Ratios	Both	0.00212368	4.02584e-05	9182351
CEU	TSI	Hudson	Ratio of Averages	Both	0.00361105	6.82018e-05	9182351
CEU	TSI	Nei	Average of Ratios	Both	0.00220014	4.20889e-05	9182351
CEU	TSI	Nei	Ratio of Averages	Both	0.00362753	6.86363e-05	9182351
CEU	TSI	WH	Average of Ratios	Both	0.00224803	4.73035e-05	9182351
CEU	TSI	WH	Ratio of Averages	Both	0.00350525	6.71865e-05	9182351
CEU	TSI	Population-specific (CEU)	Average of Ratios	Both	0.00037318	0.000460991	9182351
CEU	TSI	Population-specific (CEU)	Ratio of Averages	Both	0.00510045	0.000294685	9182351
CEU	TSI	Population-specific (TSI)	Average of Ratios	Both	0.00387418	0.000448054	9182351
CEU	TSI	Population-specific (TSI)	Ratio of Averages	Both	0.00212166	0.00026893	9182351
CEU	TSI	WC	Average of Ratios	Either	0.00353911	2.52778e-05	13310039
CEU	TSI	WC	Ratio of Averages	Either	0.00501642	5.98454e-05	13310039
CEU	TSI	Hudson	Average of Ratios	Either	0.00219573	2.54556e-05	13310039
CEU	TSI	Hudson	Ratio of Averages	Either	0.00364471	5.99899e-05	13310039
CEU	TSI	Nei	Average of Ratios	Either	0.00225556	2.64904e-05	13310039
CEU	TSI	Nei	Ratio of Averages	Either	0.0036614	6.03741e-05	13310039
CEU	TSI	WH	Average of Ratios	Either	-0.00184304	4.84918e-05	13310039
CEU	TSI	WH	Ratio of Averages	Either	0.00338349	5.9568e-05	13310039
CEU	TSI	Population-specific (CEU)	Average of Ratios	Either	0.0590492	0.000629656	13310039
CEU	TSI	Population-specific (CEU)	Ratio of Averages	Either	0.00732189	0.000272323	13310039
CEU	TSI	Population-specific (TSI)	Average of Ratios	Either	-0.0546578	0.000623489	13310039
CEU	TSI	Population-specific (TSI)	Ratio of Averages	Either	-3.24715e-05	0.00025194	13310039
CEU	YRI	WC	Average of Ratios	YRI	0.0639415	0.000152536	17814120
CEU	YRI	WC	Ratio of Averages	YRI	0.139369	0.000497789	17814120
CEU	YRI	Hudson	Average of Ratios	YRI	0.0630503	0.000153455	17814120
CEU	YRI	Hudson	Ratio of Averages	YRI	0.138538	0.000500688	17814120
CEU	YRI	Nei	Average of Ratios	YRI	0.0717859	0.000200498	17814120
CEU	YRI	Nei	Ratio of Averages	YRI	0.149247	0.000579404	17814120
CEU	YRI	WH	Average of Ratios	YRI	0.052832	0.000152491	17814120
CEU	YRI	WH	Ratio of Averages	YRI	0.135702	0.000495623	17814120
CEU	YRI	Population-specific (CEU)	Average of Ratios	YRI	0.652305	0.000692319	17814120
CEU	YRI	Population-specific (CEU)	Ratio of Averages	YRI	0.302086	0.00101315	17814120
CEU	YRI	Population-specific (YRI)	Average of Ratios	YRI	-0.526204	0.000655999	17814120
CEU	YRI	Population-specific (YRI)	Ratio of Averages	YRI	-0.0250095	0.000654172	17814120
CEU	YRI	WC	Average of Ratios	CEU	0.0760395	0.000246181	10858788
CEU	YRI	WC	Ratio of Averages	CEU	0.142546	0.000623283	10858788
CEU	YRI	Hudson	Average of Ratios	CEU	0.0745409	0.000247199	10858788
CEU	YRI	Hudson	Ratio of Averages	CEU	0.141227	0.000624709	10858788
CEU	YRI	Nei	Average of Ratios	CEU	0.0866655	0.000330522	10858788
CEU	YRI	Nei	Ratio of Averages	CEU	0.152364	0.000725016	10858788
CEU	YRI	WH	Average of Ratios	CEU	0.0799077	0.000242833	10858788
CEU	YRI	WH	Ratio of Averages	CEU	0.141695	0.000619479	10858788
CEU	YRI	Population-specific (CEU)	Average of Ratios	CEU	-0.23494	0.00099993	10858788
CEU	YRI	Population-specific (CEU)	Ratio of Averages	CEU	0.114239	0.00114085	10858788
CEU	YRI	Population-specific (YRI)	Average of Ratios	CEU	0.384022	0.000851651	10858788
CEU	YRI	Population-specific (YRI)	Ratio of Averages	CEU	0.168214	0.00072995	10858788
CEU	YRI	WC	Average of Ratios	YRI	0.0639415	0.000152536	17814120
CEU	YRI	WC	Ratio of Averages	YRI	0.139369	0.000497789	17814120
CEU	YRI	Hudson	Average of Ratios	YRI	0.0630503	0.000153455	17814120
CEU	YRI	Hudson	Ratio of Averages	YRI	0.138538	0.000500688	17814120
CEU	YRI	Nei	Average of Ratios	YRI	0.0717859	0.000200498	17814120
CEU	YRI	Nei	Ratio of Averages	YRI	0.149247	0.000579404	17814120
CEU	YRI	WH	Average of Ratios	YRI	0.052832	0.000152491	17814120
CEU	YRI	WH	Ratio of Averages	YRI	0.135702	0.000495623	17814120
CEU	YRI	Population-specific (CEU)	Average of Ratios	YRI	0.652305	0.000692319	17814120
CEU	YRI	Population-specific (CEU)	Ratio of Averages	YRI	0.302086	0.00101315	17814120
CEU	YRI	Population-specific (YRI)	Average of Ratios	YRI	-0.526204	0.000655999	17814120
CEU	YRI	Population-specific (YRI)	Ratio of Averages	YRI	-0.0250095	0.000654172	17814120
CEU	YRI	WC	Average of Ratios	Both	0.101654	0.000403718	7160258
CEU	YRI	WC	Ratio of Averages	Both	0.143355	0.000708503	7160258
CEU	YRI	Hudson	Average of Ratios	Both	0.100406	0.000405491	7160258
CEU	YRI	Hudson	Ratio of Averages	Both	0.142149	0.000710666	7160258
CEU	YRI	Nei	Average of Ratios	Both	0.117669	0.00054505	7160258
CEU	YRI	Nei	Ratio of Averages	Both	0.153435	0.000825587	7160258
CEU	YRI	WH	Average of Ratios	Both	0.0998063	0.000399149	7160258
CEU	YRI	WH	Ratio of Averages	Both	0.14188	0.00070459	7160258
CEU	YRI	Population-specific (CEU)	Average of Ratios	Both	0.134964	0.00116884	7160258
CEU	YRI	Population-specific (CEU)	Ratio of Averages	Both	0.157662	0.00126218	7160258
CEU	YRI	Population-specific (YRI)	Average of Ratios	Both	0.0658473	0.000864113	7160258
CEU	YRI	Population-specific (YRI)	Ratio of Averages	Both	0.126636	0.000762382	7160258
CEU	YRI	WC	Average of Ratios	Either	0.0574959	0.000123897	21512650
CEU	YRI	WC	Ratio of Averages	Either	0.138851	0.000461632	21512650
CEU	YRI	Hudson	Average of Ratios	Either	0.056417	0.000124641	21512650
CEU	YRI	Hudson	Ratio of Averages	Either	0.137911	0.000464003	21512650
CEU	YRI	Nei	Average of Ratios	Either	0.064025	0.000162402	21512650
CEU	YRI	Nei	Ratio of Averages	Either	0.148522	0.000536593	21512650
CEU	YRI	WH	Average of Ratios	Either	0.0508639	0.000122805	21512650
CEU	YRI	WH	Ratio of Averages	Either	0.135793	0.000459211	21512650
CEU	YRI	Population-specific (CEU)	Average of Ratios	Either	0.376648	0.000650449	21512650
CEU	YRI	Population-specific (CEU)	Ratio of Averages	Either	0.260068	0.000951585	21512650
CEU	YRI	Population-specific (YRI)	Average of Ratios	Either	-0.263814	0.000598075	21512650
CEU	YRI	Population-specific (YRI)	Ratio of Averages	Either	0.0157544	0.000616817	21512650
CEU14	CHB14	WC	Average of Ratios	YRI	0.0827508	0.000406486	6697522
CEU14	CHB14	WC	Ratio of Averages	YRI	0.11428	0.000688794	6697522
CEU14	CHB14	Hudson	Average of Ratios	YRI	0.0741784	0.000410285	6697522
CEU14	CHB14	Hudson	Ratio of Averages	YRI	0.106003	0.000695232	6697522
CEU14	CHB14	Nei	Average of Ratios	YRI	0.0885539	0.000530687	6697522
CEU14	CHB14	Nei	Ratio of Averages	YRI	0.113855	0.000787717	6697522
CEU14	CHB14	WH	Average of Ratios	YRI	0.0741784	0.000410285	6697522
CEU14	CHB14	WH	Ratio of Averages	YRI	0.106003	0.000695232	6697522
CEU14	CHB14	Population-specific (CEU14)	Average of Ratios	YRI	-0.00134993	0.00143275	6697522
CEU14	CHB14	Population-specific (CEU14)	Ratio of Averages	YRI	0.0760733	0.0010752	6697522
CEU14	CHB14	Population-specific (CHB14)	Average of Ratios	YRI	0.149707	0.00146792	6697522
CEU14	CHB14	Population-specific (CHB14)	Ratio of Averages	YRI	0.135932	0.00116922	6697522
CEU14	CHB14	WC	Average of Ratios	CEU14	0.0720203	0.000433162	7454856
CEU14	CHB14	WC	Ratio of Averages	CEU14	0.107904	0.000797534	7454856
CEU14	CHB14	Hudson	Average of Ratios	CEU14	0.0633476	0.000437211	7454856
CEU14	CHB14	Hudson	Ratio of Averages	CEU14	0.0995663	0.000804988	7454856
CEU14	CHB14	Nei	Average of Ratios	CEU14	0.0754356	0.000562157	7454856
CEU14	CHB14	Nei	Ratio of Averages	CEU14	0.106586	0.000906021	7454856
CEU14	CHB14	WH	Average of Ratios	CEU14	0.0633476	0.000437211	7454856
CEU14	CHB14	WH	Ratio of Averages	CEU14	0.0995663	0.000804988	7454856
CEU14	CHB14	Population-specific (CEU14)	Average of Ratios	CEU14	-0.245616	0.00133845	7454856
CEU14	CHB14	Population-specific (CEU14)	Ratio of Averages	CEU14	0.00593747	0.00116126	7454856
CEU14	CHB14	Population-specific (CHB14)	Average of Ratios	CEU14	0.372311	0.00142712	7454856
CEU14	CHB14	Population-specific (CHB14)	Ratio of Averages	CEU14	0.193195	0.00137637	7454856
CEU14	CHB14	WC	Average of Ratios	CHB14	0.0723112	0.000461973	6795740
CEU14	CHB14	WC	Ratio of Averages	CHB14	0.106648	0.000818932	6795740
CEU14	CHB14	Hudson	Average of Ratios	CHB14	0.0636413	0.000466291	6795740
CEU14	CHB14	Hudson	Ratio of Averages	CHB14	0.0982988	0.000826585	6795740
CEU14	CHB14	Nei	Average of Ratios	CHB14	0.07614	0.000601717	6795740
CEU14	CHB14	Nei	Ratio of Averages	CHB14	0.105161	0.000929112	6795740
CEU14	CHB14	WH	Average of Ratios	CHB14	0.0636413	0.000466291	6795740
CEU14	CHB14	WH	Ratio of Averages	CHB14	0.0982988	0.000826585	6795740
CEU14	CHB14	Population-specific (CEU14)	Average of Ratios	CHB14	0.298144	0.00140411	6795740
CEU14	CHB14	Population-specific (CEU14)	Ratio of Averages	CHB14	0.156619	0.00127944	6795740
CEU14	CHB14	Population-specific (CHB14)	Average of Ratios	CHB14	-0.170862	0.00137153	6795740
CEU14	CHB14	Population-specific (CHB14)	Ratio of Averages	CHB14	0.0399787	0.00126647	6795740
CEU14	CHB14	WC	Average of Ratios	Both	0.0752494	0.000596581	5061618
CEU14	CHB14	WC	Ratio of Averages	Both	0.10211	0.000873054	5061618
CEU14	CHB14	Hudson	Average of Ratios	Both	0.0666068	0.000602157	5061618
CEU14	CHB14	Hudson	Ratio of Averages	Both	0.0937183	0.000881214	5061618
CEU14	CHB14	Nei	Average of Ratios	Both	0.0805255	0.000773393	5061618
CEU14	CHB14	Nei	Ratio of Averages	Both	0.100024	0.000985852	5061618
CEU14	CHB14	WH	Average of Ratios	Both	0.0666068	0.000602157	5061618
CEU14	CHB14	WH	Ratio of Averages	Both	0.0937183	0.000881214	5061618
CEU14	CHB14	Population-specific (CEU14)	Average of Ratios	Both	0.0576867	0.00115371	5061618
CEU14	CHB14	Population-specific (CEU14)	Ratio of Averages	Both	0.0872658	0.00119147	5061618
CEU14	CHB14	Population-specific (CHB14)	Average of Ratios	Both	0.075527	0.00122991	5061618
CEU14	CHB14	Population-specific (CHB14)	Ratio of Averages	Both	0.100171	0.00131071	5061618
CEU14	CHB14	WC	Average of Ratios	Either	0.0704568	0.000365899	9188978
CEU14	CHB14	WC	Ratio of Averages	Either	0.111607	0.000759391	9188978
CEU14	CHB14	Hudson	Average of Ratios	Either	0.0617695	0.000369319	9188978
CEU14	CHB14	Hudson	Ratio of Averages	Either	0.103304	0.000766488	9188978
CEU14	CHB14	Nei	Average of Ratios	Either	0.0731528	0.000476965	9188978
CEU14	CHB14	Nei	Ratio of Averages	Either	0.110802	0.000866028	9188978
CEU14	CHB14	WH	Average of Ratios	Either	0.0617695	0.000369319	9188978
CEU14	CHB14	WH	Ratio of Averages	Either	0.103304	0.000766488	9188978
CEU14	CHB14	Population-specific (CEU14)	Average of Ratios	Either	-0.0105464	0.00151691	9188978
CEU14	CHB14	Population-specific (CEU14)	Ratio of Averages	Either	0.0741979	0.0012287	9188978
CEU14	CHB14	Population-specific (CHB14)	Average of Ratios	Either	0.134085	0.00154023	9188978
CEU14	CHB14	Population-specific (CHB14)	Ratio of Averages	Either	0.132411	0.00132854	9188978
CHB	CEU14	WC	Average of Ratios	YRI	0.101196	0.000440797	7215431
CHB	CEU14	WC	Ratio of Averages	YRI	0.114063	0.000648682	7215431
CHB	CEU14	Hudson	Average of Ratios	YRI	0.0732661	0.000354689	7215431
CHB	CEU14	Hudson	Ratio of Averages	YRI	0.106507	0.000631467	7215431
CHB	CEU14	Nei	Average of Ratios	YRI	0.0850381	0.000452398	7215431
CHB	CEU14	Nei	Ratio of Averages	YRI	0.113621	0.000711139	7215431
CHB	CEU14	WH	Average of Ratios	YRI	0.0611189	0.00104604	7215431
CHB	CEU14	WH	Ratio of Averages	YRI	0.128615	0.000891765	7215431
CHB	CEU14	Population-specific (CHB)	Average of Ratios	YRI	0.057021	0.00136332	7215431
CHB	CEU14	Population-specific (CHB)	Ratio of Averages	YRI	0.136073	0.00104981	7215431
CHB	CEU14	Population-specific (CEU14)	Average of Ratios	YRI	0.0895111	0.0013652	7215431
CHB	CEU14	Population-specific (CEU14)	Ratio of Averages	YRI	0.0769413	0.00103333	7215431
CHB	CEU14	WC	Average of Ratios	CHB	0.0595723	0.000345206	10162696
CHB	CEU14	WC	Ratio of Averages	CHB	0.106904	0.000701946	10162696
CHB	CEU14	Hudson	Average of Ratios	CHB	0.0553382	0.000296499	10162696
CHB	CEU14	Hudson	Ratio of Averages	CHB	0.104508	0.000708665	10162696
CHB	CEU14	Nei	Average of Ratios	CHB	0.0638761	0.000378011	10162696
CHB	CEU14	Nei	Ratio of Averages	CHB	0.111328	0.000796084	10162696
CHB	CEU14	WH	Average of Ratios	CHB	-0.216561	0.000932713	10162696
CHB	CEU14	WH	Ratio of Averages	CHB	0.0905803	0.000990391	10162696
CHB	CEU14	Population-specific (CHB)	Average of Ratios	CHB	-0.308287	0.0012134	10162696
CHB	CEU14	Population-specific (CHB)	Ratio of Averages	CHB	0.0858819	0.00116218	10162696
CHB	CEU14	Population-specific (CEU14)	Average of Ratios	CHB	0.418963	0.00117805	10162696
CHB	CEU14	Population-specific (CEU14)	Ratio of Averages	CHB	0.123133	0.00114251	10162696
CHB	CEU14	WC	Average of Ratios	CEU14	0.121154	0.000545934	7454856
CHB	CEU14	WC	Ratio of Averages	CEU14	0.114722	0.000807046	7454856
CHB	CEU14	Hudson	Average of Ratios	CEU14	0.0651309	0.000407909	7454856
CHB	CEU14	Hudson	Ratio of Averages	CEU14	0.100026	0.000738679	7454856
CHB	CEU14	Nei	Average of Ratios	CEU14	0.0756508	0.000518118	7454856
CHB	CEU14	Nei	Ratio of Averages	CEU14	0.106402	0.000826805	7454856
CHB	CEU14	WH	Average of Ratios	CEU14	0.28108	0.00102383	7454856
CHB	CEU14	WH	Ratio of Averages	CEU14	0.170318	0.00107123	7454856
CHB	CEU14	Population-specific (CHB)	Average of Ratios	CEU14	0.35393	0.00131375	7454856
CHB	CEU14	Population-specific (CHB)	Ratio of Averages	CEU14	0.194032	0.00125196	7454856
CHB	CEU14	Population-specific (CEU14)	Average of Ratios	CEU14	-0.223668	0.00127335	7454856
CHB	CEU14	Population-specific (CEU14)	Ratio of Averages	CEU14	0.00601955	0.00111488	7454856
CHB	CEU14	WC	Average of Ratios	Both	0.099344	0.000645801	5789039
CHB	CEU14	WC	Ratio of Averages	Both	0.109868	0.000844979	5789039
CHB	CEU14	Hudson	Average of Ratios	Both	0.0740035	0.000528096	5789039
CHB	CEU14	Hudson	Ratio of Averages	Both	0.100539	0.000804833	5789039
CHB	CEU14	Nei	Average of Ratios	Both	0.086511	0.000673539	5789039
CHB	CEU14	Nei	Ratio of Averages	Both	0.106935	0.000900961	5789039
CHB	CEU14	WH	Average of Ratios	Both	0.144305	0.0010594	5789039
CHB	CEU14	WH	Ratio of Averages	Both	0.13544	0.00111569	5789039
CHB	CEU14	Population-specific (CHB)	Average of Ratios	Both	0.168021	0.00132201	5789039
CHB	CEU14	Population-specific (CHB)	Ratio of Averages	Both	0.147214	0.00128639	5789039
CHB	CEU14	Population-specific (CEU14)	Average of Ratios	Both	-0.0200145	0.00122981	5789039
CHB	CEU14	Population-specific (CEU14)	Ratio of Averages	Both	0.0538635	0.00113796	5789039
CHB	CEU14	WC	Average of Ratios	Either	0.0789193	0.0003284	11828513
CHB	CEU14	WC	Ratio of Averages	Either	0.111255	0.000676292	11828513
CHB	CEU14	Hudson	Average of Ratios	Either	0.0523749	0.000255471	11828513
CHB	CEU14	Hudson	Ratio of Averages	Either	0.103827	0.000657656	11828513
CHB	CEU14	Nei	Average of Ratios	Either	0.0602192	0.000324443	11828513
CHB	CEU14	Nei	Ratio of Averages	Either	0.110606	0.000738563	11828513
CHB	CEU14	WH	Average of Ratios	Either	-0.0795387	0.000921843	11828513
CHB	CEU14	WH	Ratio of Averages	Either	0.125327	0.000956739	11828513
CHB	CEU14	Population-specific (CHB)	Average of Ratios	Either	-0.12404	0.00120886	11828513
CHB	CEU14	Population-specific (CHB)	Ratio of Averages	Either	0.13258	0.00113449	11828513
CHB	CEU14	Population-specific (CEU14)	Average of Ratios	Either	0.22879	0.00119146	11828513
CHB	CEU14	Population-specific (CEU14)	Ratio of Averages	Either	0.0750744	0.00111073	11828513
CHB	CHB14	WC	Average of Ratios	YRI	-0.000949818	5.92907e-05	6581579
CHB	CHB14	WC	Ratio of Averages	YRI	0.000112851	8.47795e-05	6581579
CHB	CHB14	Hudson	Average of Ratios	YRI	-0.00315057	6.84727e-05	6581579
CHB	CHB14	Hudson	Ratio of Averages	YRI	-0.00505744	8.74119e-05	6581579
CHB	CHB14	Nei	Average of Ratios	YRI	-0.0029503	7.09402e-05	6581579
CHB	CHB14	Nei	Ratio of Averages	YRI	-0.00509687	8.7877e-05	6581579
CHB	CHB14	WH	Average of Ratios	YRI	-0.107747	0.000701312	6581579
CHB	CHB14	WH	Ratio of Averages	YRI	-0.00534948	0.000254816	6581579
CHB	CHB14	Population-specific (CHB)	Average of Ratios	YRI	-0.143033	0.00094592	6581579
CHB	CHB14	Population-specific (CHB)	Ratio of Averages	YRI	-0.005448	0.00033967	6581579
CHB	CHB14	Population-specific (CHB14)	Average of Ratios	YRI	0.136732	0.00100312	6581579
CHB	CHB14	Population-specific (CHB14)	Ratio of Averages	YRI	-0.00466687	0.000382918	6581579
CHB	CHB14	WC	Average of Ratios	CHB	-0.0018539	4.62378e-05	10162696
CHB	CHB14	WC	Ratio of Averages	CHB	9.34216e-05	8.7819e-05	10162696
CHB	CHB14	Hudson	Average of Ratios	CHB	-0.00237389	5.33699e-05	10162696
CHB	CHB14	Hudson	Ratio of Averages	CHB	-0.00507737	9.05729e-05	10162696
CHB	CHB14	Nei	Average of Ratios	CHB	-0.00222441	5.52421e-05	10162696
CHB	CHB14	Nei	Ratio of Averages	CHB	-0.00511691	9.10531e-05	10162696
CHB	CHB14	WH	Average of Ratios	CHB	-0.208839	0.000672109	10162696
CHB	CHB14	WH	Ratio of Averages	CHB	-0.00535992	0.000279708	10162696
CHB	CHB14	Population-specific (CHB)	Average of Ratios	CHB	-0.278489	0.000905237	10162696
CHB	CHB14	Population-specific (CHB)	Ratio of Averages	CHB	-0.00545524	0.000373264	10162696
CHB	CHB14	Population-specific (CHB14)	Average of Ratios	CHB	0.273742	0.000949285	10162696
CHB	CHB14	Population-specific (CHB14)	Ratio of Averages	CHB	-0.0046995	0.000417272	10162696
CHB	CHB14	WC	Average of Ratios	CHB14	0.00101734	6.92778e-05	6795740
CHB	CHB14	WC	Ratio of Averages	CHB14	-8.09514e-05	9.32336e-05	6795740
CHB	CHB14	Hudson	Average of Ratios	CHB14	-0.00761887	6.85332e-05	6795740
CHB	CHB14	Hudson	Ratio of Averages	CHB14	-0.00587379	9.38079e-05	6795740
CHB	CHB14	Nei	Average of Ratios	CHB14	-0.00749292	7.0833e-05	6795740
CHB	CHB14	Nei	Ratio of Averages	CHB14	-0.00591826	9.42471e-05	6795740
CHB	CHB14	WH	Average of Ratios	CHB14	0.0510532	0.00045492	6795740
CHB	CHB14	WH	Ratio of Averages	CHB14	0.011079	0.000279835	6795740
CHB	CHB14	Population-specific (CHB)	Average of Ratios	CHB14	0.0708462	0.000610357	6795740
CHB	CHB14	Population-specific (CHB)	Ratio of Averages	CHB14	0.016798	0.000370926	6795740
CHB	CHB14	Population-specific (CHB14)	Average of Ratios	CHB14	-0.0860839	0.000639323	6795740
CHB	CHB14	Population-specific (CHB14)	Ratio of Averages	CHB14	-0.0285456	0.000405087	6795740
CHB	CHB14	WC	Average of Ratios	Both	0.00101734	6.92778e-05	6795740
CHB	CHB14	WC	Ratio of Averages	Both	-8.09514e-05	9.32336e-05	6795740
CHB	CHB14	Hudson	Average of Ratios	Both	-0.00761887	6.85332e-05	6795740
CHB	CHB14	Hudson	Ratio of Averages	Both	-0.00587379	9.38079e-05	6795740
CHB	CHB14	Nei	Average of Ratios	Both	-0.00749292	7.0833e-05	6795740
CHB	CHB14	Nei	Ratio of Averages	Both	-0.00591826	9.42471e-05	6795740
CHB	CHB14	WH	Average of Ratios	Both	0.0510532	0.00045492	6795740
CHB	CHB14	WH	Ratio of Averages	Both	0.011079	0.000279835	6795740
CHB	CHB14	Population-specific (CHB)	Average of Ratios	Both	0.0708462	0.000610357	6795740
CHB	CHB14	Population-specific (CHB)	Ratio of Averages	Both	0.016798	0.000370926	6795740
CHB	CHB14	Population-specific (CHB14)	Average of Ratios	Both	-0.0860839	0.000639323	6795740
CHB	CHB14	Population-specific (CHB14)	Ratio of Averages	Both	-0.0285456	0.000405087	6795740
CHB	CHB14	WC	Average of Ratios	Either	-0.0018539	4.62378e-05	10162696
CHB	CHB14	WC	Ratio of Averages	Either	9.34216e-05	8.7819e-05	10162696
CHB	CHB14	Hudson	Average of Ratios	Either	-0.00237389	5.33699e-05	10162696
CHB	CHB14	Hudson	Ratio of Averages	Either	-0.00507737	9.05729e-05	10162696
CHB	CHB14	Nei	Average of Ratios	Either	-0.00222441	5.52421e-05	10162696
CHB	CHB14	Nei	Ratio of Averages	Either	-0.00511691	9.10531e-05	10162696
CHB	CHB14	WH	Average of Ratios	Either	-0.208839	0.000672109	10162696
CHB	CHB14	WH	Ratio of Averages	Either	-0.00535992	0.000279708	10162696
CHB	CHB14	Population-specific (CHB)	Average of Ratios	Either	-0.278489	0.000905237	10162696
CHB	CHB14	Population-specific (CHB)	Ratio of Averages	Either	-0.00545524	0.000373264	10162696
CHB	CHB14	Population-specific (CHB14)	Average of Ratios	Either	0.273742	0.000949285	10162696
CHB	CHB14	Population-specific (CHB14)	Ratio of Averages	Either	-0.0046995	0.000417272	10162696
CHB	CHS	WC	Average of Ratios	YRI	0.00279386	2.70861e-05	6890697
CHB	CHS	WC	Ratio of Averages	YRI	0.00301508	3.77456e-05	6890697
CHB	CHS	Hudson	Average of Ratios	YRI	0.0015147	2.70821e-05	6890697
CHB	CHS	Hudson	Ratio of Averages	YRI	0.00174113	3.77887e-05	6890697
CHB	CHS	Nei	Average of Ratios	YRI	0.00156137	2.7578e-05	6890697
CHB	CHS	Nei	Ratio of Averages	YRI	0.00174708	3.79507e-05	6890697
CHB	CHS	WH	Average of Ratios	YRI	0.00183448	3.04096e-05	6890697
CHB	CHS	WH	Ratio of Averages	YRI	0.00177197	3.8272e-05	6890697
CHB	CHS	Population-specific (CHB)	Average of Ratios	YRI	-0.0194844	0.000713968	6890697
CHB	CHS	Population-specific (CHB)	Ratio of Averages	YRI	-0.000284284	0.000221701	6890697
CHB	CHS	Population-specific (CHS)	Average of Ratios	YRI	0.0225138	0.000720574	6890697
CHB	CHS	Population-specific (CHS)	Ratio of Averages	YRI	0.00376655	0.000229077	6890697
CHB	CHS	WC	Average of Ratios	CHB	0.00225038	2.22019e-05	10162696
CHB	CHS	WC	Ratio of Averages	CHB	0.00295417	3.99408e-05	10162696
CHB	CHS	Hudson	Average of Ratios	CHB	0.00094143	2.21942e-05	10162696
CHB	CHS	Hudson	Ratio of Averages	CHB	0.00167911	3.99831e-05	10162696
CHB	CHS	Nei	Average of Ratios	CHB	0.000978282	2.25968e-05	10162696
CHB	CHS	Nei	Ratio of Averages	CHB	0.00168479	4.01521e-05	10162696
CHB	CHS	WH	Average of Ratios	CHB	0.00369722	2.52321e-05	10162696
CHB	CHS	WH	Ratio of Averages	CHB	0.00179705	4.04875e-05	10162696
CHB	CHS	Population-specific (CHB)	Average of Ratios	CHB	-0.180022	0.000643544	10162696
CHB	CHS	Population-specific (CHB)	Ratio of Averages	CHB	-0.00606556	0.000241804	10162696
CHB	CHS	Population-specific (CHS)	Average of Ratios	CHB	0.181905	0.000648365	10162696
CHB	CHS	Population-specific (CHS)	Ratio of Averages	CHB	0.00942377	0.000249025	10162696
CHB	CHS	WC	Average of Ratios	CHS	0.00228375	2.19464e-05	10147887
CHB	CHS	WC	Ratio of Averages	CHS	0.00295592	3.97868e-05	10147887
CHB	CHS	Hudson	Average of Ratios	CHS	0.00104098	2.19576e-05	10147887
CHB	CHS	Hudson	Ratio of Averages	CHS	0.00168327	3.98372e-05	10147887
CHB	CHS	Nei	Average of Ratios	CHS	0.00107834	2.23578e-05	10147887
CHB	CHS	Nei	Ratio of Averages	CHS	0.00168897	4.00057e-05	10147887
CHB	CHS	WH	Average of Ratios	CHS	-0.00158073	2.44654e-05	10147887
CHB	CHS	WH	Ratio of Averages	CHS	0.00159821	4.03232e-05	10147887
CHB	CHS	Population-specific (CHB)	Average of Ratios	CHS	0.1732	0.000606253	10147887
CHB	CHS	Population-specific (CHB)	Ratio of Averages	CHS	0.00726918	0.000240238	10147887
CHB	CHS	Population-specific (CHS)	Average of Ratios	CHS	-0.171118	0.000609583	10147887
CHB	CHS	Population-specific (CHS)	Ratio of Averages	CHS	-0.00390264	0.000247123	10147887
CHB	CHS	WC	Average of Ratios	Both	0.00202025	2.73315e-05	8358376
CHB	CHS	WC	Ratio of Averages	Both	0.00293372	4.13653e-05	8358376
CHB	CHS	Hudson	Average of Ratios	Both	0.000743619	2.73378e-05	8358376
CHB	CHS	Hudson	Ratio of Averages	Both	0.00165981	4.14128e-05	8358376
CHB	CHS	Nei	Average of Ratios	Both	0.000784899	2.78355e-05	8358376
CHB	CHS	Nei	Ratio of Averages	Both	0.00166541	4.1587e-05	8358376
CHB	CHS	WH	Average of Ratios	Both	0.000813056	2.90283e-05	8358376
CHB	CHS	WH	Ratio of Averages	Both	0.00167884	4.19665e-05	8358376
CHB	CHS	Population-specific (CHB)	Average of Ratios	Both	-0.00381604	0.000441851	8358376
CHB	CHS	Population-specific (CHB)	Ratio of Averages	Both	0.0004104	0.000246794	8358376
CHB	CHS	Population-specific (CHS)	Average of Ratios	Both	0.00530328	0.000449138	8358376
CHB	CHS	Population-specific (CHS)	Ratio of Averages	Both	0.00290922	0.000255155	8358376
CHB	CHS	WC	Average of Ratios	Either	0.00243964	1.84805e-05	11952207
CHB	CHS	WC	Ratio of Averages	Either	0.00297608	3.87993e-05	11952207
CHB	CHS	Hudson	Average of Ratios	Either	0.00116429	1.84775e-05	11952207
CHB	CHS	Hudson	Ratio of Averages	Either	0.00170229	3.88446e-05	11952207
CHB	CHS	Nei	Average of Ratios	Either	0.00119847	1.88142e-05	11952207
CHB	CHS	Nei	Ratio of Averages	Either	0.00170807	3.90096e-05	11952207
CHB	CHS	WH	Average of Ratios	Either	0.00123298	2.14258e-05	11952207
CHB	CHS	WH	Ratio of Averages	Either	0.00171614	3.93202e-05	11952207
CHB	CHS	Population-specific (CHB)	Average of Ratios	Either	-0.00334674	0.000588914	11952207
CHB	CHS	Population-specific (CHB)	Ratio of Averages	Either	0.000792867	0.000233915	11952207
CHB	CHS	Population-specific (CHS)	Average of Ratios	Either	0.00567531	0.000592996	11952207
CHB	CHS	Population-specific (CHS)	Ratio of Averages	Either	0.00261171	0.000240685	11952207
CHB	CLM	WC	Average of Ratios	YRI	0.0479252	0.000194696	10143802
CHB	CLM	WC	Ratio of Averages	YRI	0.0770398	0.000423619	10143802
CHB	CLM	Hudson	Average of Ratios	YRI	0.0421917	0.000184699	10143802
CHB	CLM	Hudson	Ratio of Averages	YRI	0.0740577	0.000413844	10143802
CHB	CLM	Nei	Average of Ratios	YRI	0.0463612	0.000219352	10143802
CHB	CLM	Nei	Ratio of Averages	YRI	0.0771599	0.000447711	10143802
CHB	CLM	WH	Average of Ratios	YRI	0.125137	0.00030655	10143802
CHB	CLM	WH	Ratio of Averages	YRI	0.0901068	0.000479335	10143802
CHB	CLM	Population-specific (CHB)	Average of Ratios	YRI	0.39415	0.00103919	10143802
CHB	CLM	Population-specific (CHB)	Ratio of Averages	YRI	0.142158	0.000876493	10143802
CHB	CLM	Population-specific (CLM)	Average of Ratios	YRI	-0.309767	0.00102965	10143802
CHB	CLM	Population-specific (CLM)	Ratio of Averages	YRI	0.00595729	0.000697775	10143802
CHB	CLM	WC	Average of Ratios	CHB	0.0438667	0.000223229	10162696
CHB	CLM	WC	Ratio of Averages	CHB	0.0753569	0.000476202	10162696
CHB	CLM	Hudson	Average of Ratios	CHB	0.0422224	0.000213699	10162696
CHB	CLM	Hudson	Ratio of Averages	CHB	0.0736465	0.000472201	10162696
CHB	CLM	Nei	Average of Ratios	CHB	0.0464324	0.000254501	10162696
CHB	CLM	Nei	Ratio of Averages	CHB	0.0767113	0.000510599	10162696
CHB	CLM	WH	Average of Ratios	CHB	-0.0189883	0.000347284	10162696
[truncated: 5,201 more rows]
